# Supplementary material for: Efficient construction of C–N and C–S bonds in 2-iminothiazoles via cascade reaction of enaminones with potassium thiocyanate
Source: Royal Society of Chemistry journal article supplement (doi:10.1039/c7ob00306d), 2017-01-01
Supplement: c7ob00306d1.pdf [file c7ob00306d1.pdf]

# Efficient construction of C–N and C–S bonds in 2-iminothiazoles via cascade reaction of enamines with potassium thiocyanate †

Xue-Bing Chen,<sup>\* a</sup> Xue-Quan Wang,<sup>a</sup> Jia-Na Song,<sup>a</sup> Qing-Li Yang,<sup>a</sup> Wei Liu,<sup>\*a</sup> Chao Huang<sup>\*b</sup>

<sup>a</sup>Key Laboratory of Natural Pharmaceutical & Chemical Biology of Yunnan Province, School of Science, Honghe University, Mengzi, Yunnan 661199, P. R. China.

<sup>b</sup>School of Chemistry and Environment, Engineering Research Center of Biopolymer Functional Materials of Yunnan, Yunnan Minzu University, Kunming, Yunnan 650503

\*E-mail: orangekaka@126.com, liuwei4728@163.com

Tel & Fax: +86 873 3694923

## Supporting Information

### Table of Contents

|                                                                                                         |    |
|---------------------------------------------------------------------------------------------------------|----|
| <b>General Information</b> .....                                                                        | 3  |
| <b>Spectroscopic Data of 2-iminothiazoles 4</b> .....                                                   | 4  |
| <b>Spectroscopic Data of 5v</b> .....                                                                   | 15 |
| <b>Figure 1.</b> <sup>1</sup> H NMR (400 MHz, CDCl <sub>3</sub> ) spectra of compound <b>4a</b> .....   | 16 |
| <b>Figure 2.</b> <sup>13</sup> C NMR (100 MHz, CDCl <sub>3</sub> ) spectra of compound <b>4a</b> .....  | 17 |
| <b>Figure 3.</b> <sup>1</sup> H NMR (400 MHz, CDCl <sub>3</sub> ) spectra of compound <b>4b</b> .....   | 18 |
| <b>Figure 4.</b> <sup>13</sup> C NMR (100 MHz, CDCl <sub>3</sub> ) spectra of compound <b>4b</b> .....  | 19 |
| <b>Figure 5.</b> <sup>1</sup> H NMR (400 MHz, CDCl <sub>3</sub> ) spectra of compound <b>4c</b> .....   | 20 |
| <b>Figure 6.</b> <sup>13</sup> C NMR (100 MHz, CDCl <sub>3</sub> ) spectra of compound <b>4c</b> .....  | 21 |
| <b>Figure 7.</b> <sup>1</sup> H NMR (400 MHz, CDCl <sub>3</sub> ) spectra of compound <b>4d</b> .....   | 22 |
| <b>Figure 8.</b> <sup>13</sup> C NMR (100 MHz, CDCl <sub>3</sub> ) spectra of compound <b>4d</b> .....  | 23 |
| <b>Figure 9.</b> <sup>1</sup> H NMR (400 MHz, CDCl <sub>3</sub> ) spectra of compound <b>4e</b> .....   | 24 |
| <b>Figure 10.</b> <sup>13</sup> C NMR (100 MHz, CDCl <sub>3</sub> ) spectra of compound <b>4e</b> ..... | 25 |
| <b>Figure 11.</b> <sup>1</sup> H NMR (400 MHz, CDCl <sub>3</sub> ) spectra of compound <b>4f</b> .....  | 26 |
| <b>Figure 12.</b> <sup>13</sup> C NMR (100 MHz, CDCl <sub>3</sub> ) spectra of compound <b>4f</b> ..... | 27 |
| <b>Figure 13.</b> <sup>1</sup> H NMR (400 MHz, CDCl <sub>3</sub> ) spectra of compound <b>4g</b> .....  | 28 |
| <b>Figure 14.</b> <sup>13</sup> C NMR (100 MHz, CDCl <sub>3</sub> ) spectra of compound <b>4g</b> ..... | 29 |
| <b>Figure 15.</b> <sup>1</sup> H NMR (400 MHz, CDCl <sub>3</sub> ) spectra of compound <b>4h</b> .....  | 30 |
| <b>Figure 16.</b> <sup>13</sup> C NMR (100 MHz, CDCl <sub>3</sub> ) spectra of compound <b>4h</b> ..... | 31 |
| <b>Figure 17.</b> <sup>1</sup> H NMR (400 MHz, CDCl <sub>3</sub> ) spectra of compound <b>4i</b> .....  | 32 |
| <b>Figure 18.</b> <sup>13</sup> C NMR (100 MHz, CDCl <sub>3</sub> ) spectra of compound <b>4i</b> ..... | 33 |

|                   |                                                                                       |    |
|-------------------|---------------------------------------------------------------------------------------|----|
| <b>Figure 19.</b> | $^1\text{H}$ NMR (400 MHz, $\text{CDCl}_3$ ) spectra of compound <b>4j</b> .....      | 34 |
| <b>Figure 20.</b> | $^{13}\text{C}$ NMR (100 MHz, $\text{CDCl}_3$ ) spectra of compound <b>4j</b> .....   | 35 |
| <b>Figure 21.</b> | $^1\text{H}$ NMR (400 MHz, $\text{CDCl}_3$ ) spectra of compound <b>4k</b> .....      | 36 |
| <b>Figure 22.</b> | $^{13}\text{C}$ NMR (100 MHz, $\text{CDCl}_3$ ) spectra of compound <b>4k</b> .....   | 37 |
| <b>Figure 23.</b> | $^1\text{H}$ NMR (400 MHz, $\text{CDCl}_3$ ) spectra of compound <b>4l</b> .....      | 38 |
| <b>Figure 24.</b> | $^{13}\text{C}$ NMR (100 MHz, $\text{CDCl}_3$ ) spectra of compound <b>4l</b> .....   | 39 |
| <b>Figure 25.</b> | $^1\text{H}$ NMR (400 MHz, $\text{CDCl}_3$ ) spectra of compound <b>4m</b> .....      | 40 |
| <b>Figure 26.</b> | $^{13}\text{C}$ NMR (100 MHz, $\text{CDCl}_3$ ) spectra of compound <b>4m</b> .....   | 41 |
| <b>Figure 27.</b> | $^1\text{H}$ NMR (400 MHz, $\text{DMSO}-d_6$ ) spectra of compound <b>4n</b> .....    | 42 |
| <b>Figure 28.</b> | $^{13}\text{C}$ NMR (100 MHz, $\text{DMSO}-d_6$ ) spectra of compound <b>4n</b> ..... | 43 |
| <b>Figure 29.</b> | $^1\text{H}$ NMR (400 MHz, $\text{CDCl}_3$ ) spectra of compound <b>4o</b> .....      | 44 |
| <b>Figure 30.</b> | $^{13}\text{C}$ NMR (100 MHz, $\text{CDCl}_3$ ) spectra of compound <b>4o</b> .....   | 45 |
| <b>Figure 31.</b> | $^1\text{H}$ NMR (400 MHz, $\text{CDCl}_3$ ) spectra of compound <b>4p</b> .....      | 46 |
| <b>Figure 32.</b> | $^{13}\text{C}$ NMR (100 MHz, $\text{CDCl}_3$ ) spectra of compound <b>4p</b> .....   | 47 |
| <b>Figure 33.</b> | $^1\text{H}$ NMR (400 MHz, $\text{CDCl}_3$ ) spectra of compound <b>4q</b> .....      | 48 |
| <b>Figure 34.</b> | $^{13}\text{C}$ NMR (100 MHz, $\text{CDCl}_3$ ) spectra of compound <b>4q</b> .....   | 49 |
| <b>Figure 35.</b> | $^1\text{H}$ NMR (400 MHz, $\text{CDCl}_3$ ) spectra of compound <b>4r</b> .....      | 50 |
| <b>Figure 36.</b> | $^{13}\text{C}$ NMR (100 MHz, $\text{CDCl}_3$ ) spectra of compound <b>4r</b> .....   | 51 |
| <b>Figure 37.</b> | $^1\text{H}$ NMR (400 MHz, $\text{DMSO}-d_6$ ) spectra of compound <b>4s</b> .....    | 52 |
| <b>Figure 38.</b> | $^{13}\text{C}$ NMR (100 MHz, $\text{DMSO}-d_6$ ) spectra of compound <b>4s</b> ..... | 53 |
| <b>Figure 39.</b> | $^1\text{H}$ NMR (400 MHz, $\text{CDCl}_3$ ) spectra of compound <b>4t</b> .....      | 54 |
| <b>Figure 40.</b> | $^{13}\text{C}$ NMR (100 MHz, $\text{CDCl}_3$ ) spectra of compound <b>4t</b> .....   | 55 |
| <b>Figure 41.</b> | $^1\text{H}$ NMR (400 MHz, $\text{CDCl}_3$ ) spectra of compound <b>4u</b> .....      | 56 |
| <b>Figure 42.</b> | $^{13}\text{C}$ NMR (100 MHz, $\text{CDCl}_3$ ) spectra of compound <b>4u</b> .....   | 57 |
| <b>Figure 43.</b> | $^1\text{H}$ NMR (400 MHz, $\text{CDCl}_3$ ) spectra of compound <b>4v</b> .....      | 58 |
| <b>Figure 44.</b> | $^{13}\text{C}$ NMR (100 MHz, $\text{CDCl}_3$ ) spectra of compound <b>4v</b> .....   | 59 |
| <b>Figure 45.</b> | $^1\text{H}$ NMR (400 MHz, $\text{CDCl}_3$ ) spectra of compound <b>4w</b> .....      | 60 |
| <b>Figure 46.</b> | $^{13}\text{C}$ NMR (100 MHz, $\text{CDCl}_3$ ) spectra of compound <b>4w</b> .....   | 61 |
| <b>Figure 47.</b> | $^1\text{H}$ NMR (400 MHz, $\text{DMSO}-d_6$ ) spectra of compound <b>4x</b> .....    | 62 |
| <b>Figure 48.</b> | $^{13}\text{C}$ NMR (100 MHz, $\text{DMSO}-d_6$ ) spectra of compound <b>4x</b> ..... | 63 |
| <b>Figure 49.</b> | $^1\text{H}$ NMR (400 MHz, $\text{CDCl}_3$ ) spectra of compound <b>4y</b> .....      | 64 |
| <b>Figure 50.</b> | $^{13}\text{C}$ NMR (100 MHz, $\text{CDCl}_3$ ) spectra of compound <b>4y</b> .....   | 65 |
| <b>Figure 51.</b> | $^1\text{H}$ NMR (400 MHz, $\text{CDCl}_3$ ) spectra of compound <b>5v</b> .....      | 66 |
| <b>Figure 52.</b> | $^{13}\text{C}$ NMR (100 MHz, $\text{CDCl}_3$ ) spectra of compound <b>5v</b> .....   | 67 |

## General Information

All compounds were fully characterized by spectroscopic data. NMR spectra were recorded on a Bruker DRX500 ( $^1\text{H}$ : 500 MHz,  $^{13}\text{C}$ : 125 MHz), Bruker AVIII-400 ( $^1\text{H}$ : 400 MHz,  $^{13}\text{C}$ : 100 MHz) or Bruker AVIII-300 ( $^1\text{H}$ : 300 MHz,  $^{13}\text{C}$ : 75 MHz). Chemical shifts ( $\delta$ ) are expressed in units of ppm, and J values are given in Hz. DMSO- $d_6$  or  $\text{CDCl}_3$  were used as solvents. IR spectra were recorded on a FT-IR Thermo Nicolet Avatar 360 using a KBr pellet. The reactions were monitored by thin-layer chromatography (TLC) using silica gel GF254. The melting points are uncorrected and were determined on a XT-4A melting point apparatus. HRMs were performed on an Agilent LC/MSD TOF instrument and a Monoisotopic Mass instrument. All chemicals and solvents were used as received without further purification unless otherwise stated.

All chemicals and solvents were used as received without further purification unless otherwise stated. Column chromatography was performed on silica gel (200–300 mesh).

### General Procedure for the Preparation of 2-iminothiazoles 4

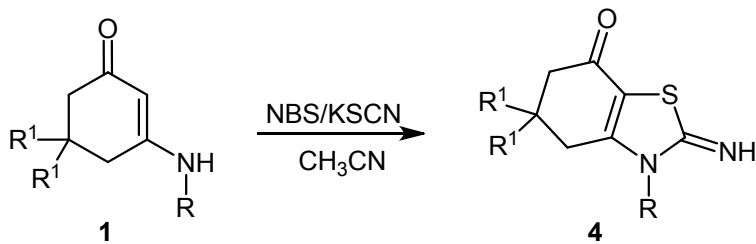

A mixture of enaminones **1** (1.0 mmol), NBS **2** (2.0mmol) and  $\text{CH}_3\text{CN}$  (15 mL) was stirred at room temperature for 0.5 hours. Upon completion, monitored by TLC, KSCN **3** (1.0 mmol) was then added. After the desired product formation indicated by TLC, the reaction mixture was quenched with saturated  $\text{NH}_4\text{Cl}$  solution (2 mL) and extracted with ethyl acetate (20 mL). The organic phase were dried over  $\text{Na}_2\text{SO}_4$ , and concentrated under vacuum. The residue was purified by flash chromatography (petroleum ether/ethyl acetate = 1:1) giving a yellow solid **4**.

## Spectroscopic Data of 2-iminothiazoles 4

### 3-(4-fluorophenyl)-2-imino-2,3,5,6-tetrahydrobenzo[*d*]thiazol-7(4*H*)-one (4a)

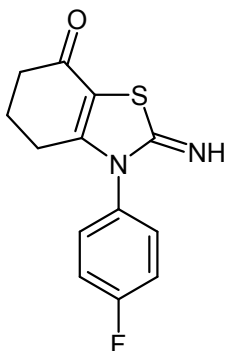

Yellow solid; Mp 122–123 °C; IR (KBr): 3283, 1640, 1509, 1358, 1219, 1191, 828 cm<sup>-1</sup>; <sup>1</sup>H NMR (400 MHz, CDCl<sub>3</sub>): δ = 7.30–7.34 (m, 2H, ArH), 7.21–7.25 (m, 2H, ArH), 2.50–2.55 (m, 2H, CH<sub>2</sub>), 2.33–2.37 (m, 2H, CH<sub>2</sub>), 2.07–2.13 (m, 2H, CH<sub>2</sub>); <sup>13</sup>C NMR (100 MHz, CDCl<sub>3</sub>): δ = 189.0, 164.5, 162.8 (d, <sup>1</sup>J<sub>C-F</sub> = 249.0 Hz), 153.8, 131.0, 130.4 (d, <sup>3</sup>J<sub>C-F</sub> = 9.0 Hz), 130.3 (d, <sup>3</sup>J<sub>C-F</sub> = 9.0 Hz), 117.3 (d, <sup>2</sup>J<sub>C-F</sub> = 23.0 Hz), 117.1 (d, <sup>2</sup>J<sub>C-F</sub> = 23.0 Hz), 111.5, 36.9, 24.9, 21.9; HRMS (ESI-TOF): *m/z* calcd for C<sub>13</sub>H<sub>12</sub>FN<sub>2</sub>OS [(M+H)<sup>+</sup>], 263.0649; found, 263.0667.

### 3-(3-fluorophenyl)-2-imino-2,3,5,6-tetrahydrobenzo[*d*]thiazol-7(4*H*)-one (4b)

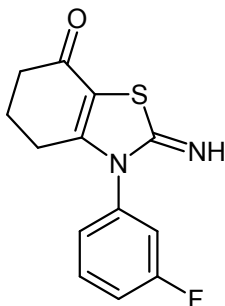

Yellow solid; Mp 102–104 °C; IR (KBr): 3281, 1654, 1489, 1402, 1308, 1171, 925 cm<sup>-1</sup>; <sup>1</sup>H NMR (400 MHz, CDCl<sub>3</sub>): δ = 7.51–7.55 (m, 1H, ArH), 7.19–7.24 (m, 1H, ArH), 7.08–7.15 (m, 2H, ArH), 2.52–2.55 (m, 2H, CH<sub>2</sub>), 2.37–2.40 (m, 2H, CH<sub>2</sub>), 2.08–2.12 (m, 2H, CH<sub>2</sub>); <sup>13</sup>C NMR (100 MHz, CDCl<sub>3</sub>): δ = 189.1, 163.1 (d, <sup>1</sup>J<sub>C-F</sub> = 249.0 Hz), 164.1, 153.5, 136.3, 131.3 (d, <sup>3</sup>J<sub>C-F</sub> = 9.0 Hz), 124.3, 116.9 (d, <sup>2</sup>J<sub>C-F</sub> = 19.0 Hz), 116.1 (d, <sup>2</sup>J<sub>C-F</sub> = 23.0 Hz), 111.7, 36.9, 24.9, 21.9; HRMS (ESI-TOF): *m/z* calcd for C<sub>13</sub>H<sub>12</sub>FN<sub>2</sub>OS [(M+H)<sup>+</sup>], 263.0649; found, 263.0650.

**3-(4-chlorophenyl)-2-imino-2,3,5,6-tetrahydrobenzo[*d*]thiazol-7(4*H*)-one (4c)**

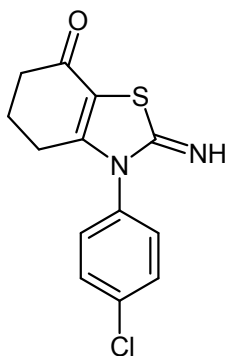

Yellow solid; Mp 130–132 °C; IR (KBr): 3291, 1640, 1494, 1357, 1191, 1090, 813 cm<sup>-1</sup>; <sup>1</sup>H NMR (400 MHz, CDCl<sub>3</sub>): δ = 7.51–7.54 (m, 2H, ArH), 7.27–7.30 (m, 2H, ArH), 2.52–2.55 (m, 2H, CH<sub>2</sub>), 2.34–2.38 (m, 2H, CH<sub>2</sub>), 2.11–2.14 (m, 2H, CH<sub>2</sub>); <sup>13</sup>C NMR (100 MHz, CDCl<sub>3</sub>): δ = 189.0, 164.2, 153.4, 135.7, 133.5, 130.4, 129.8, 111.7, 36.9, 24.9, 21.9; HRMS (ESI-TOF): *m/z* calcd for C<sub>13</sub>H<sub>12</sub>ClN<sub>2</sub>OS [(M+H)<sup>+</sup>], 279.0353; found, 279.0352.

**3-(3-chlorophenyl)-2-imino-2,3,5,6-tetrahydrobenzo[*d*]thiazol-7(4*H*)-one (4d)**

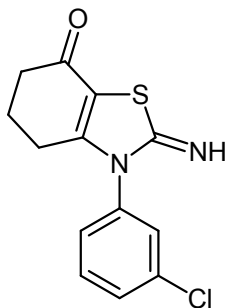

Yellow solid; Mp 108–109 °C; IR (KBr): 3329, 1639, 1574, 1406, 1358, 1046, 797 cm<sup>-1</sup>; <sup>1</sup>H NMR (400 MHz, CDCl<sub>3</sub>): δ = 7.47–7.50 (m, 2H, ArH), 7.35 (s, 1H, ArH), 7.23–7.26 (m, 1H, ArH), 2.52–2.56 (m, 2H, CH<sub>2</sub>), 2.36–2.39 (m, 2H, CH<sub>2</sub>), 2.09–2.13 (m, 2H, CH<sub>2</sub>); <sup>13</sup>C NMR (100 MHz, CDCl<sub>3</sub>): δ = 189.0, 164.1, 153.3, 136.2, 135.6, 131.0, 130.0, 128.8, 126.8, 111.8, 36.9, 24.9, 22.0; HRMS (ESI-TOF): *m/z* calcd for C<sub>13</sub>H<sub>12</sub>ClN<sub>2</sub>OS [(M+H)<sup>+</sup>], 279.0353; found, 279.0353.

**3-(2-chlorophenyl)-2-imino-2,3,5,6-tetrahydrobenzo[*d*]thiazol-7(4*H*)-one (4e)**

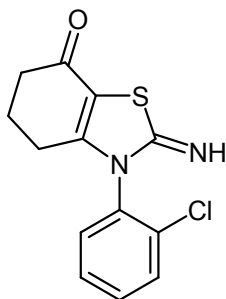

Yellow solid; Mp 116–118 °C; IR (KBr): 3216, 1657, 1597, 1522, 1402, 1076, 760  $\text{cm}^{-1}$ ;  $^1\text{H}$  NMR (400 MHz,  $\text{CDCl}_3$ ):  $\delta$  = 7.61 (d,  $J$  = 8.0 Hz, 1H, ArH), 7.45–7.49 (m, 2H, ArH), 7.42 (d,  $J$  = 8.0 Hz, 1H, ArH), 2.53–2.56 (m, 2H,  $\text{CH}_2$ ), 2.29–2.32 (m, 2H,  $\text{CH}_2$ ), 2.09–2.13 (m, 2H,  $\text{CH}_2$ );  $^{13}\text{C}$  NMR (100 MHz,  $\text{CDCl}_3$ ):  $\delta$  = 189.1, 163.5, 153.7, 133.3, 132.8, 131.4, 131.0, 130.8, 128.6, 111.8, 36.9, 24.3, 21.9; HRMS (ESI-TOF):  $m/z$  calcd for  $\text{C}_{13}\text{H}_{12}\text{ClN}_2\text{OS}$  [(M+H) $^+$ ], 279.0353; found, 279.0352.

**3-(4-bromophenyl)-2-imino-2,3,5,6-tetrahydrobenzo[d]thiazol-7(4H)-one (4f)**

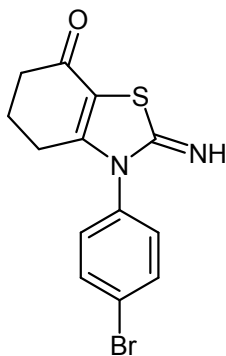

Yellow solid; Mp 129–131 °C; IR (KBr): 3283, 1644, 1489, 1409, 1189, 1070, 837  $\text{cm}^{-1}$ ;  $^1\text{H}$  NMR (400 MHz,  $\text{CDCl}_3$ ):  $\delta$  = 7.67 (d,  $J$  = 8.0 Hz, 2H, ArH), 7.22 (t,  $J$  = 4.0 Hz, 2H, ArH), 2.52–2.55 (m, 2H,  $\text{CH}_2$ ), 2.35–2.38 (m, 2H,  $\text{CH}_2$ ), 2.09–2.12 (m, 2H,  $\text{CH}_2$ );  $^{13}\text{C}$  NMR (100 MHz,  $\text{CDCl}_3$ ):  $\delta$  = 189.0, 164.2, 153.3, 134.1, 133.3, 130.1, 123.8, 111.7, 36.9, 24.9, 21.9; HRMS (ESI-TOF):  $m/z$  calcd for  $\text{C}_{13}\text{H}_{12}\text{BrN}_2\text{OS}$  [(M+H) $^+$ ], 322.9848; found, 322.9848.

**3-(3-bromophenyl)-2-imino-2,3,5,6-tetrahydrobenzo[d]thiazol-7(4H)-one (4g)**

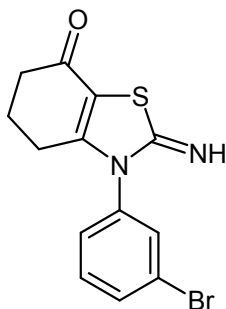

Yellow solid; Mp 182–184 °C; IR (KBr): 3293, 1634, 1579, 1401, 1361, 1192, 801  $\text{cm}^{-1}$ ;  $^1\text{H}$  NMR (400 MHz,  $\text{CDCl}_3$ ):  $\delta$  = 7.62–7.65 (m, 1H, ArH), 7.50 (s, 1H, ArH), 7.41–7.45 (m, 1H, ArH), 7.27–7.30 (m, 1H, ArH), 2.52–2.56 (m, 2H,  $\text{CH}_2$ ), 2.35–2.38 (m, 2H,  $\text{CH}_2$ ), 2.08–2.12 (m, 2H,  $\text{CH}_2$ );  $^{13}\text{C}$  NMR (100 MHz,  $\text{CDCl}_3$ ):  $\delta$  = 189.0, 164.1, 153.3, 136.3, 132.9, 131.6, 131.3, 127.2, 123.4, 111.8, 36.9, 25.0, 22.0; HRMS (ESI-TOF):  $m/z$  calcd for  $\text{C}_{13}\text{H}_{12}\text{BrN}_2\text{OS}$  [(M+H) $^+$ ], 322.9848; found, 322.9846.

#### 2-imino-3-phenyl-2,3,5,6-tetrahydrobenzo[d]thiazol-7(4H)-one (4h)

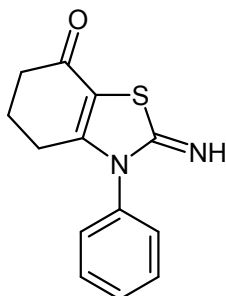

Yellow solid; Mp 129–130 °C; IR (KBr): 3322, 1641, 1609, 1417, 1359, 1058, 744  $\text{cm}^{-1}$ ;  $^1\text{H}$  NMR (400 MHz,  $\text{CDCl}_3$ ):  $\delta$  = 7.50–7.58 (m, 3H, ArH), 7.32 (d,  $J$  = 8.0 Hz, 2H, ArH), 2.52–2.55 (m, 2H,  $\text{CH}_2$ ), 2.34–2.37 (m, 2H,  $\text{CH}_2$ ), 2.08–2.11 (m, 2H,  $\text{CH}_2$ );  $^{13}\text{C}$  NMR (100 MHz,  $\text{CDCl}_3$ ):  $\delta$  = 189.1, 164.7, 154.0, 134.9, 130.2, 129.8, 128.3, 111.3, 36.9, 25.0, 22.0; HRMS (ESI-TOF):  $m/z$  calcd for  $\text{C}_{13}\text{H}_{13}\text{N}_2\text{OS}$  [(M+H) $^+$ ], 245.0743; found, 245.0742.

#### 2-imino-3-(p-tolyl)-2,3,5,6-tetrahydrobenzo[d]thiazol-7(4H)-one (4i)

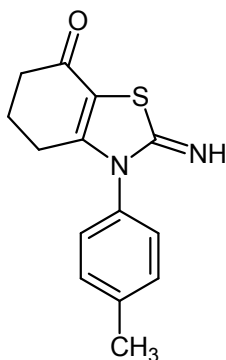

White solid; Mp 148–149 °C; IR (KBr): 3285, 1620, 1568, 1416, 1358, 1068, 814  $\text{cm}^{-1}$ ;  $^1\text{H}$  NMR (400 MHz,  $\text{CDCl}_3$ ):  $\delta$  = 7.34 (d,  $J$  = 8.0 Hz, 2H, ArH), 7.19 (d,  $J$  = 8.0 Hz, 2H, ArH), 2.50–2.53 (m, 2H,  $\text{CH}_2$ ), 2.42 (s, 3H,  $\text{CH}_3$ ), 2.34–2.37 (m, 2H,  $\text{CH}_2$ ), 2.07–2.10 (m, 2H,  $\text{CH}_2$ );  $^{13}\text{C}$  NMR (100 MHz,  $\text{CDCl}_3$ ):  $\delta$  = 189.1, 164.8, 154.3, 140.0, 132.2, 130.8, 128.0, 111.1, 36.9, 24.9, 21.9, 21.3; HRMS (ESI-TOF):  $m/z$  calcd for  $\text{C}_{14}\text{H}_{15}\text{N}_2\text{OS}$  [(M+H) $^+$ ], 259.0900; found, 259.0899.

**2-imino-3-(*m*-tolyl)-2,3,5,6-tetrahydrobenzo[*d*]thiazol-7(4*H*)-one (4j)**

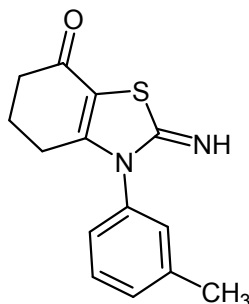

Light yellow solid; Mp 154–156 °C; IR (KBr): 3196, 1596, 1408, 1361, 1312, 1195, 1009  $\text{cm}^{-1}$ ;  $^1\text{H}$  NMR (400 MHz,  $\text{CDCl}_3$ ):  $\delta$  = 7.43 (t,  $J$  = 8.0 Hz, 1H, ArH), 7.30 (d,  $J$  = 8.0 Hz, 1H, ArH), 7.09–7.13 (m, 2H, ArH), 2.51–2.54 (m, 2H,  $\text{CH}_2$ ), 2.42 (s, 3H,  $\text{CH}_3$ ), 2.34–2.37 (m, 2H,  $\text{CH}_2$ ), 2.07–2.11 (m, 2H,  $\text{CH}_2$ );  $^{13}\text{C}$  NMR (100 MHz,  $\text{CDCl}_3$ ):  $\delta$  = 189.1, 164.8, 154.2, 140.4, 134.8, 130.6, 130.0, 128.8, 125.3, 111.1, 36.9, 25.0, 22.0, 21.4; HRMS (ESI-TOF):  $m/z$  calcd for  $\text{C}_{14}\text{H}_{15}\text{N}_2\text{OS}$  [(M+H) $^+$ ], 259.0900; found, 259.0900.

**2-imino-3-(*o*-tolyl)-2,3,5,6-tetrahydrobenzo[*d*]thiazol-7(4*H*)-one (4k)**

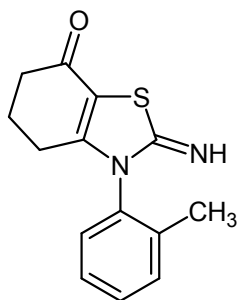

Yellow oily liquid; IR (KBr): 3245, 1647, 1594, 1404, 1354, 1196, 1003  $\text{cm}^{-1}$ ;  $^1\text{H}$  NMR (400 MHz,  $\text{CDCl}_3$ ):  $\delta$  = 7.34–7.42 (m, 3H, ArH), 7.21 (d,  $J$  = 8.0 Hz, 1H, ArH), 2.52–2.56 (m, 2H,  $\text{CH}_2$ ), 2.22 (m, 3H,  $\text{CH}_3$ ), 2.17–2.21 (m, 1H,  $\text{CH}_2$ ), 2.04–2.11 (m, 3H,  $\text{CH}_2$ );  $^{13}\text{C}$  NMR (100 MHz,  $\text{CDCl}_3$ ):  $\delta$  = 188.8, 164.1, 154.0, 136.7, 133.8, 131.8, 130.3, 128.7, 127.8, 111.5, 36.9, 24.5, 22.0, 17.4; HRMS (ESI-TOF):  $m/z$  calcd for  $\text{C}_{14}\text{H}_{15}\text{N}_2\text{OS}$



[(M+H)<sup>+</sup>], 259.0900; found, 259.0900.

**2-imino-3-(4-methoxyphenyl)-2,3,5,6-tetrahydrobenzo[*d*]thiazol-7(4*H*)-one (4l)**

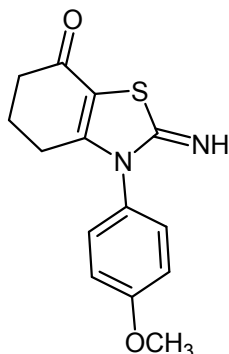

Yellow solid; Mp 146–148 °C; IR (KBr): 3257, 1639, 1512, 1361, 1246, 1075, 1008 cm<sup>-1</sup>; <sup>1</sup>H NMR (400 MHz, DMSO-*d*<sub>6</sub>): δ = 8.70 (br, 1H, C=NH), 7.31 (d, *J* = 8.8 Hz, 2H, Ar*H*), 7.06 (d, *J* = 8.8 Hz, 2H, Ar*H*), 3.80 (s, 3H, OCH<sub>3</sub>), 2.39 (t, *J* = 6.0 Hz, 2H, CH<sub>2</sub>), 2.31 (t, *J* = 6.0 Hz, 2H, CH<sub>2</sub>), 1.93–1.99 (m, 2H, CH<sub>2</sub>); <sup>13</sup>C NMR (100 MHz, DMSO-*d*<sub>6</sub>): δ = 188.9, 161.3, 159.8, 156.1, 130.3, 128.4, 115.1, 109.2, 55.9, 36.9, 24.9, 21.9; HRMS (ESI-TOF): *m/z* calcd for C<sub>14</sub>H<sub>15</sub>N<sub>2</sub>O<sub>2</sub>S [(M+H)<sup>+</sup>], 275.0849; found, 275.0842.

**2-imino-5,5-dimethyl-3-(4-nitrophenyl)-2,3,5,6-tetrahydrobenzo[*d*]thiazol-7(4*H*)-one (4m)**

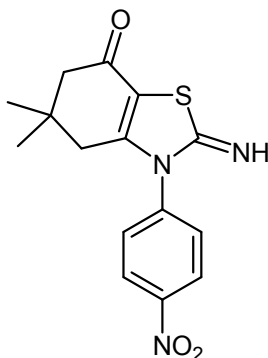

Yellow solid; Mp 142–143 °C; IR (KBr): 3289, 1638, 1520, 1404, 1342, 1042, 738 cm<sup>-1</sup>; <sup>1</sup>H NMR (400 MHz, CDCl<sub>3</sub>): δ = 8.41 (d, *J* = 8.0 Hz, 2H, Ar*H*), 7.55 (t, *J* = 4.0 Hz, 2H, Ar*H*), 2.43 (s, 2H, CH<sub>2</sub>), 2.26 (s, 2H, CH<sub>2</sub>), 1.12 (s, 6H, 2 × CH<sub>3</sub>); <sup>13</sup>C NMR (100 MHz, CDCl<sub>3</sub>): δ = 188.5, 163.6, 150.7, 147.9, 140.8, 129.7, 111.4, 50.9, 38.8, 34.7, 28.4; HRMS (ESI-TOF): *m/z* calcd for C<sub>15</sub>H<sub>16</sub>N<sub>3</sub>O<sub>3</sub>S [(M+H)<sup>+</sup>], 318.0907; found, 318.0908.

**3-(4-fluorophenyl)-2-imino-5,5-dimethyl-2,3,5,6-tetrahydrobenzo[*d*]thiazol-7(4*H*)-one (4n)**

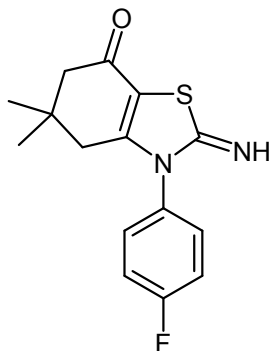

Yellow solid; Mp 148–149 °C; IR (KBr): 3218, 1648, 1510, 1351, 1226, 1157, 1048  $\text{cm}^{-1}$ ;  $^1\text{H}$  NMR (400 MHz,  $\text{CDCl}_3$ ):  $\delta$  = 7.29–7.33 (m, 2H, ArH), 7.23–7.27 (m, 2H, ArH), 2.41 (s, 2H,  $\text{CH}_2$ ), 2.21 (s, 2H,  $\text{CH}_2$ ), 1.10 (s, 6H,  $2 \times \text{CH}_3$ );  $^{13}\text{C}$  NMR (100 MHz,  $\text{CDCl}_3$ ):  $\delta$  = 188.6, 164.7, 162.8 (d,  $^1J_{\text{C-F}} = 249.0$  Hz), 130.9 (d,  $^3J_{\text{C-F}} = 3.0$  Hz), 130.4, 130.3, 117.4 (d,  $^2J_{\text{C-F}} = 22.0$  Hz), 117.2 (d,  $^2J_{\text{C-F}} = 22.0$  Hz), 110.1, 50.9, 38.6, 34.4, 28.4; HRMS (ESI-TOF):  $m/z$  calcd for  $\text{C}_{15}\text{H}_{16}\text{FN}_2\text{OS}$  [(M+H) $^+$ ], 291.0962; found, 291.0962.

**3-(3-fluorophenyl)-2-imino-5,5-dimethyl-2,3,5,6-tetrahydrobenzo[d]thiazol-7(4H)-one (4o)**

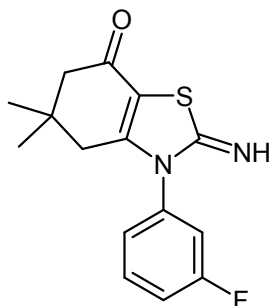

Yellow solid; Mp 180–182 °C; IR (KBr): 3296, 1612, 1492, 1361, 1225, 1045, 740  $\text{cm}^{-1}$ ;  $^1\text{H}$  NMR (400 MHz,  $\text{CDCl}_3$ ):  $\delta$  = 7.56 (t,  $J = 8.0$  Hz, 1H, ArH), 7.22 (t,  $J = 8.0$  Hz, 2H, ArH), 7.12 (AB,  $J = 8.0$  Hz, 1H, ArH), 7.07 (AB,  $J = 8.0$  Hz, 1H, ArH), 2.41 (s, 2H,  $\text{CH}_2$ ), 2.23 (s, 2H,  $\text{CH}_2$ ), 1.11 (s, 6H,  $2 \times \text{CH}_3$ );  $^{13}\text{C}$  NMR (100 MHz,  $\text{CDCl}_3$ ):  $\delta$  = 188.6, 164.3, 163.0 (d,  $^1J_{\text{C-F}} = 236.0$  Hz), 151.8, 136.3, 131.3 (d,  $^3J_{\text{C-F}} = 9.0$  Hz), 124.3, 117.9 (d,  $^2J_{\text{C-F}} = 19.0$  Hz), 116.2 (d,  $^2J_{\text{C-F}} = 23.0$  Hz), 110.3, 50.9, 38.6, 34.5, 28.4; HRMS (ESI-TOF):  $m/z$  calcd for  $\text{C}_{15}\text{H}_{16}\text{FN}_2\text{OS}$  [(M+H) $^+$ ], 291.0962; found, 291.0962.

**3-(4-chlorophenyl)-2-imino-5,5-dimethyl-2,3,5,6-tetrahydrobenzo[d]thiazol-7(4H)-one (4p)**

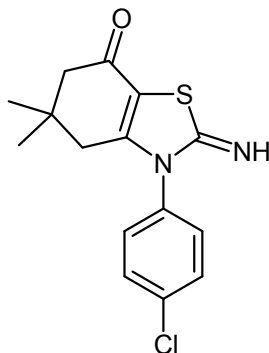

Yellow solid; Mp 129–130 °C; IR (KBr): 3283, 1646, 1491, 1351, 1322, 1089, 1018  $\text{cm}^{-1}$ ;  $^1\text{H}$  NMR (400 MHz,  $\text{CDCl}_3$ ):  $\delta$  = 7.53 (d,  $J$  = 8.0 Hz, 2H, ArH), 7.26 (d,  $J$  = 8.4 Hz, 2H, ArH), 2.41 (s, 2H,  $\text{CH}_2$ ), 2.21 (s, 2H,  $\text{CH}_2$ ), 1.10 (s, 6H, 2  $\times$   $\text{CH}_3$ );  $^{13}\text{C}$  NMR (100 MHz,  $\text{CDCl}_3$ ):  $\delta$  = 188.6, 164.5, 151.9, 135.7, 133.5, 130.4, 129.8, 110.3, 50.9, 38.7, 34.5, 28.4; HRMS (ESI-TOF):  $m/z$  calcd for  $\text{C}_{15}\text{H}_{16}\text{ClN}_2\text{OS}$  [(M+H) $^+$ ], 307.0666; found, 307.0665.

**3-(3-chlorophenyl)-2-imino-5,5-dimethyl-2,3,5,6-tetrahydrobenzo[d]thiazol-7(4H)-one (4q)**

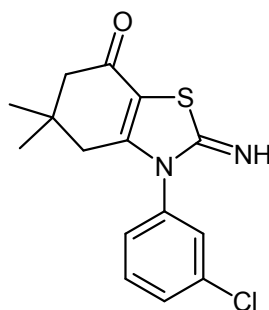

Yellow solid; Mp 98–99 °C; IR (KBr): 3252, 1649, 1480, 1411, 1361, 1044, 864  $\text{cm}^{-1}$ ;  $^1\text{H}$  NMR (400 MHz,  $\text{CDCl}_3$ ):  $\delta$  = 7.47–7.51 (m, 2H, ArH), 7.34 (s, 1H, ArH), 7.21–7.24 (m, 1H, ArH), 2.39 (s, 2H,  $\text{CH}_2$ ), 2.23 (s, 2H,  $\text{CH}_2$ ), 1.10 (s, 6H, 2  $\times$   $\text{CH}_3$ );  $^{13}\text{C}$  NMR (100 MHz,  $\text{CDCl}_3$ ):  $\delta$  = 188.5, 164.1, 151.8, 135.5, 135.4, 131.1, 129.9, 128.8, 126.8, 110.3, 50.9, 38.6, 34.5, 28.4; HRMS (ESI-TOF):  $m/z$  calcd for  $\text{C}_{15}\text{H}_{16}\text{ClN}_2\text{OS}$  [(M+H) $^+$ ], 307.0666; found, 307.0665.

**3-(2-chlorophenyl)-2-imino-5,5-dimethyl-2,3,5,6-tetrahydrobenzo[d]thiazol-7(4H)-one (4r)**

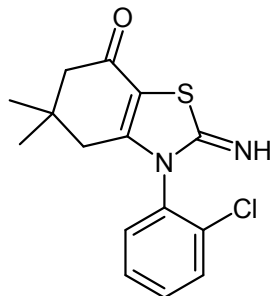

Yellow brown solid; Mp 138–140 °C; IR (KBr): 3311, 1643, 1590, 1410, 1351, 1039, 749  $\text{cm}^{-1}$ ;  $^1\text{H}$  NMR (400 MHz,  $\text{CDCl}_3$ ):  $\delta$  = 7.60–7.63 (m, 1H, ArH), 7.46–7.50 (m, 2H, ArH), 7.38–7.41 (m, 1H, ArH), 2.37–2.42 (m, 2H,  $\text{CH}_2$ ), 2.06–2.11 (m, 2H,  $\text{CH}_2$ ), 1.11 (s, 3H,  $\text{CH}_3$ ), 1.08 (s, 3H,  $\text{CH}_3$ );  $^{13}\text{C}$  NMR (100 MHz,  $\text{CDCl}_3$ ):  $\delta$  = 188.6, 163.5, 152.3, 133.2, 132.8, 131.5, 131.0, 130.9, 128.6, 110.3, 51.0, 38.0, 34.4, 28.9, 27.9; HRMS (ESI-TOF):  $m/z$  calcd for  $\text{C}_{15}\text{H}_{16}\text{ClN}_2\text{OS}$  [(M+H) $^+$ ], 307.0666; found, 307.0667.

**3-(4-bromophenyl)-2-imino-5,5-dimethyl-2,3,5,6-tetrahydrobenzo[d]thiazol-7(4H)-one (4s)**

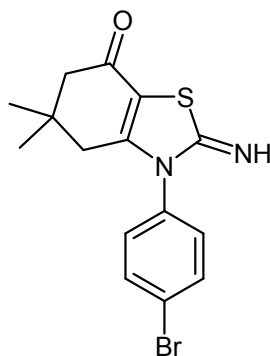

Yellow solid; Mp 115–117 °C; IR (KBr): 3208, 1649, 1602, 1512, 1255, 1048, 848  $\text{cm}^{-1}$ ;  $^1\text{H}$  NMR (400 MHz,  $\text{DMSO}-d_6$ ):  $\delta$  = 7.77 (d,  $J$  = 8.4 Hz, 2H, ArH), 7.41 (d,  $J$  = 8.4 Hz, 2H, ArH), 2.34 (s, 2H,  $\text{CH}_2$ ), 2.28 (s, 2H,  $\text{CH}_2$ ), 1.11 (s, 6H,  $2 \times \text{CH}_3$ );  $^{13}\text{C}$  NMR (100 MHz,  $\text{DMSO}-d_6$ ):  $\delta$  = 188.8, 162.5, 153.4, 134.7, 133.2, 133.0, 131.3, 123.1, 109.6, 50.8, 39.4, 34.6, 28.2; HRMS (ESI-TOF):  $m/z$  calcd for  $\text{C}_{15}\text{H}_{16}\text{BrN}_2\text{OS}$  [(M+H) $^+$ ], 351.0161; found, 351.0161.

**3-(3-bromophenyl)-2-imino-5,5-dimethyl-2,3,5,6-tetrahydrobenzo[d]thiazol-7(4H)-one (4t)**

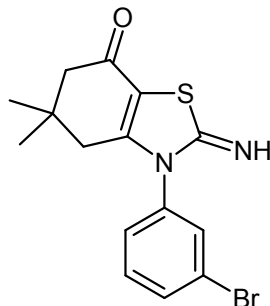

Yellow solid; Mp 103–104 °C; IR (KBr): 3259, 1614, 1572, 1479, 1361, 1043, 689  $\text{cm}^{-1}$ ;  $^1\text{H}$  NMR (400 MHz,  $\text{CDCl}_3$ ):  $\delta$  = 7.63–7.66 (m, 1H, ArH), 7.42–7.48 (m, 2H, ArH), 7.25–7.28 (m, 1H, ArH), 2.41 (s, 2H,  $\text{CH}_2$ ), 2.21 (s, 2H,  $\text{CH}_2$ ), 1.11 (s, 6H, 2  $\times$   $\text{CH}_3$ );  $^{13}\text{C}$  NMR (100 MHz,  $\text{CDCl}_3$ ):  $\delta$  = 188.6, 164.4, 151.7, 136.3, 132.9, 131.6, 131.3, 127.3, 123.4, 110.5, 50.9, 38.7, 34.5, 28.4; HRMS (ESI-TOF):  $m/z$  calcd for  $\text{C}_{15}\text{H}_{16}\text{BrN}_2\text{OS}$  [(M+H) $^+$ ], 351.0161; found, 351.0159.

**2-imino-5,5-dimethyl-3-phenyl-2,3,5,6-tetrahydrobenzo[d]thiazol-7(4H)-one (4u)**

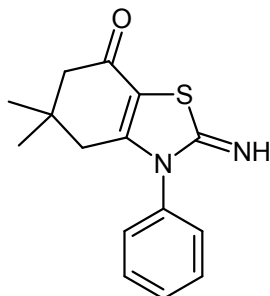

Light yellow solid; Mp 142–144 °C; IR (KBr): 3281, 1646, 1573, 1359, 1320, 1044, 740  $\text{cm}^{-1}$ ;  $^1\text{H}$  NMR (400 MHz,  $\text{CDCl}_3$ ):  $\delta$  = 7.53–7.57 (m, 2H, ArH), 7.48–7.50 (m, 1H, ArH), 7.31 (d,  $J$  = 8.0 Hz, 2H, ArH), 2.38 (s, 2H,  $\text{CH}_2$ ), 2.23 (s, 2H,  $\text{CH}_2$ ), 1.11 (s, 6H, 2  $\times$   $\text{CH}_3$ );  $^{13}\text{C}$  NMR (100 MHz,  $\text{CDCl}_3$ ):  $\delta$  = 188.4, 164.3, 152.5, 134.8, 130.1, 129.5, 128.4, 109.6, 50.8, 38.5, 34.3, 28.3; HRMS (ESI-TOF):  $m/z$  calcd for  $\text{C}_{15}\text{H}_{17}\text{N}_2\text{OS}$  [(M+H) $^+$ ], 273.1056; found, 273.1056.

**2-imino-5,5-dimethyl-3-(*p*-tolyl)-2,3,5,6-tetrahydrobenzo[d]thiazol-7(4H)-one (4v)**

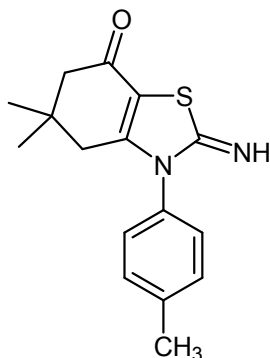

Yellow solid; Mp 147–149 °C; IR (KBr): 3298, 1648, 1511, 1410, 1349, 1047, 740  $\text{cm}^{-1}$ ;  $^1\text{H}$  NMR (400 MHz,  $\text{CDCl}_3$ ):  $\delta$  = 7.28 (d,  $J$  = 8.0 Hz, 2H, ArH), 7.09 (d,  $J$  = 8.0 Hz, 2H, ArH), 2.35 (s, 3H,  $\text{CH}_3$ ), 2.32 (s, 2H,  $\text{CH}_2$ ), 2.14 (s, 2H,  $\text{CH}_2$ ), 1.01 (s, 6H,  $2 \times \text{CH}_3$ );  $^{13}\text{C}$  NMR (100 MHz,  $\text{CDCl}_3$ ):  $\delta$  = 188.7, 165.1, 152.6, 140.0, 132.2, 130.9, 128.1, 109.7, 51.0, 38.7, 34.4, 28.4, 21.3; HRMS (ESI-TOF):  $m/z$  calcd for  $\text{C}_{16}\text{H}_{19}\text{N}_2\text{OS}$  [(M+H) $^+$ ], 287.1213; found, 287.1213.

**2-imino-5,5-dimethyl-3-(*m*-tolyl)-2,3,5,6-tetrahydrobenzo[*d*]thiazol-7(4*H*)-one (4w)**

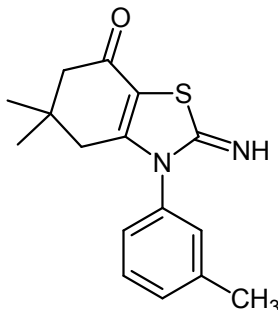

Yellow solid; Mp 99–100 °C; IR (KBr): 3120, 1640, 1614, 1399, 1248, 1150, 1046  $\text{cm}^{-1}$ ;  $^1\text{H}$  NMR (400 MHz,  $\text{CDCl}_3$ ):  $\delta$  = 7.42 (t,  $J$  = 8.0 Hz, 1H, ArH), 7.30 (t,  $J$  = 8.0 Hz, 1H, ArH), 7.06–7.10 (m, 2H, ArH), 2.43 (s, 3H,  $\text{CH}_3$ ), 2.40 (s, 2H,  $\text{CH}_2$ ), 2.20 (s, 2H,  $\text{CH}_2$ ), 1.19 (s, 6H,  $2 \times \text{CH}_3$ );  $^{13}\text{C}$  NMR (100 MHz,  $\text{CDCl}_3$ ):  $\delta$  = 188.6, 165.1, 152.5, 140.5, 134.9, 130.6, 130.0, 128.8, 125.3, 109.9, 51.0, 38.7, 34.5, 28.4, 21.4; HRMS (ESI-TOF):  $m/z$  calcd for  $\text{C}_{16}\text{H}_{19}\text{N}_2\text{OS}$  [(M+H) $^+$ ], 287.1213; found, 287.1212.

**2-imino-3-(4-methoxyphenyl)-5,5-dimethyl-2,3,5,6-tetrahydrobenzo[*d*]thiazol-7(4*H*)-one (4x)**

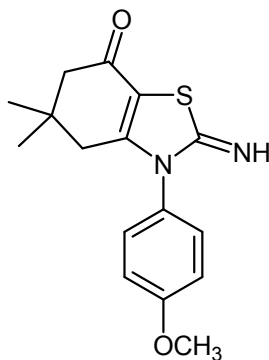

Yellow solid; Mp 98–100 °C; IR (KBr): 3219, 1637, 1511, 1351, 1248, 1169, 1026  $\text{cm}^{-1}$ ;  $^1\text{H}$  NMR (400 MHz,  $\text{DMSO-}d_6$ ):  $\delta$  = 7.29–7.33 (m, 2H, ArH), 7.08–7.12 (m, 2H, ArH), 3.84 (s, 3H,  $\text{OCH}_3$ ), 2.34 (s, 2H,  $\text{CH}_2$ ), 2.26 (s, 2H,  $\text{CH}_2$ ), 1.02 (s, 6H,  $2 \times \text{CH}_3$ );  $^{13}\text{C}$  NMR (100 MHz,  $\text{DMSO-}d_6$ ):  $\delta$  = 187.4, 160.7, 158.9, 153.2, 129.4, 127.4, 114.3, 107.0, 55.0, 49.9, 37.5, 33.4, 27.3; HRMS (ESI-TOF):  $m/z$  calcd for  $\text{C}_{16}\text{H}_{19}\text{N}_2\text{O}_2\text{S}$  [(M+H) $^+$ ], 303.1162; found, 303.1177.

**3-butyl-2-imino-5,5-dimethyl-2,3,5,6-tetrahydrobenzo[d]thiazol-7(4H)-one (4y)**

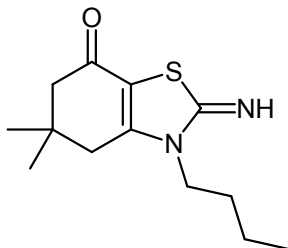

Oily liquid; IR (KBr): 2959, 1644, 1591, 1351, 1032, 924, 577  $\text{cm}^{-1}$ ;  $^1\text{H}$  NMR (400 MHz,  $\text{CDCl}_3$ ):  $\delta$  = 3.76 (t,  $J$  = 8.0 Hz, 2H,  $\text{CH}_2$ ), 2.51 (s, 2H,  $\text{CH}_2$ ), 2.38 (s, 2H,  $\text{CH}_2$ ), 1.64–1.68 (m, 2H,  $\text{CH}_2$ ), 1.35–1.41 (m, 2H,  $\text{CH}_2$ ), 1.15 (s, 6H,  $2 \times \text{CH}_3$ ), 0.96 (t,  $J$  = 8.0 Hz, 3H,  $\text{CH}_3$ );  $^{13}\text{C}$  NMR (100 MHz,  $\text{CDCl}_3$ ):  $\delta$  = 188.0, 163.7, 152.8, 108.9, 50.7, 43.8, 37.9, 34.4, 30.3, 28.6, 20.1, 13.8; HRMS (ESI-TOF):  $m/z$  calcd for  $\text{C}_{13}\text{H}_{21}\text{N}_2\text{OS}$  [(M+H) $^+$ ], 253.1369; found, 253.1361.

**Spectroscopic Data of  $\alpha$ -bromo enaminone 5**

**2-bromo-5,5-dimethyl-3-(*p*-tolylamino)cyclohex-2-enone (5)**

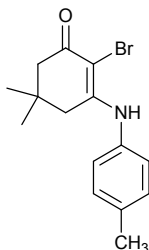

White solid;  $^1\text{H}$  NMR (400 MHz,  $\text{DMSO-}d_6$ ):  $\delta$  = 7.28 (s, 1H,  $\text{CH}$ ), 7.20–7.23 (m, 2H,  $\text{ArH}$ ), 7.02–7.04 (m, 2H,  $\text{ArH}$ ), 2.42 (s, 2H,  $\text{CH}_2$ ), 2.38 (s, 5H,  $\text{CH}_2+\text{CH}_3$ ), 2.26 (s, 2H,  $\text{CH}_2$ ), 1.03 (s, 6H,  $2 \times \text{CH}_3$ );  $^{13}\text{C}$  NMR (100 MHz,  $\text{DMSO-}d_6$ ):  $\delta$  = 188.0, 157.8, 137.1, 134.7, 130.1, 125.9, 96.3, 50.8, 41.1, 32.7, 28.0, 21.0; HRMS (ESI-TOF):  $m/z$  calcd for  $\text{C}_{16}\text{H}_{18}\text{BrNNaO}$  [(M+H) $^+$ ], 330.0464; found, 330.0479.

### <sup>1</sup>H NMR and <sup>13</sup>C NMR Spectra for 2-iminothiazoles 4

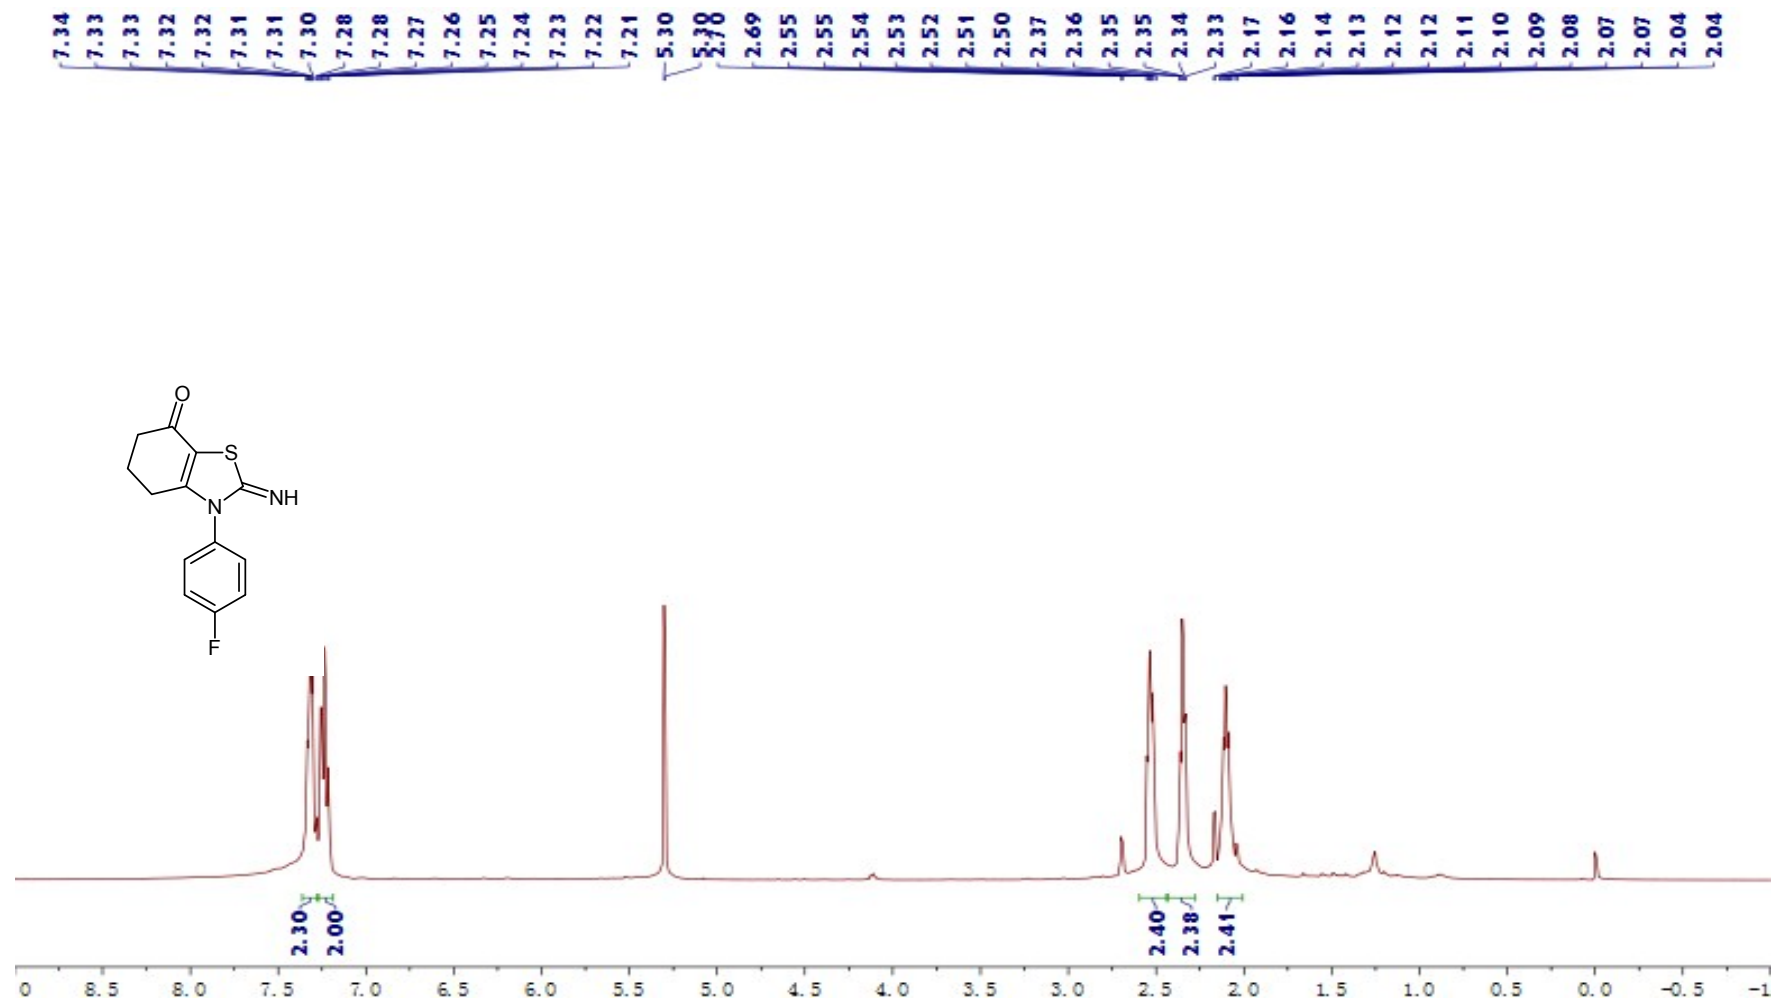

Figure 1. <sup>1</sup>H NMR (400 MHz, CDCl<sub>3</sub>) spectra of compound 4a



N-23.12.fid

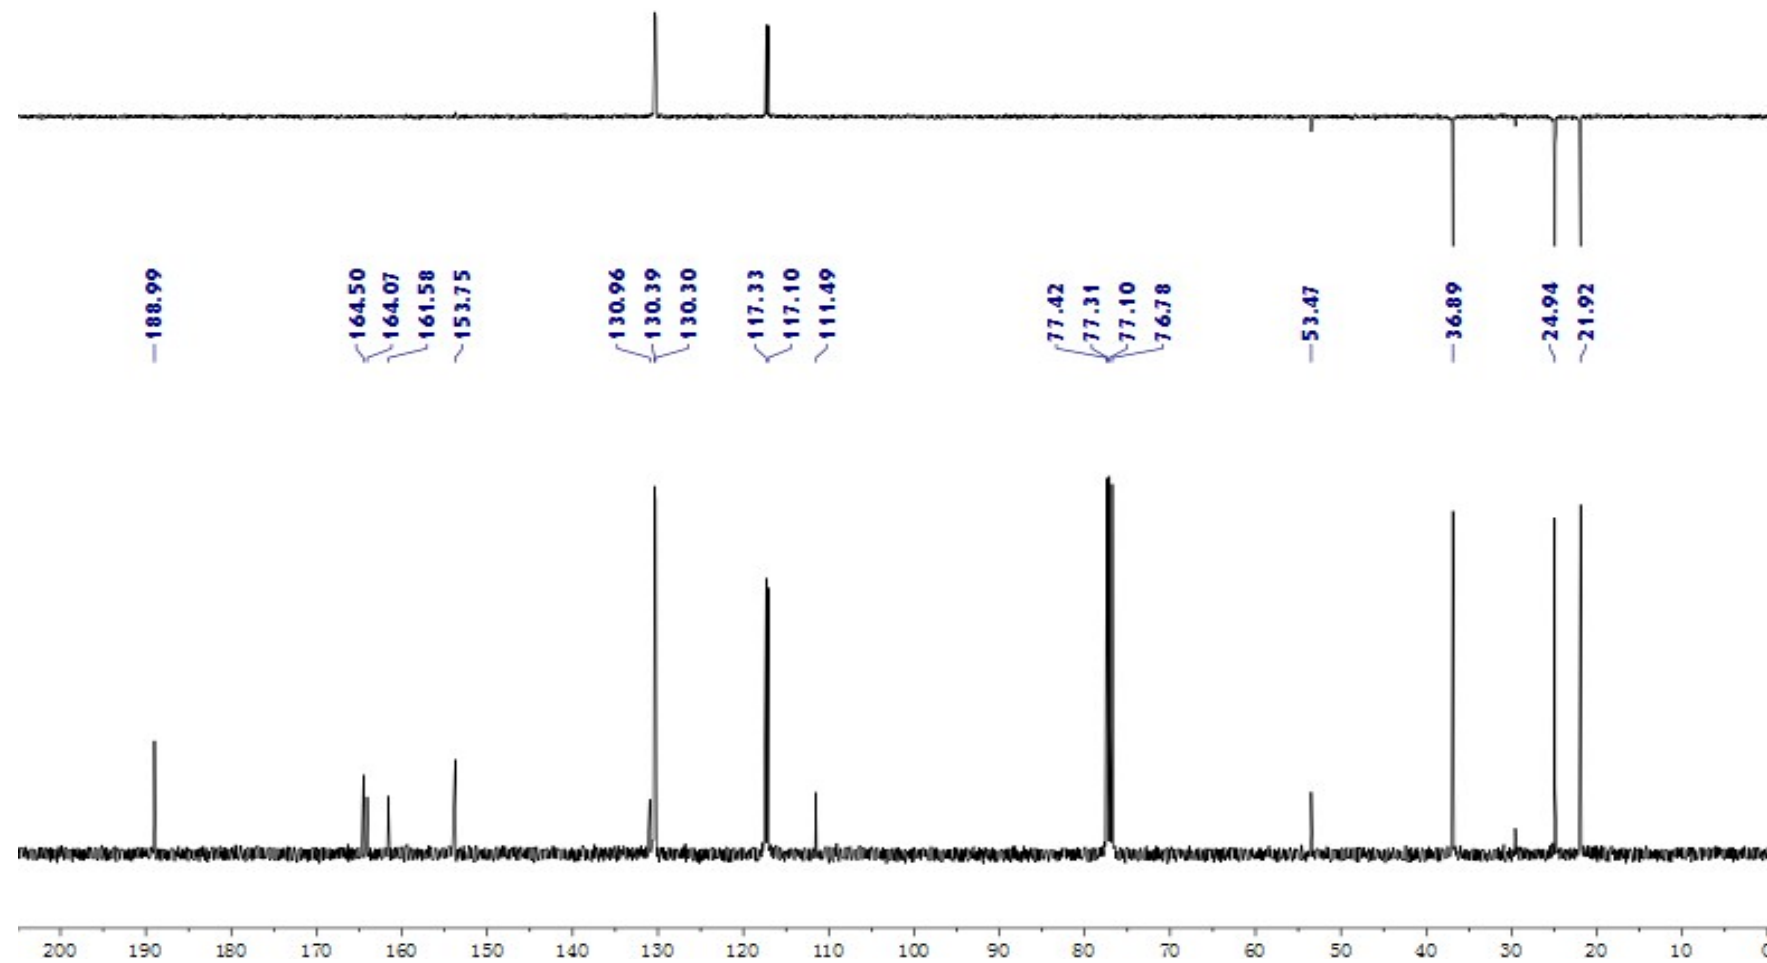

Figure 2.  $^{13}\text{C}$  NMR (400 MHz,  $\text{CDCl}_3$ ) spectra of compound 4a

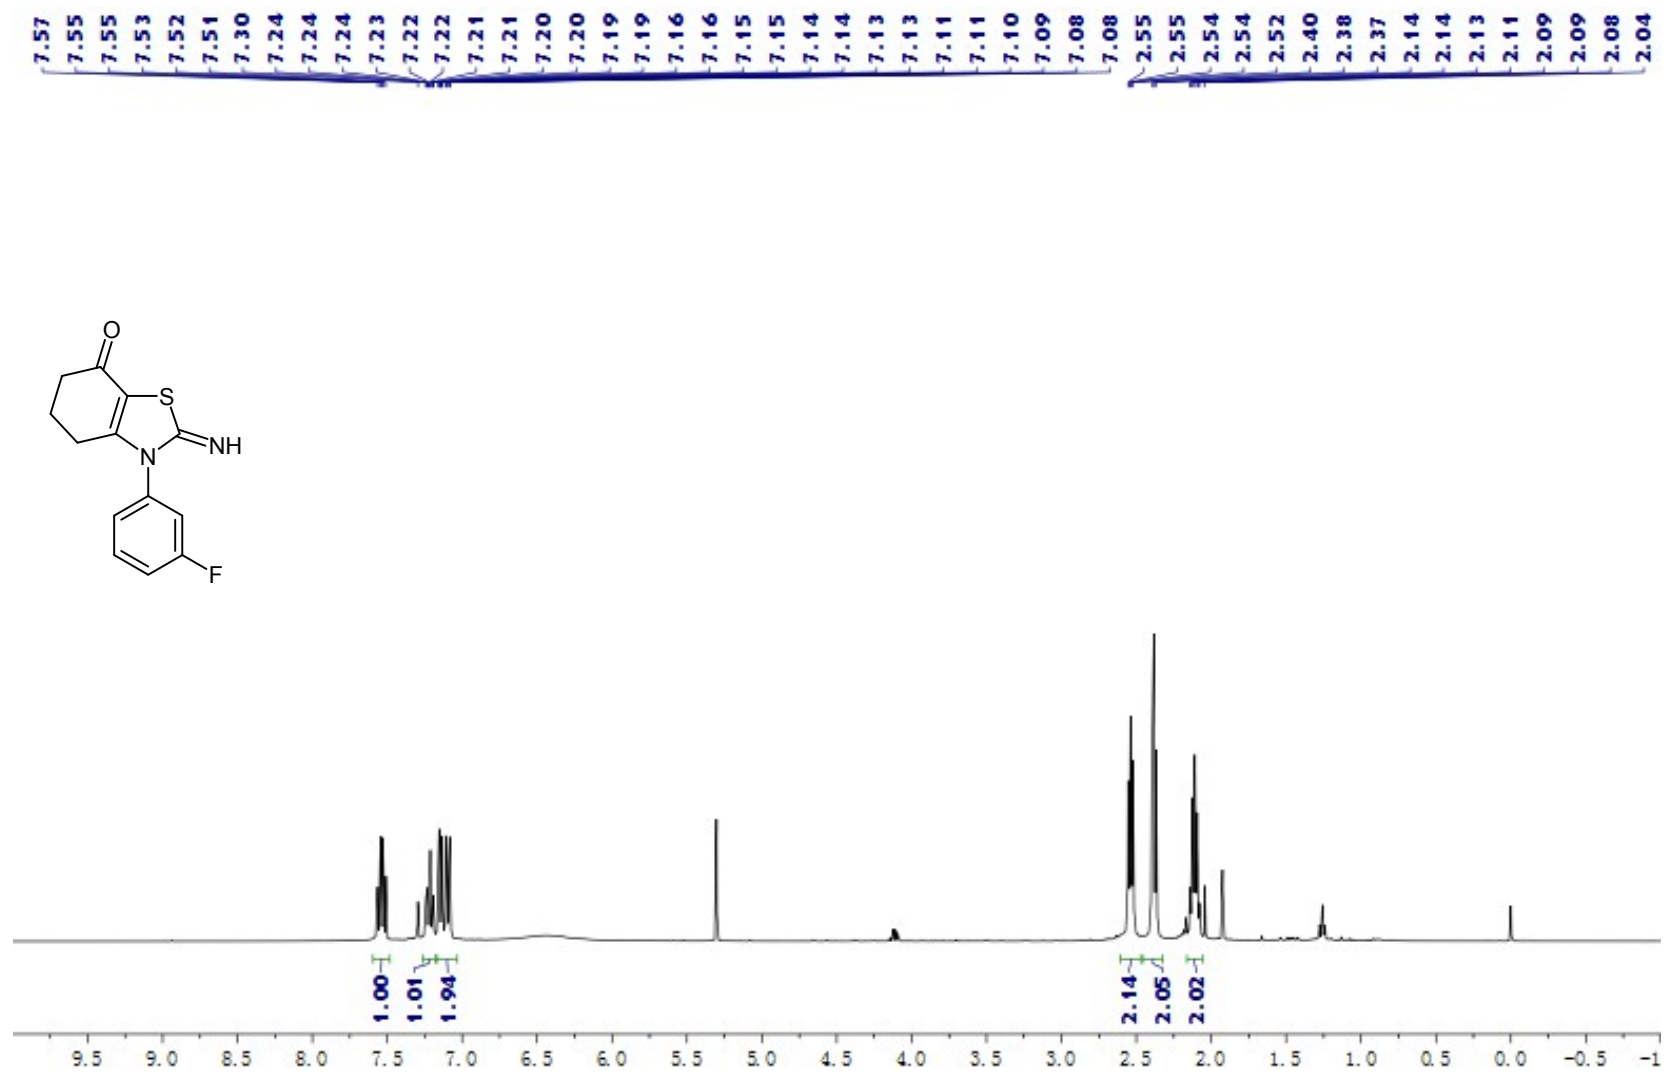

Figure 3. <sup>1</sup>H NMR (400 MHz, CDCl<sub>3</sub>) spectra of compound 4b

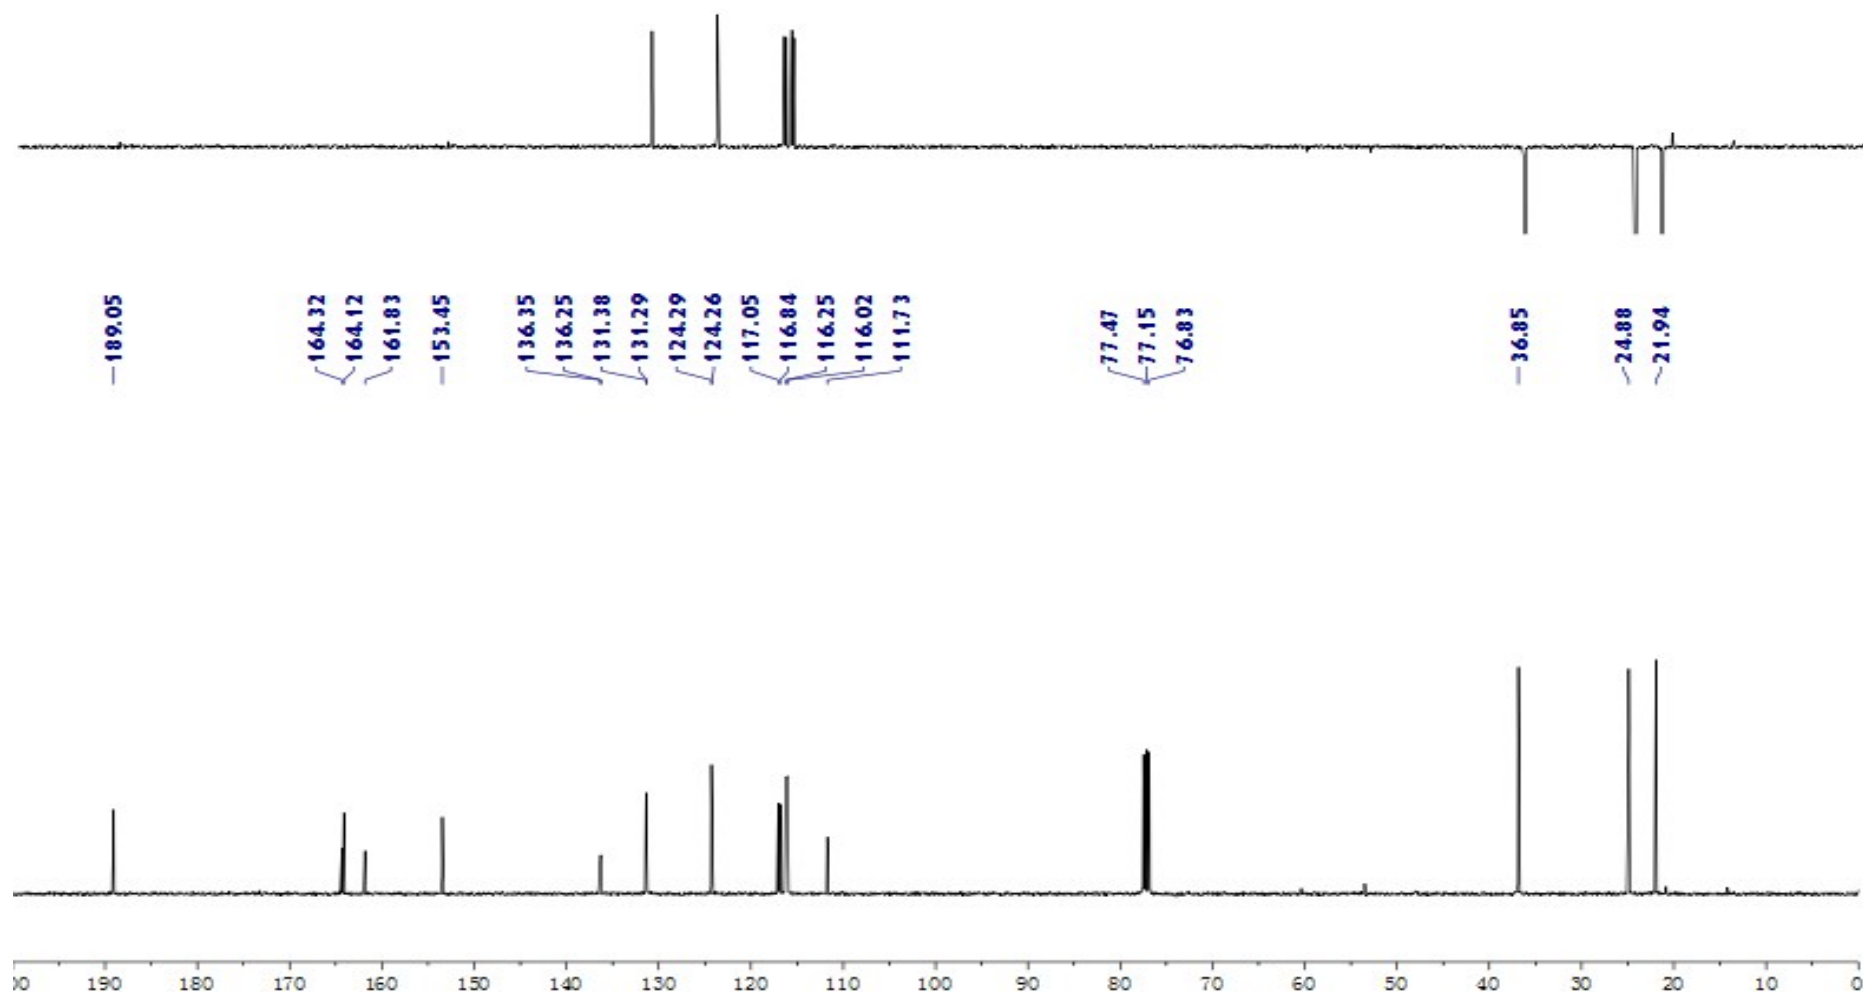

Figure 4. <sup>13</sup>C NMR (100 MHz, CDCl<sub>3</sub>) spectra of compound 4b

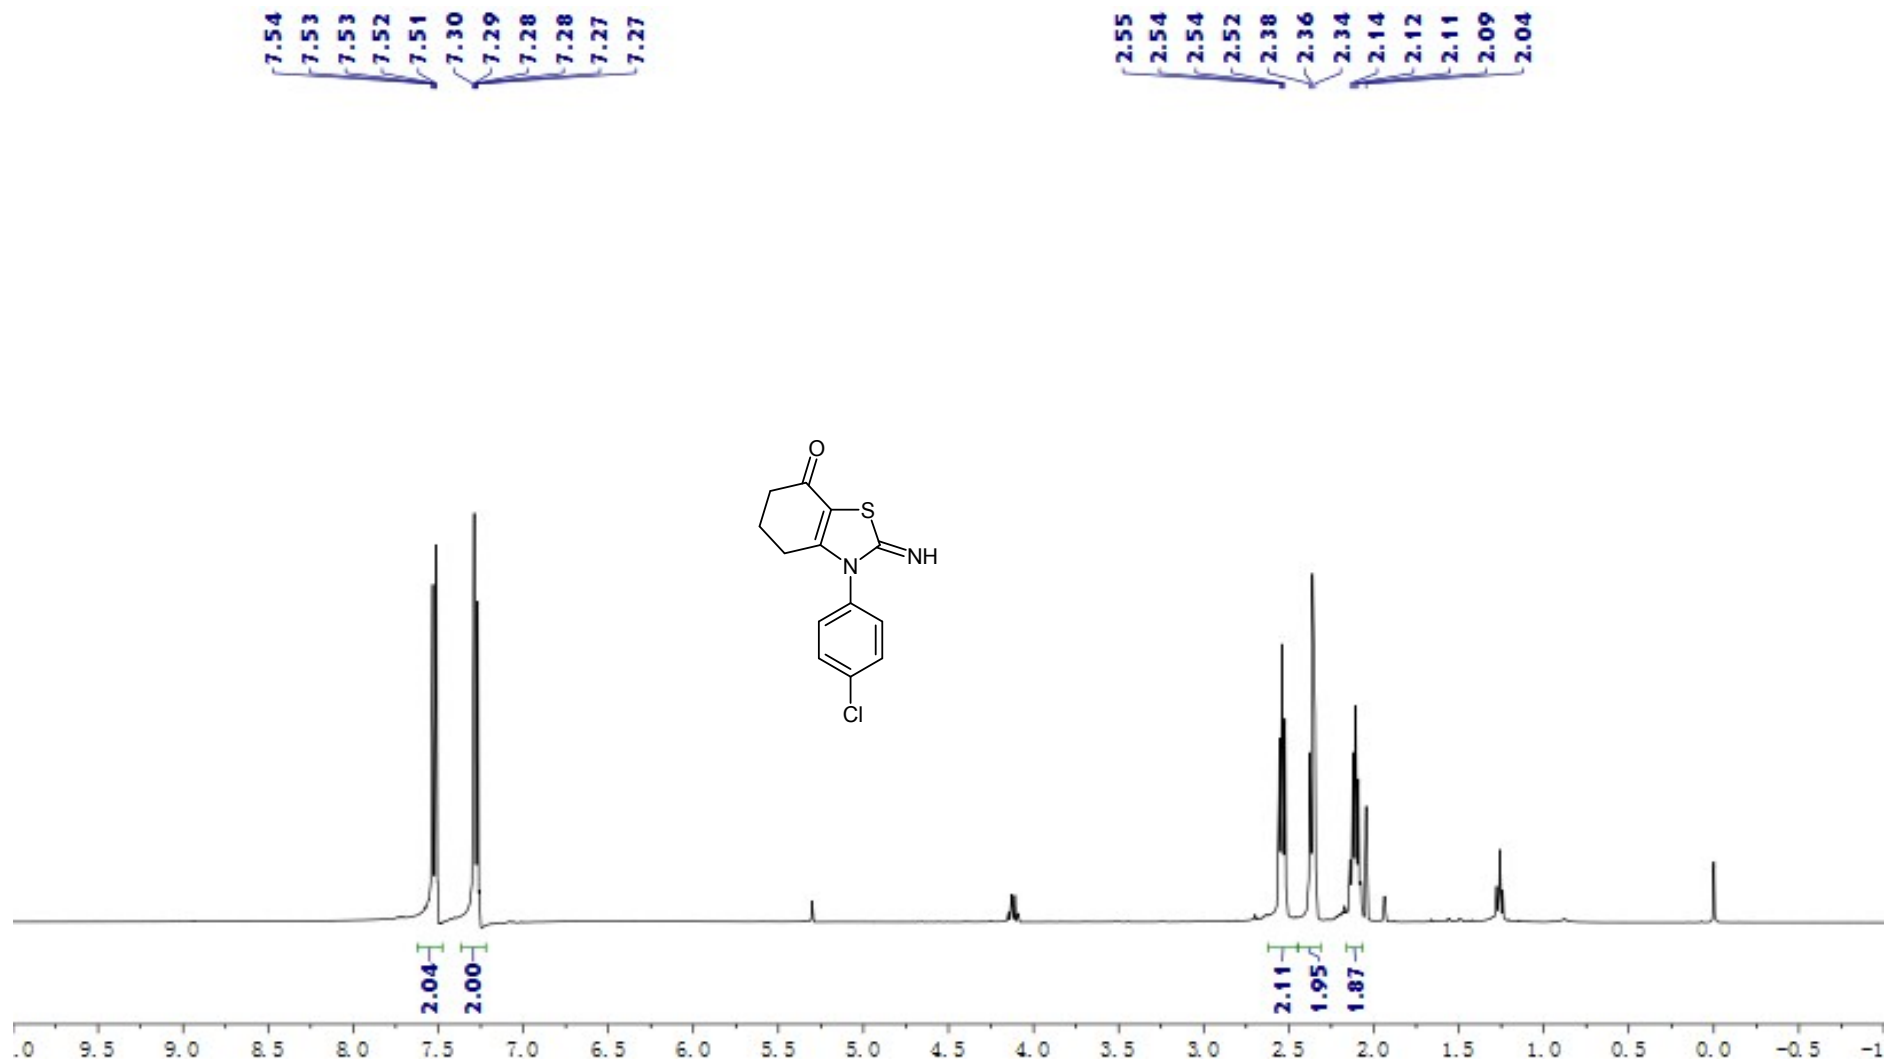

Figure 5. <sup>1</sup>H NMR (400 MHz, CDCl<sub>3</sub>) spectra of compound 4c

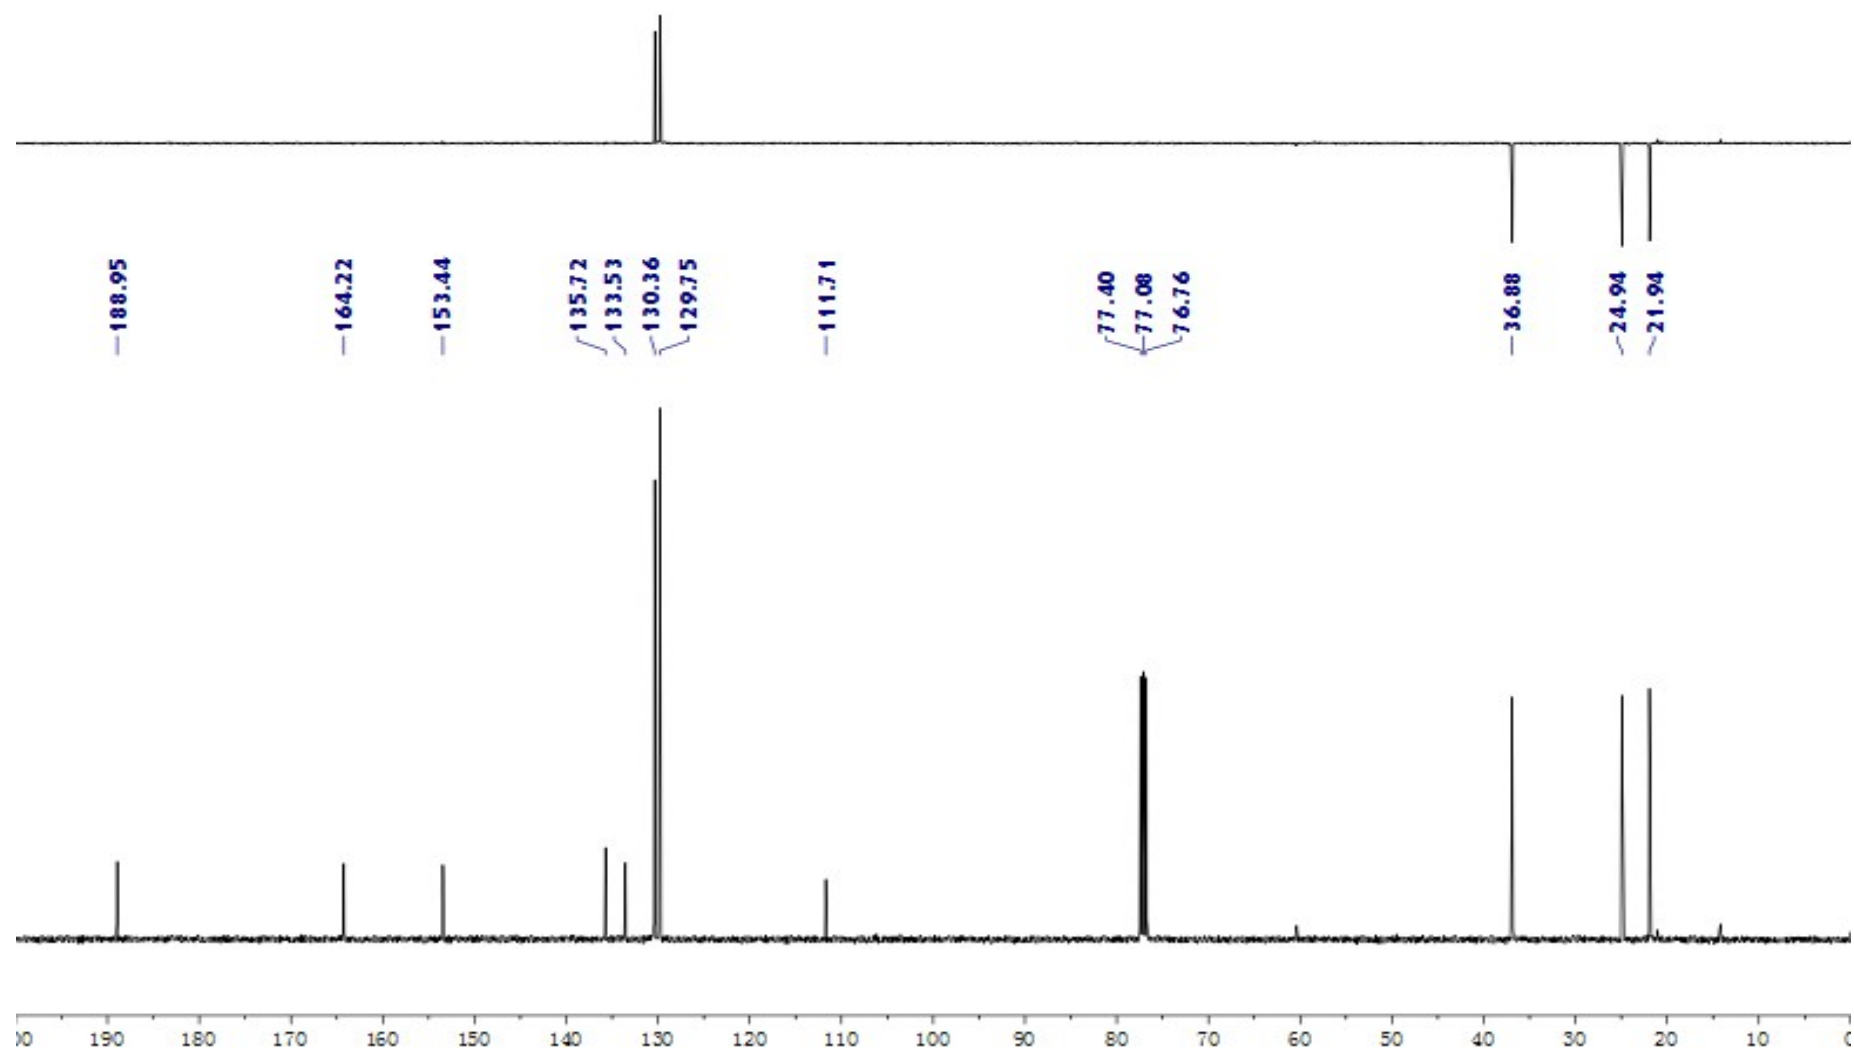

Figure 6. <sup>13</sup>C NMR (100 MHz, CDCl<sub>3</sub>) spectra of compound 4c

N-20.10.fid

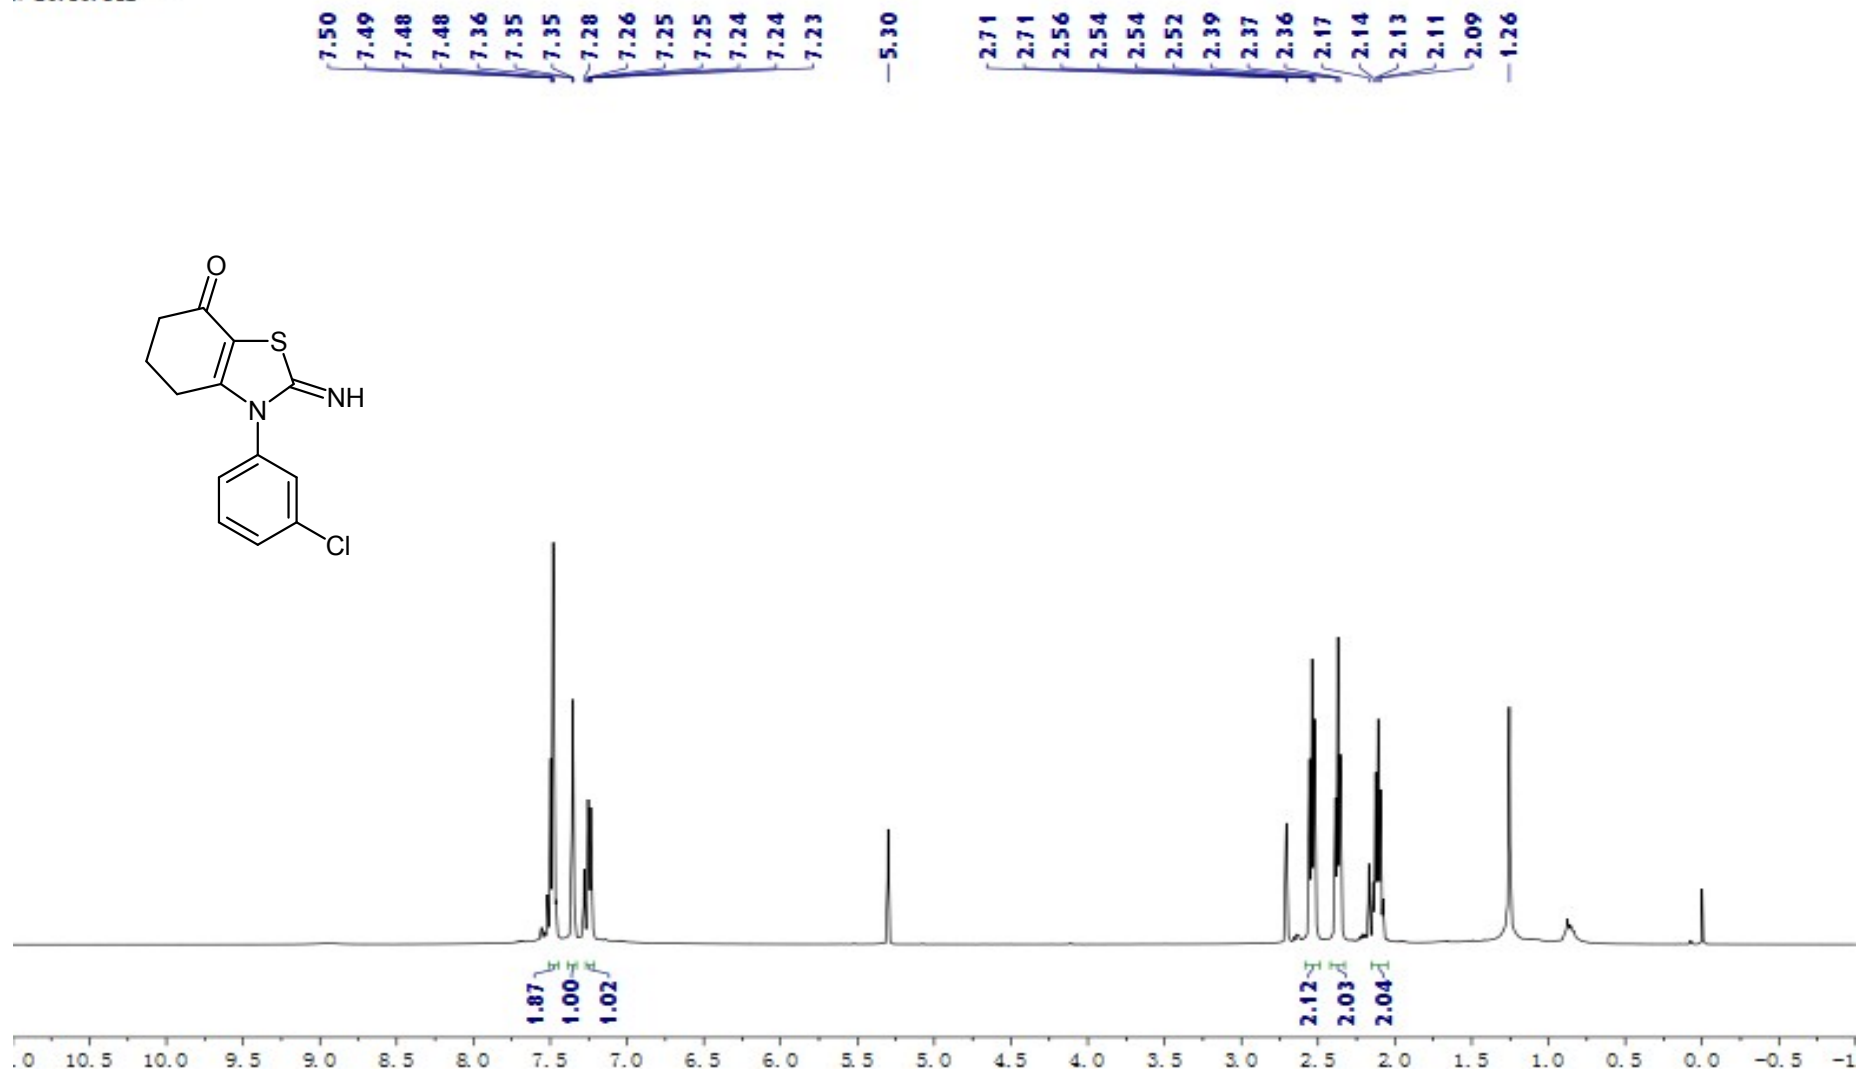

Figure 7.  $^1\text{H}$  NMR (400 MHz,  $\text{CDCl}_3$ ) spectra of compound **4d**

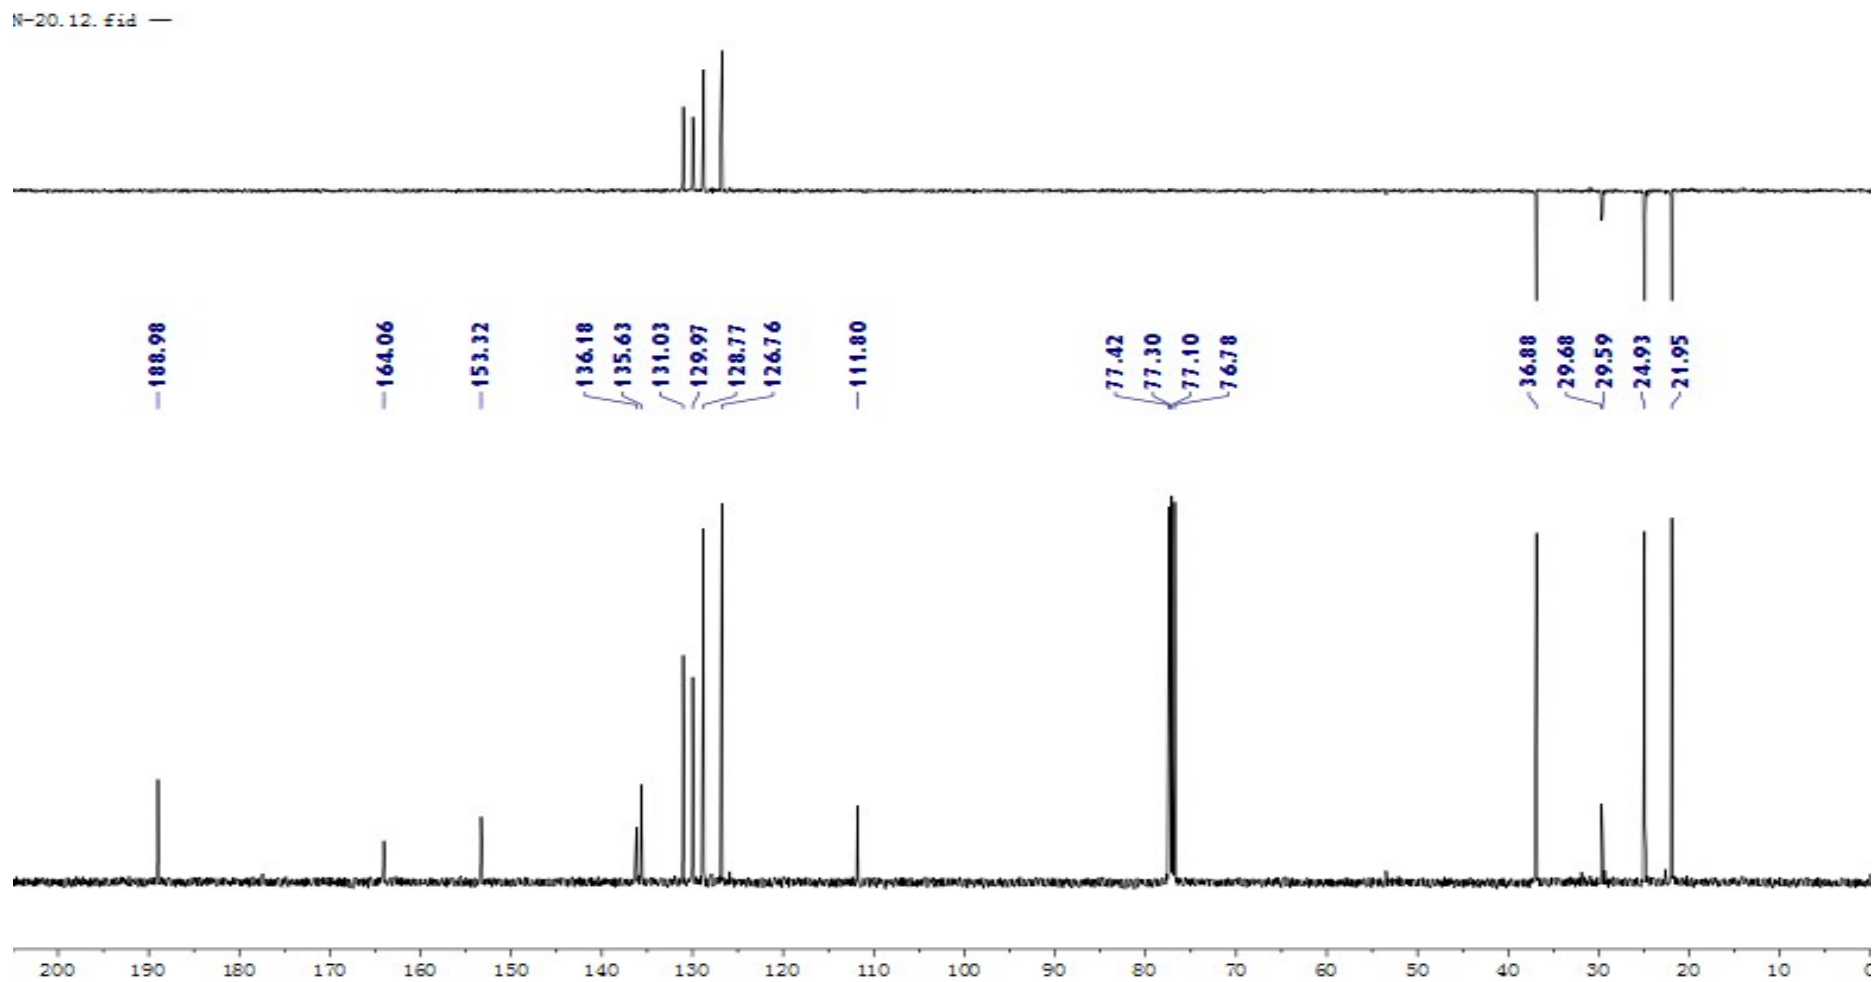

Figure 8.  $^{13}\text{C}$  NMR (100 MHz,  $\text{CDCl}_3$ ) spectra of compound 4d

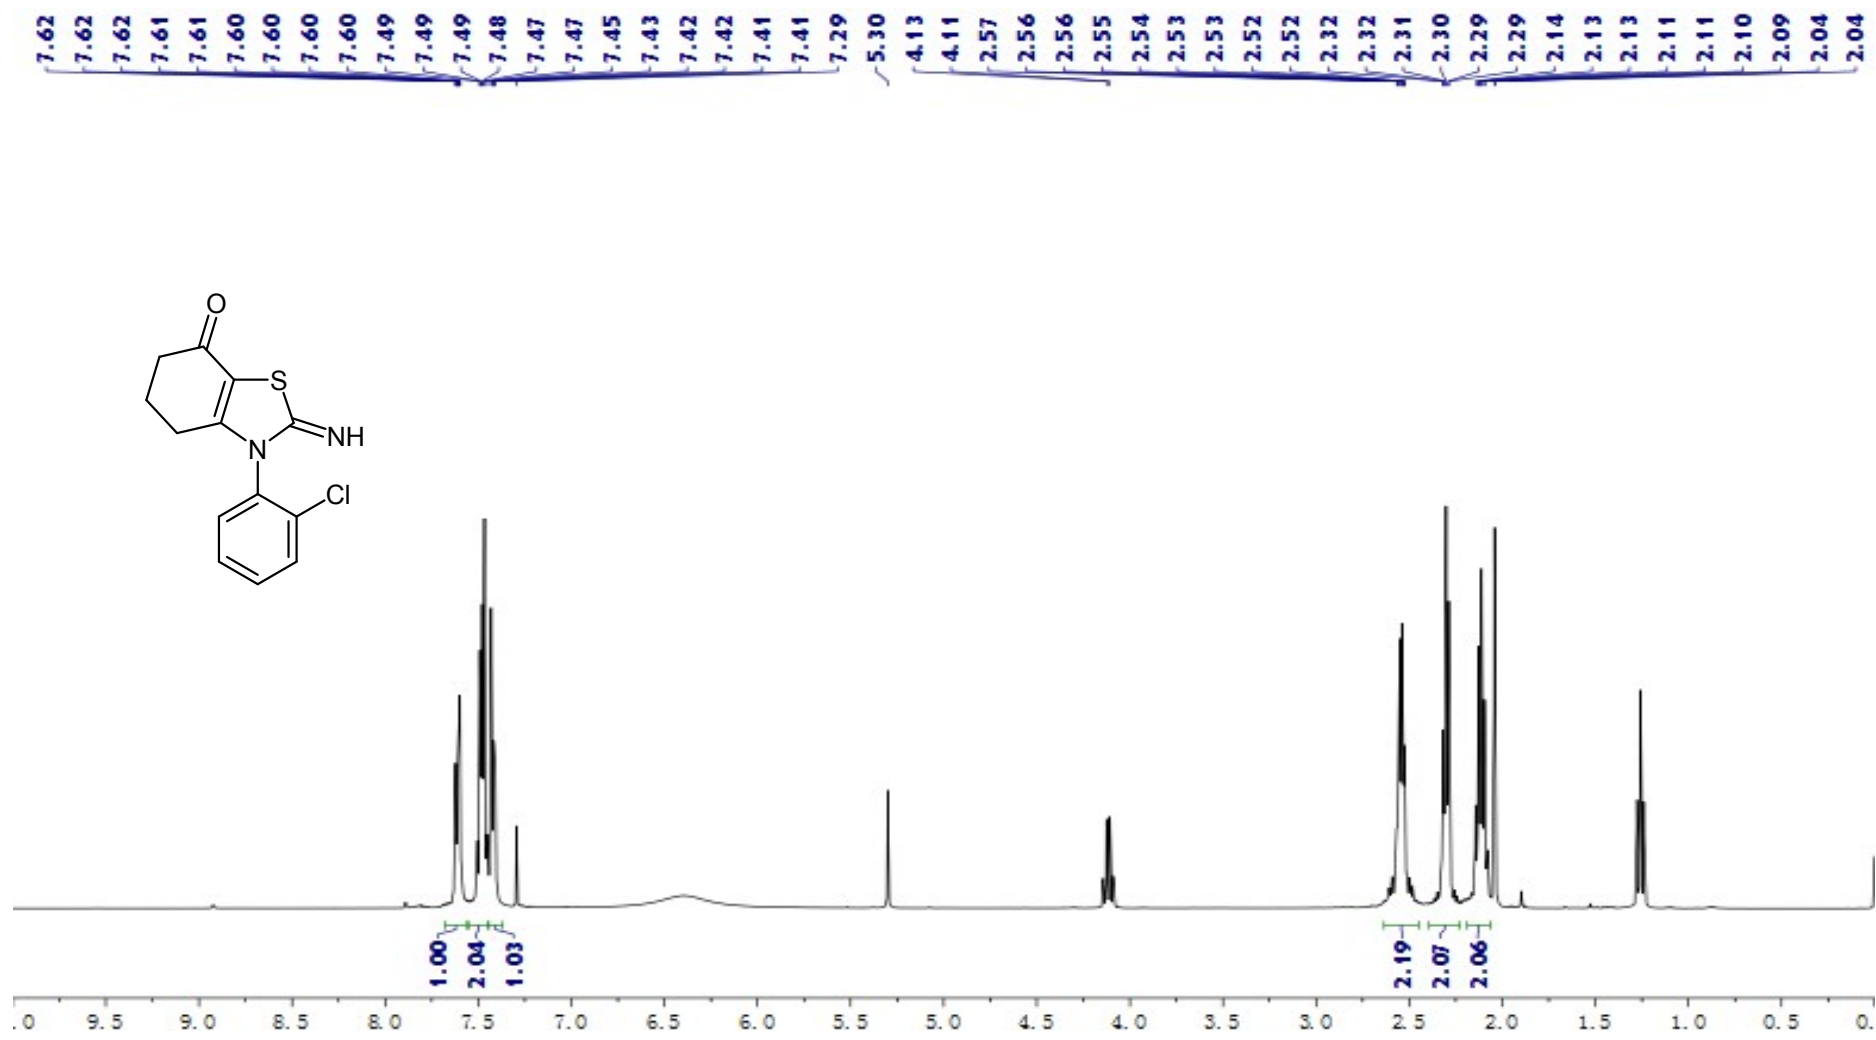

Figure 9. <sup>1</sup>H NMR (400 MHz, CDCl<sub>3</sub>) spectra of compound 4e



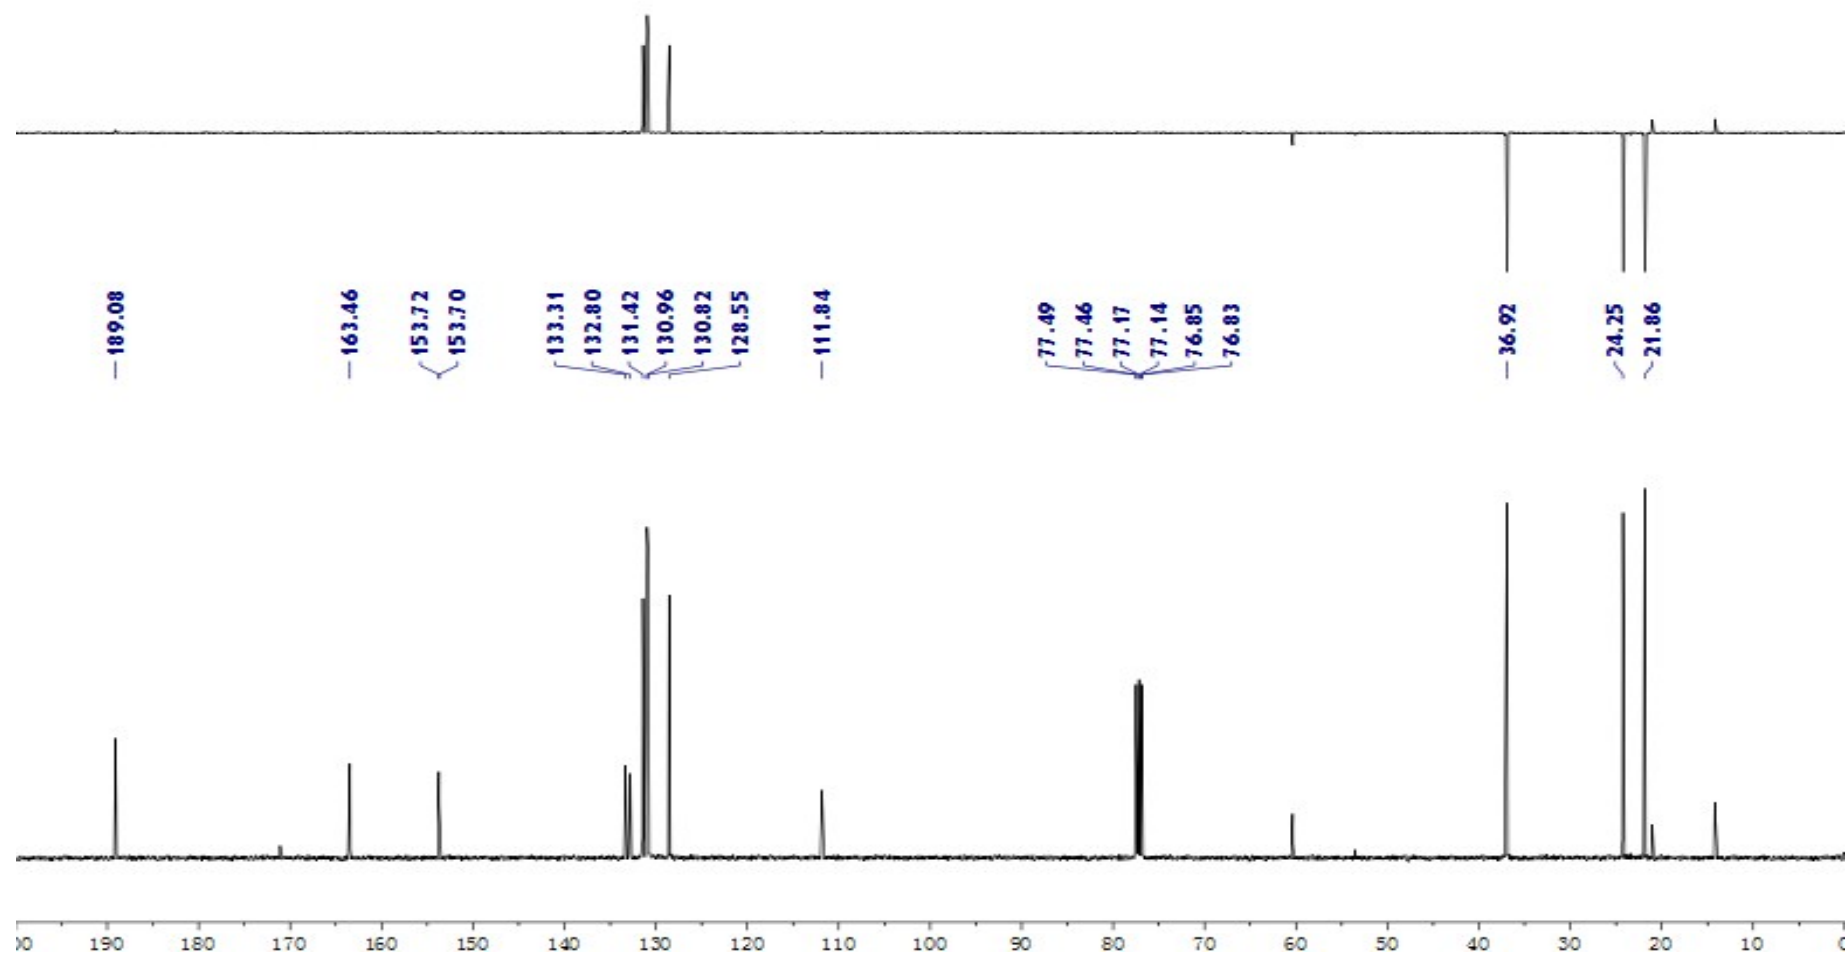

**Figure 10.**  $^{13}\text{C}$  NMR (100 MHz,  $\text{CDCl}_3$ ) spectra of compound **4e**

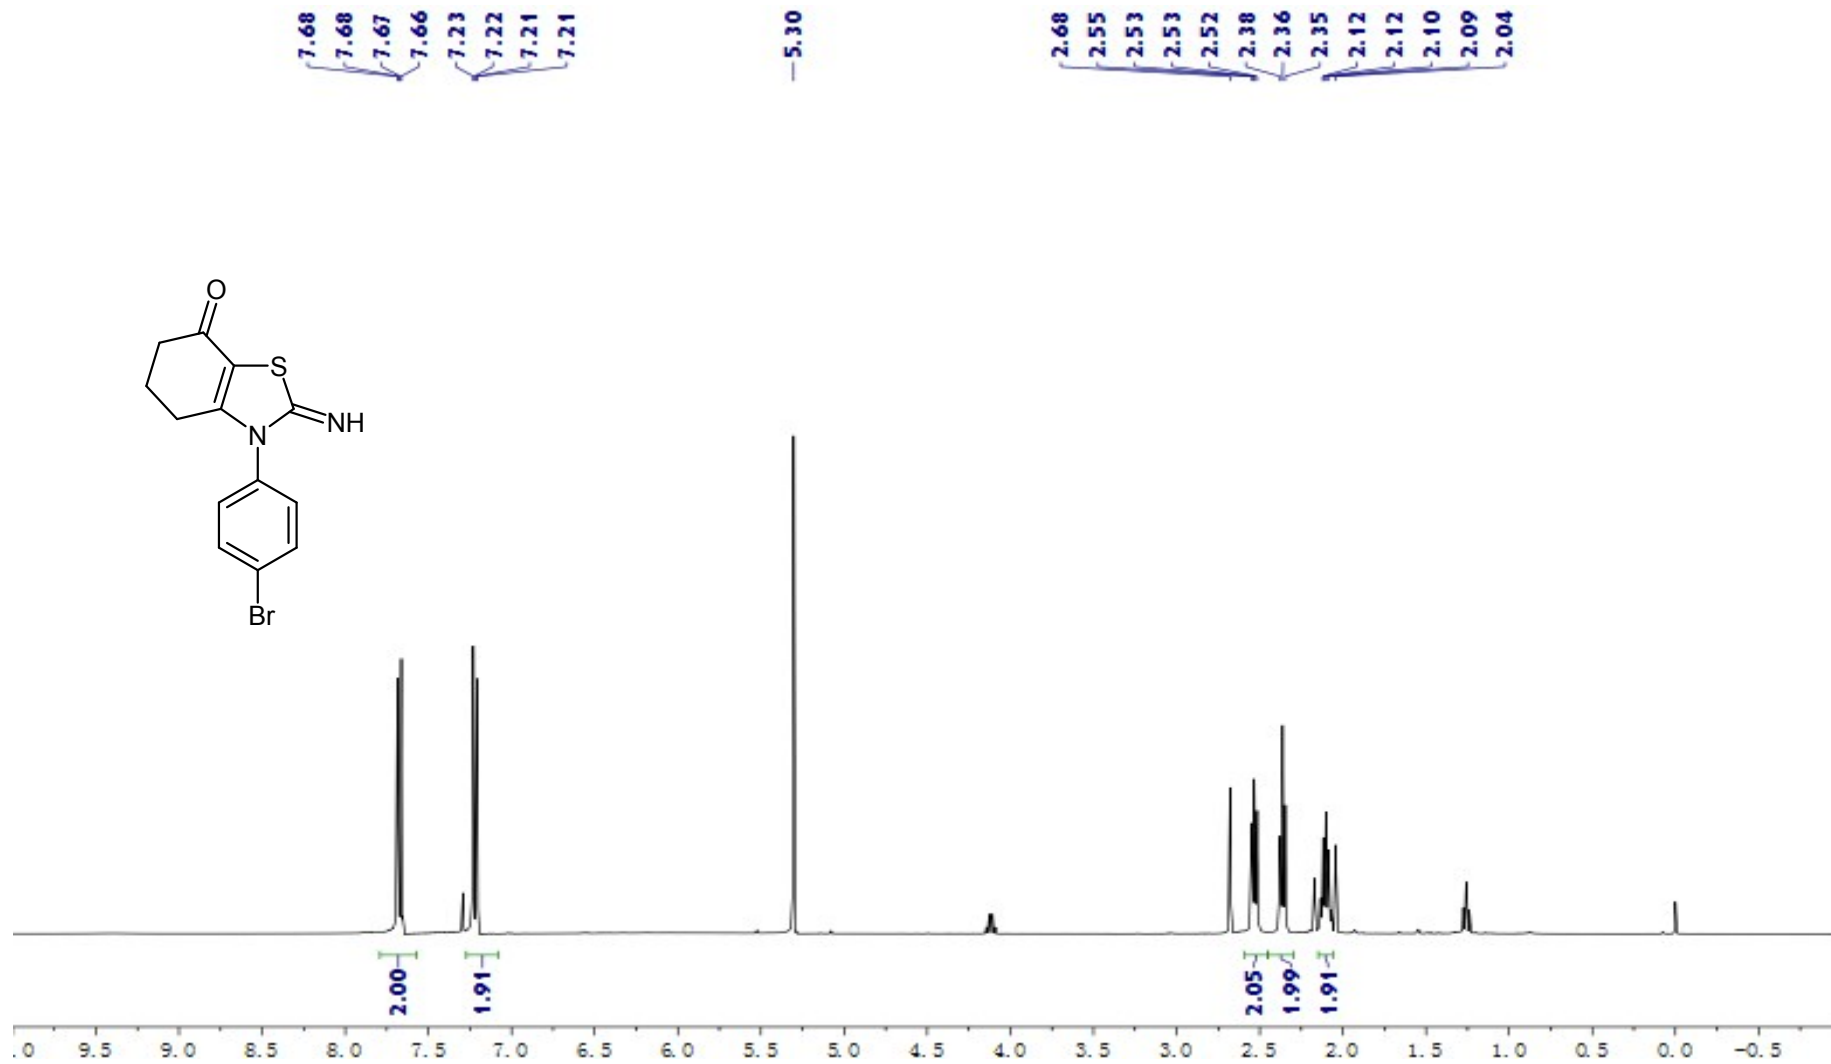

Figure 11. <sup>1</sup>H NMR (400 MHz, CDCl<sub>3</sub>) spectra of compound 4f

N-26.12.fid

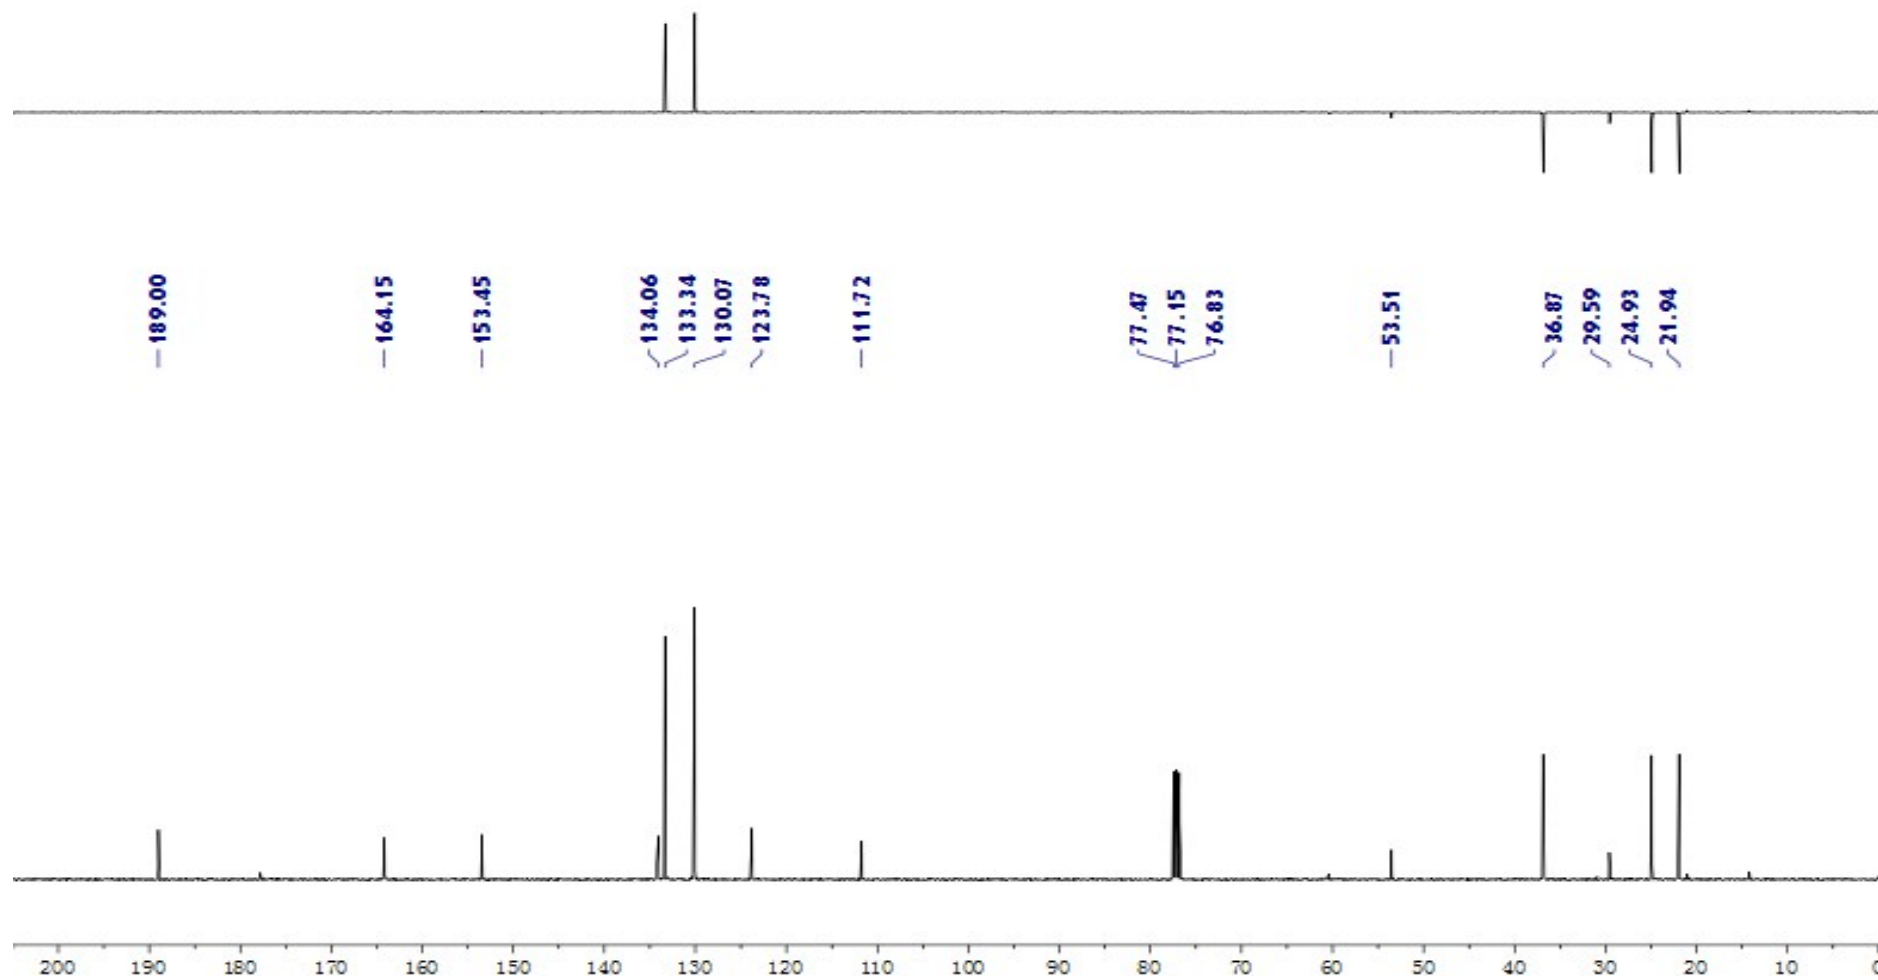

Figure 12.  $^{13}\text{C}$  NMR (100 MHz,  $\text{CDCl}_3$ ) spectra of compound 4f

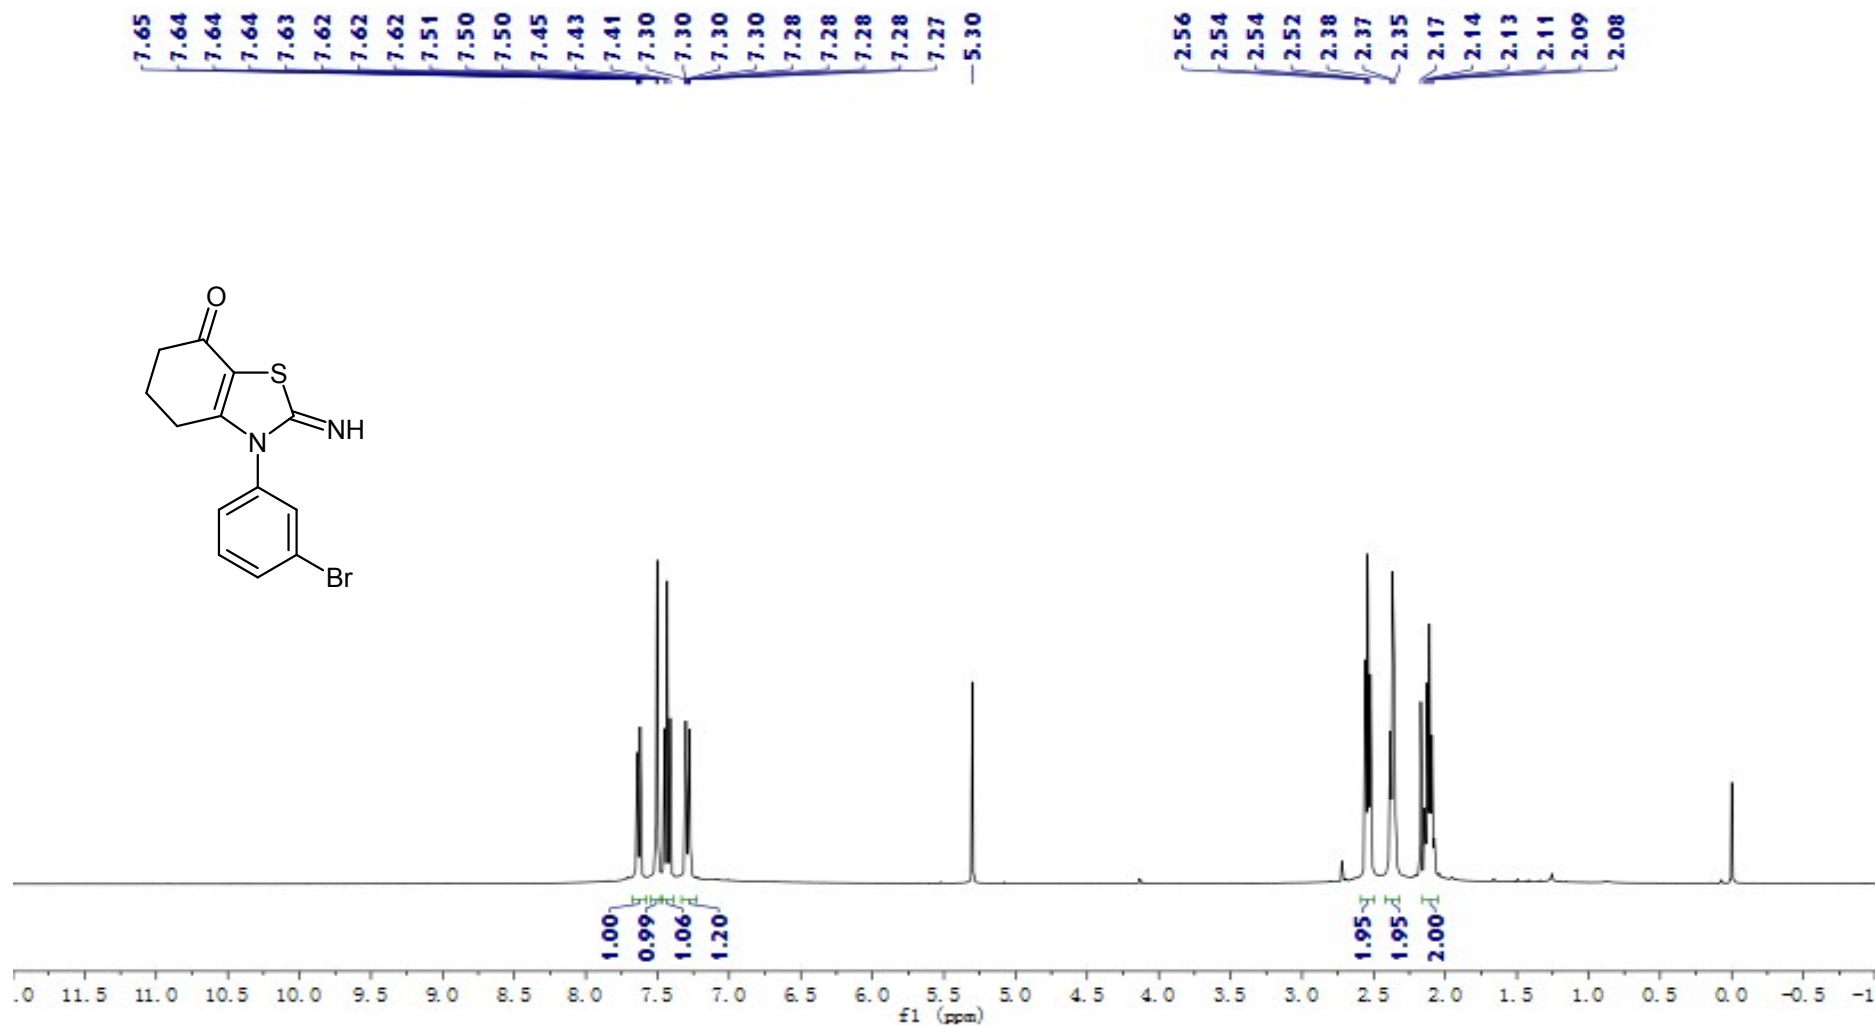

Figure 13. <sup>1</sup>H NMR (400 MHz, CDCl<sub>3</sub>) spectra of compound 4g

N-19.12.fid

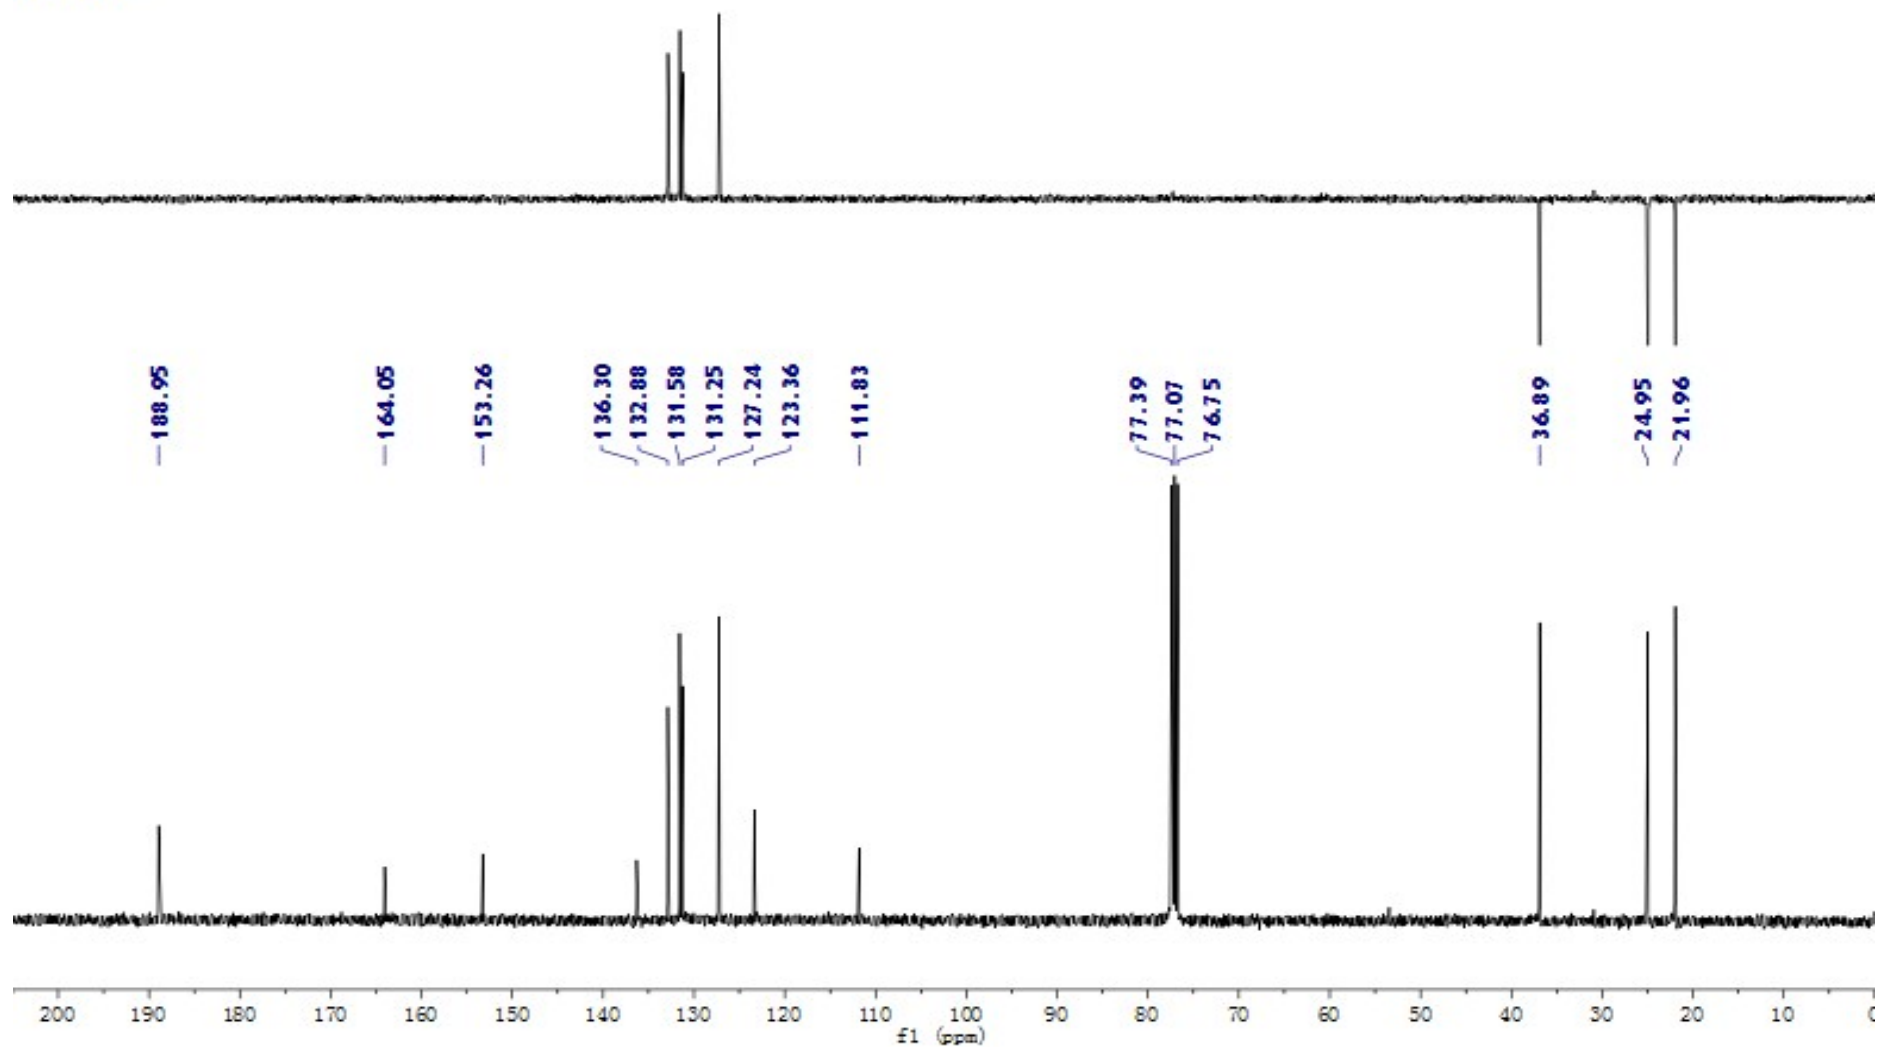

Figure 14.  $^{13}\text{C}$  NMR (100 MHz,  $\text{CDCl}_3$ ) spectra of compound **4g**

22014000178.16.fid  
N-13 CDCl3

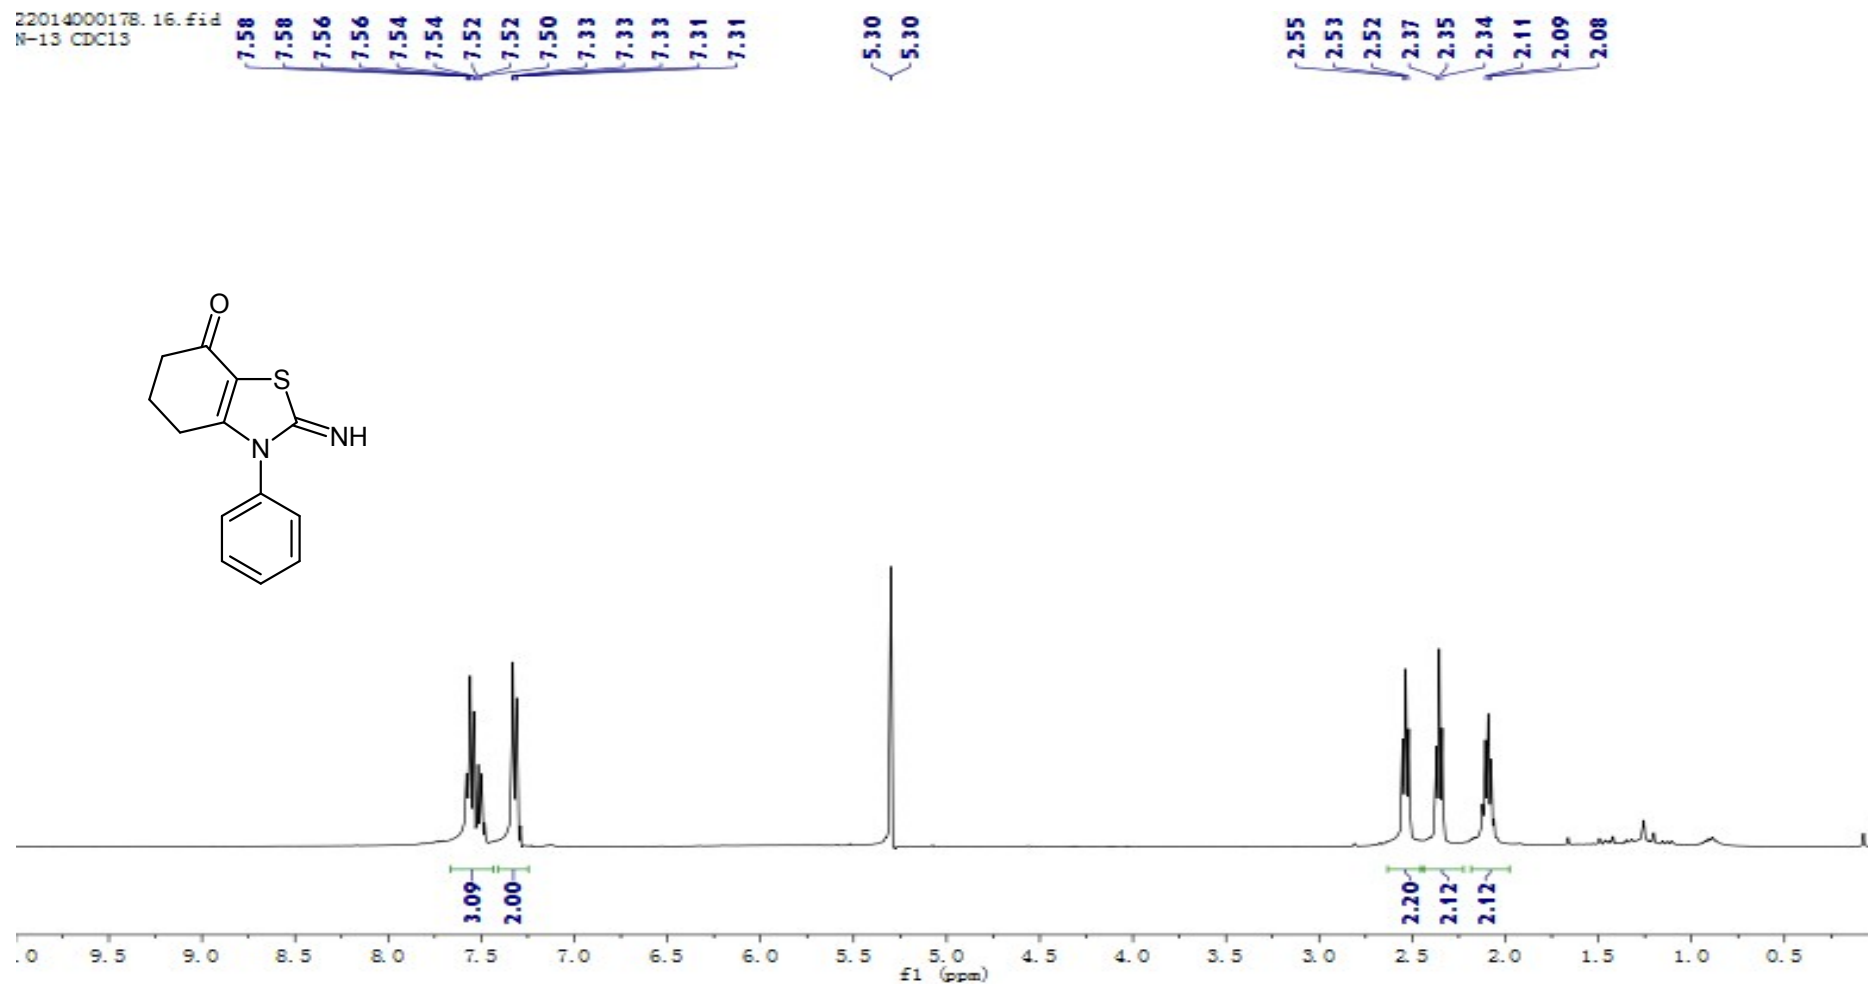

Figure 15.  $^1\text{H}$  NMR (400 MHz,  $\text{CDCl}_3$ ) spectra of compound 4h

22014000178.18.fid  
N-13 CDCl3

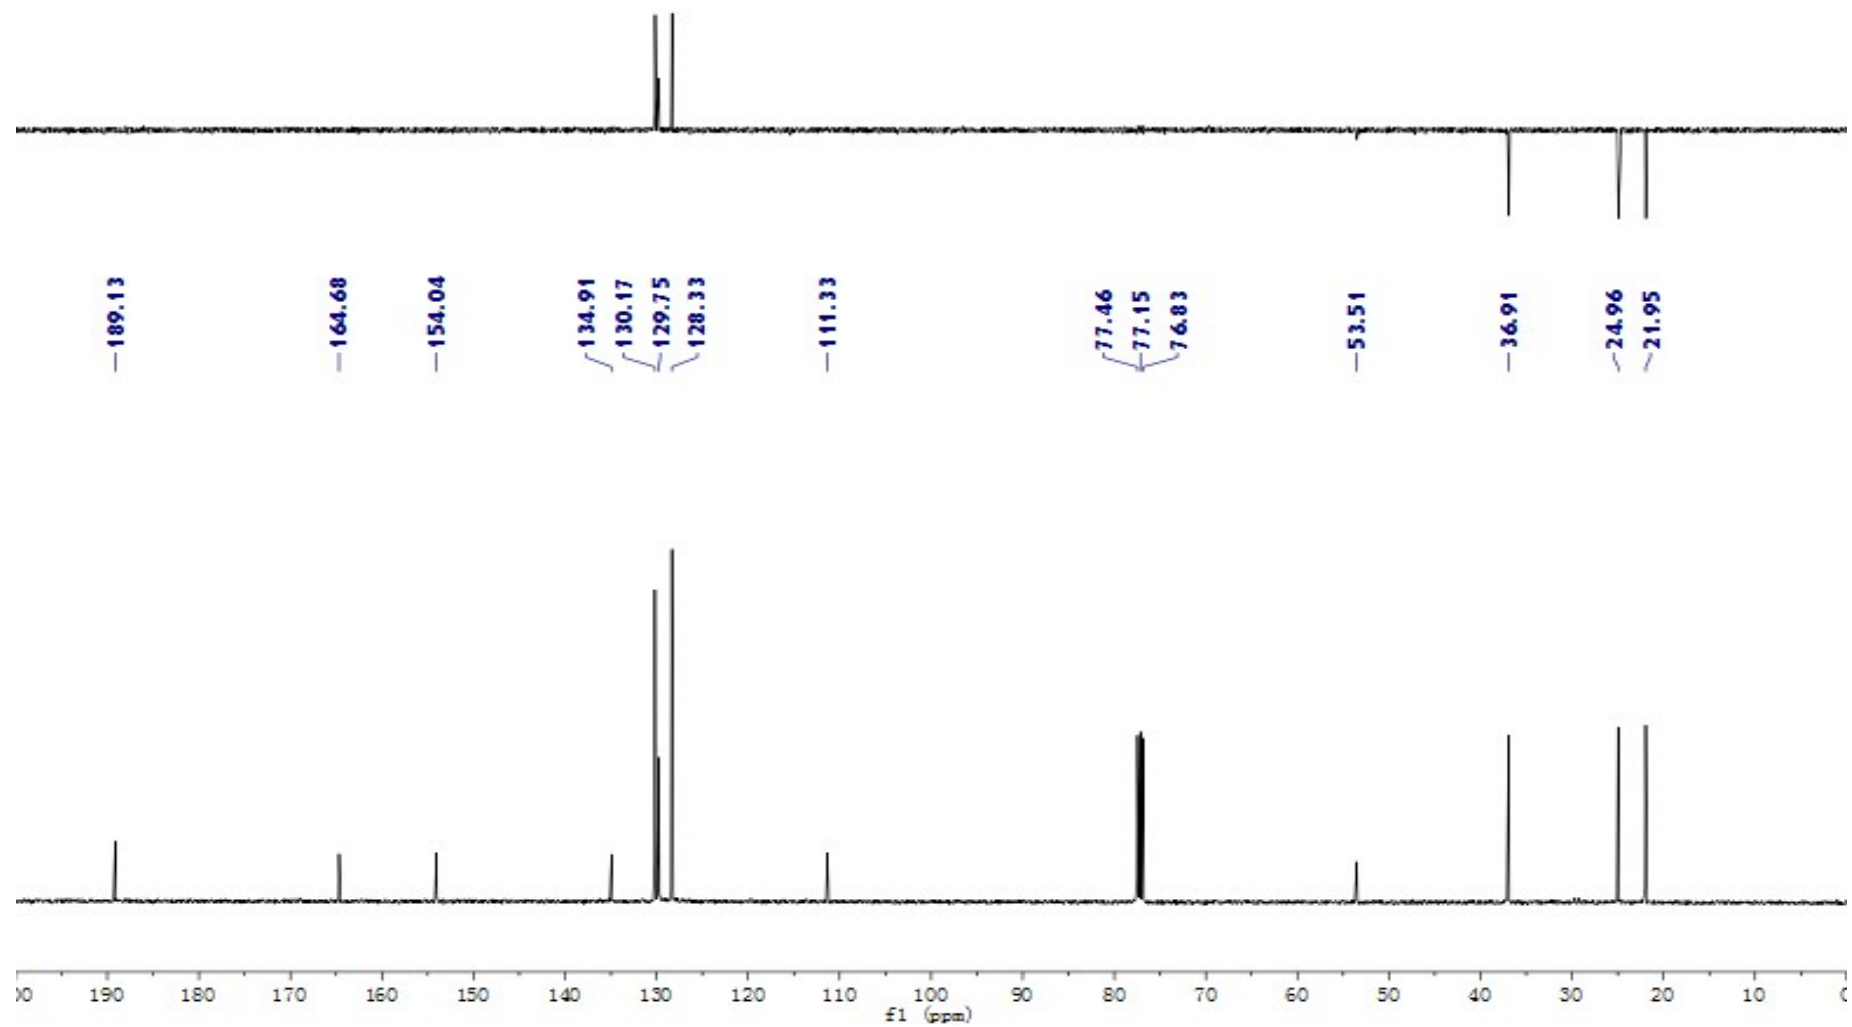

Figure 16.  $^{13}\text{C}$  NMR (100 MHz,  $\text{CDCl}_3$ ) spectra of compound **4h**

N-18.10.fid

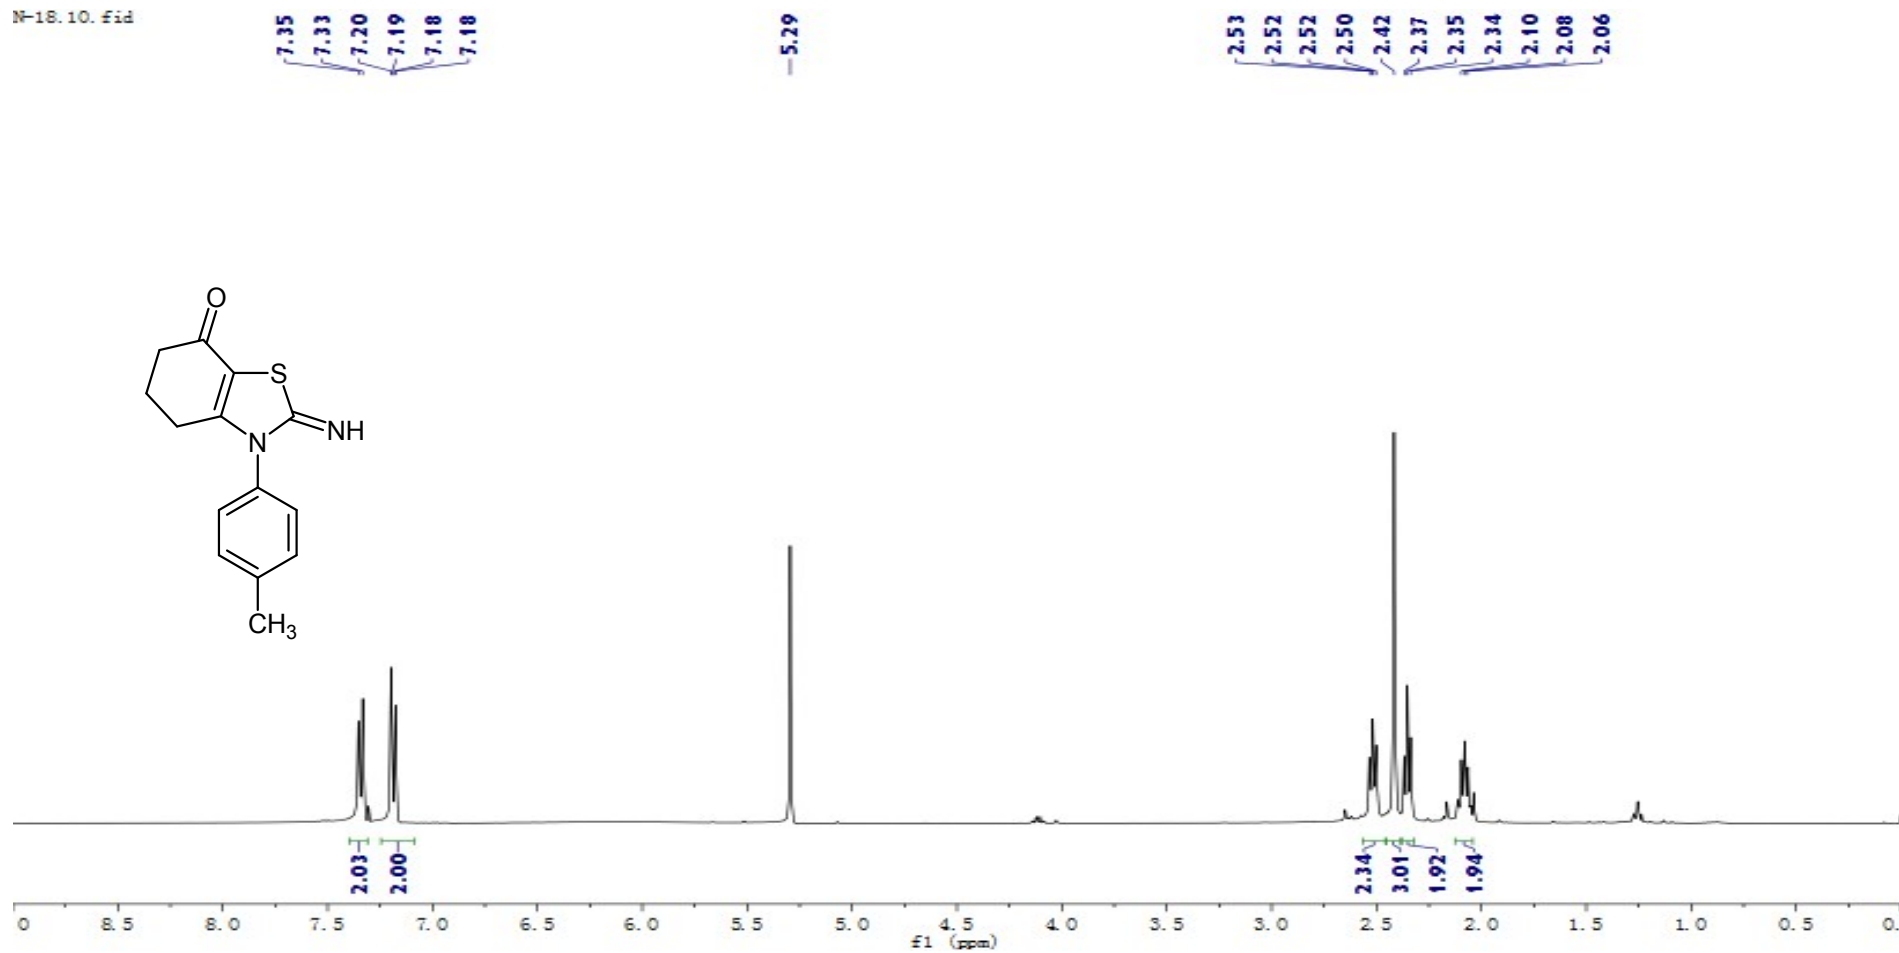

Figure 14.  $^1\text{H}$  NMR (400 MHz,  $\text{CDCl}_3$ ) spectra of compound 4i



N-18.12.fid

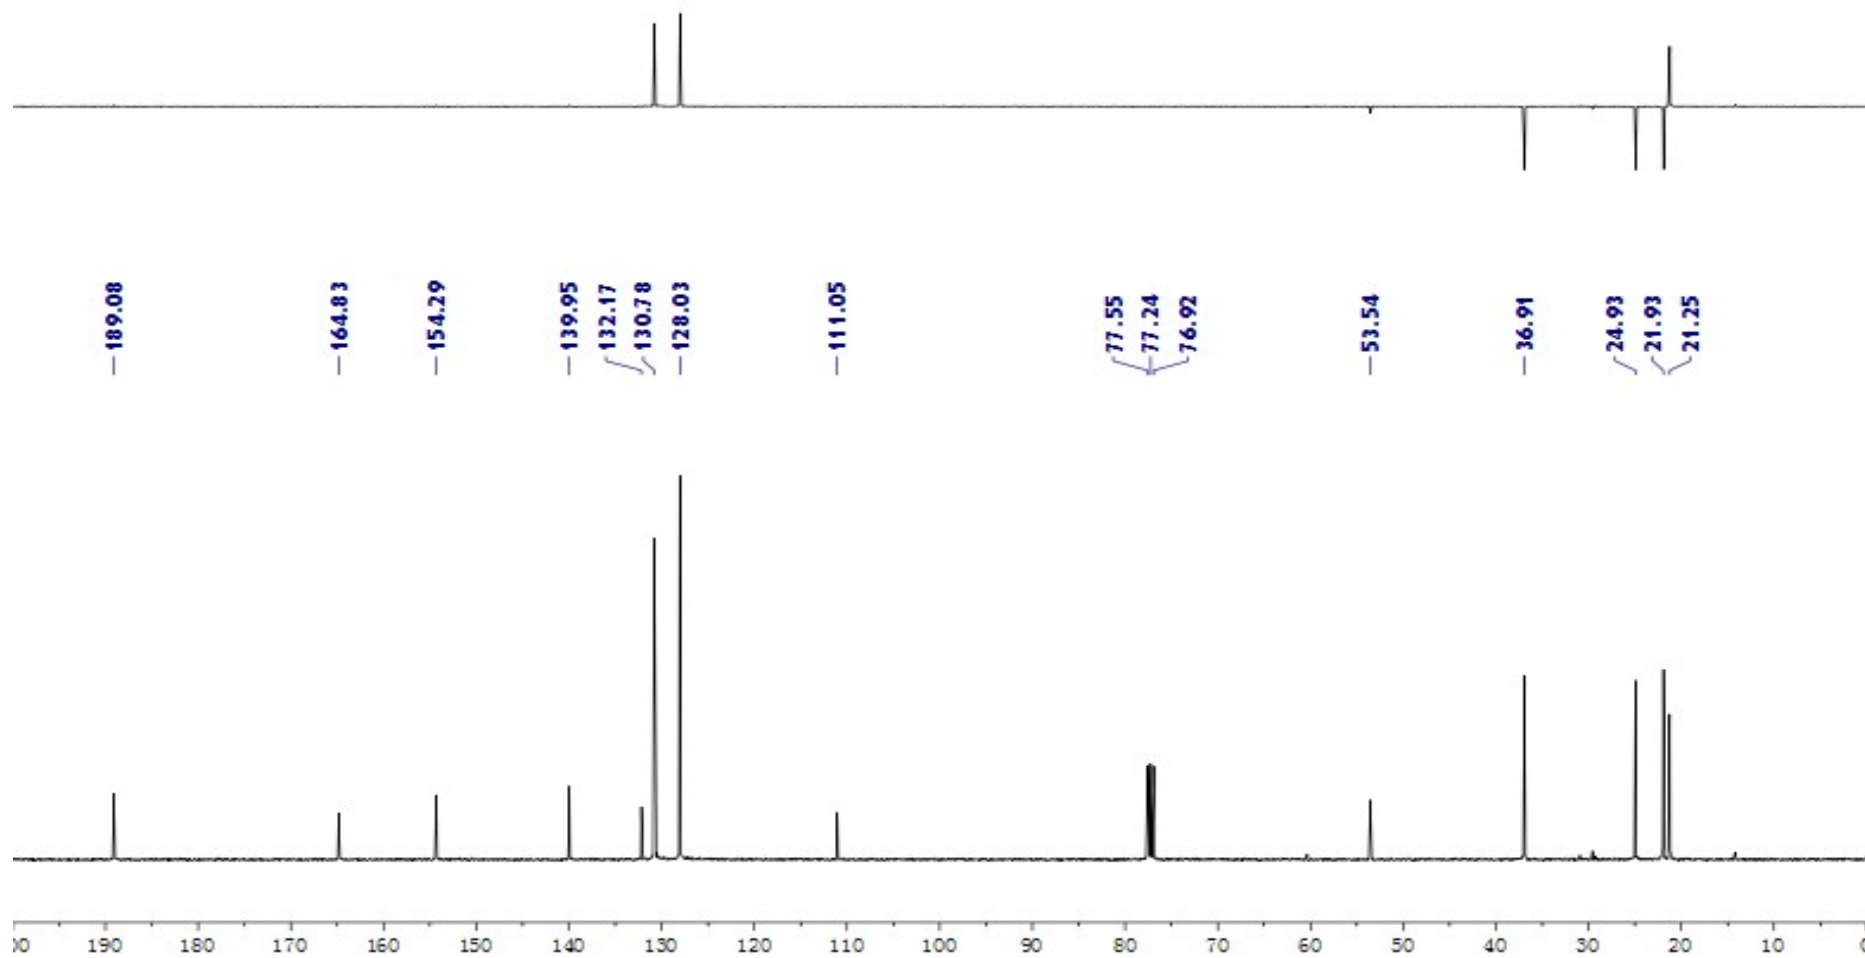

**Figure 18.**  $^{13}\text{C}$  NMR (100 MHz,  $\text{CDCl}_3$ ) spectra of compound 4i

22014000178.10.fid  
N-7 CDCl3

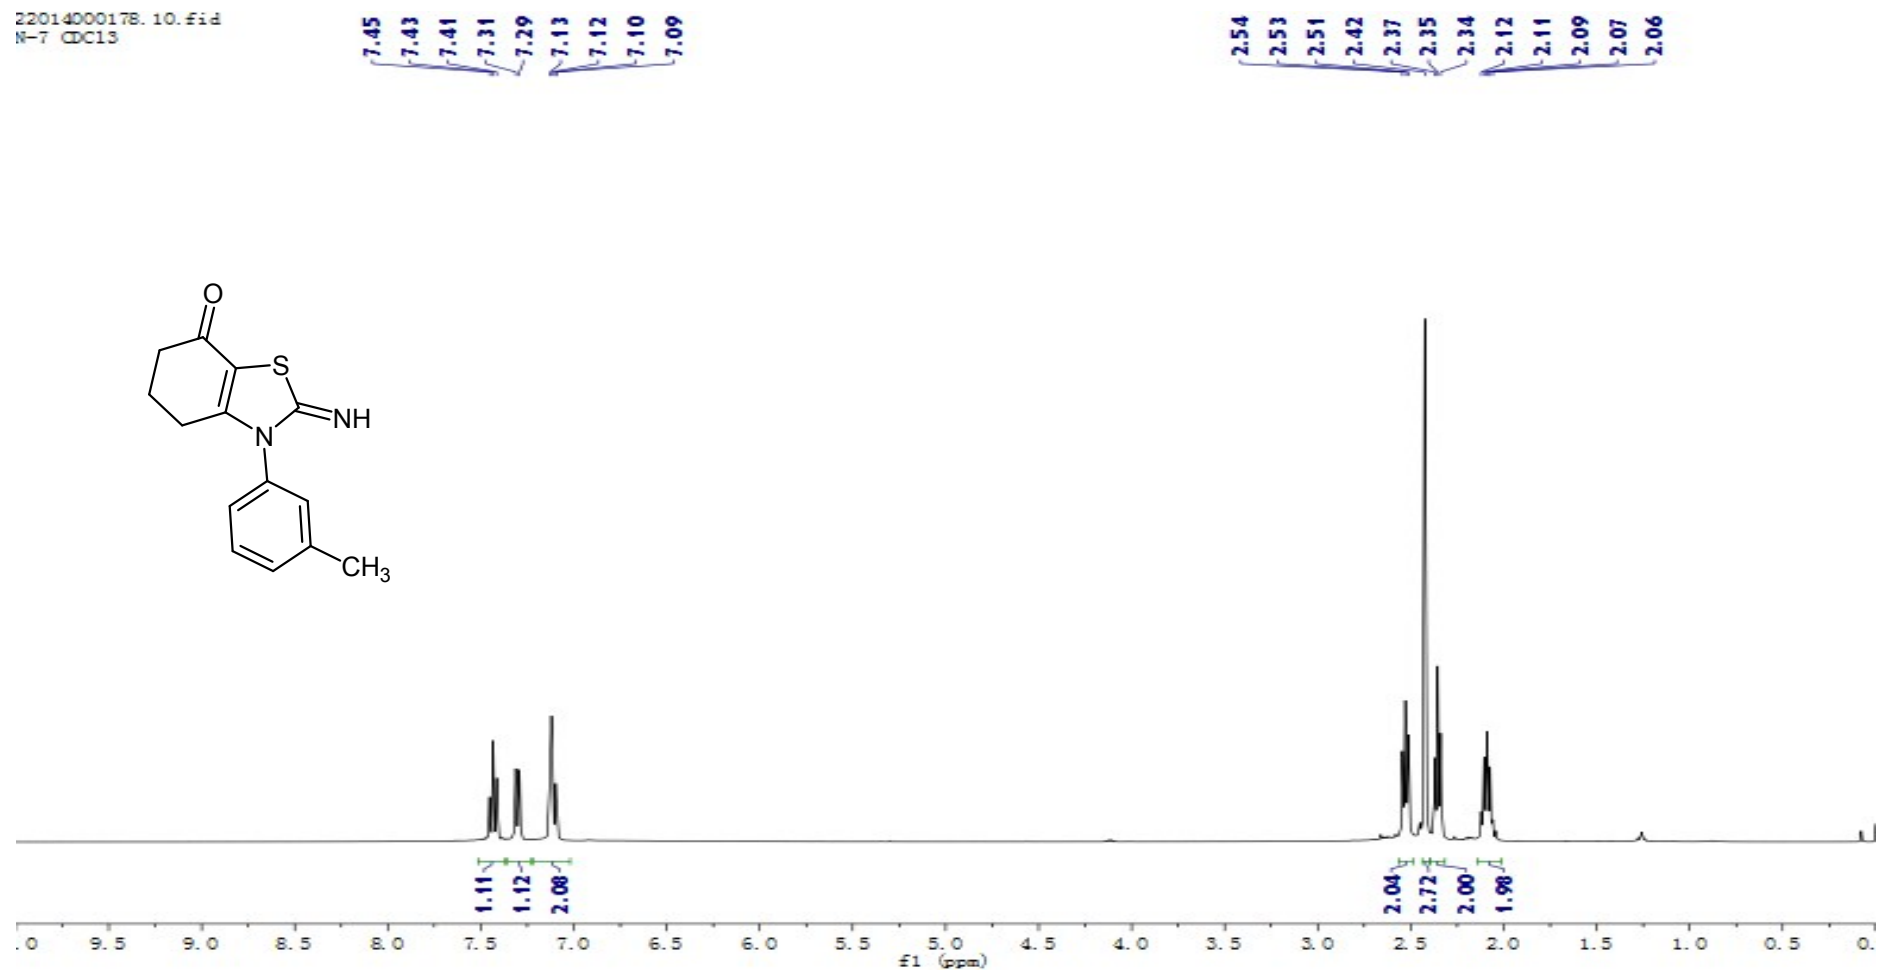

Figure 19. <sup>1</sup>H NMR (400 MHz, CDCl<sub>3</sub>) spectra of compound 4j

22014000178.12.fid  
N-7 CDCl<sub>3</sub>

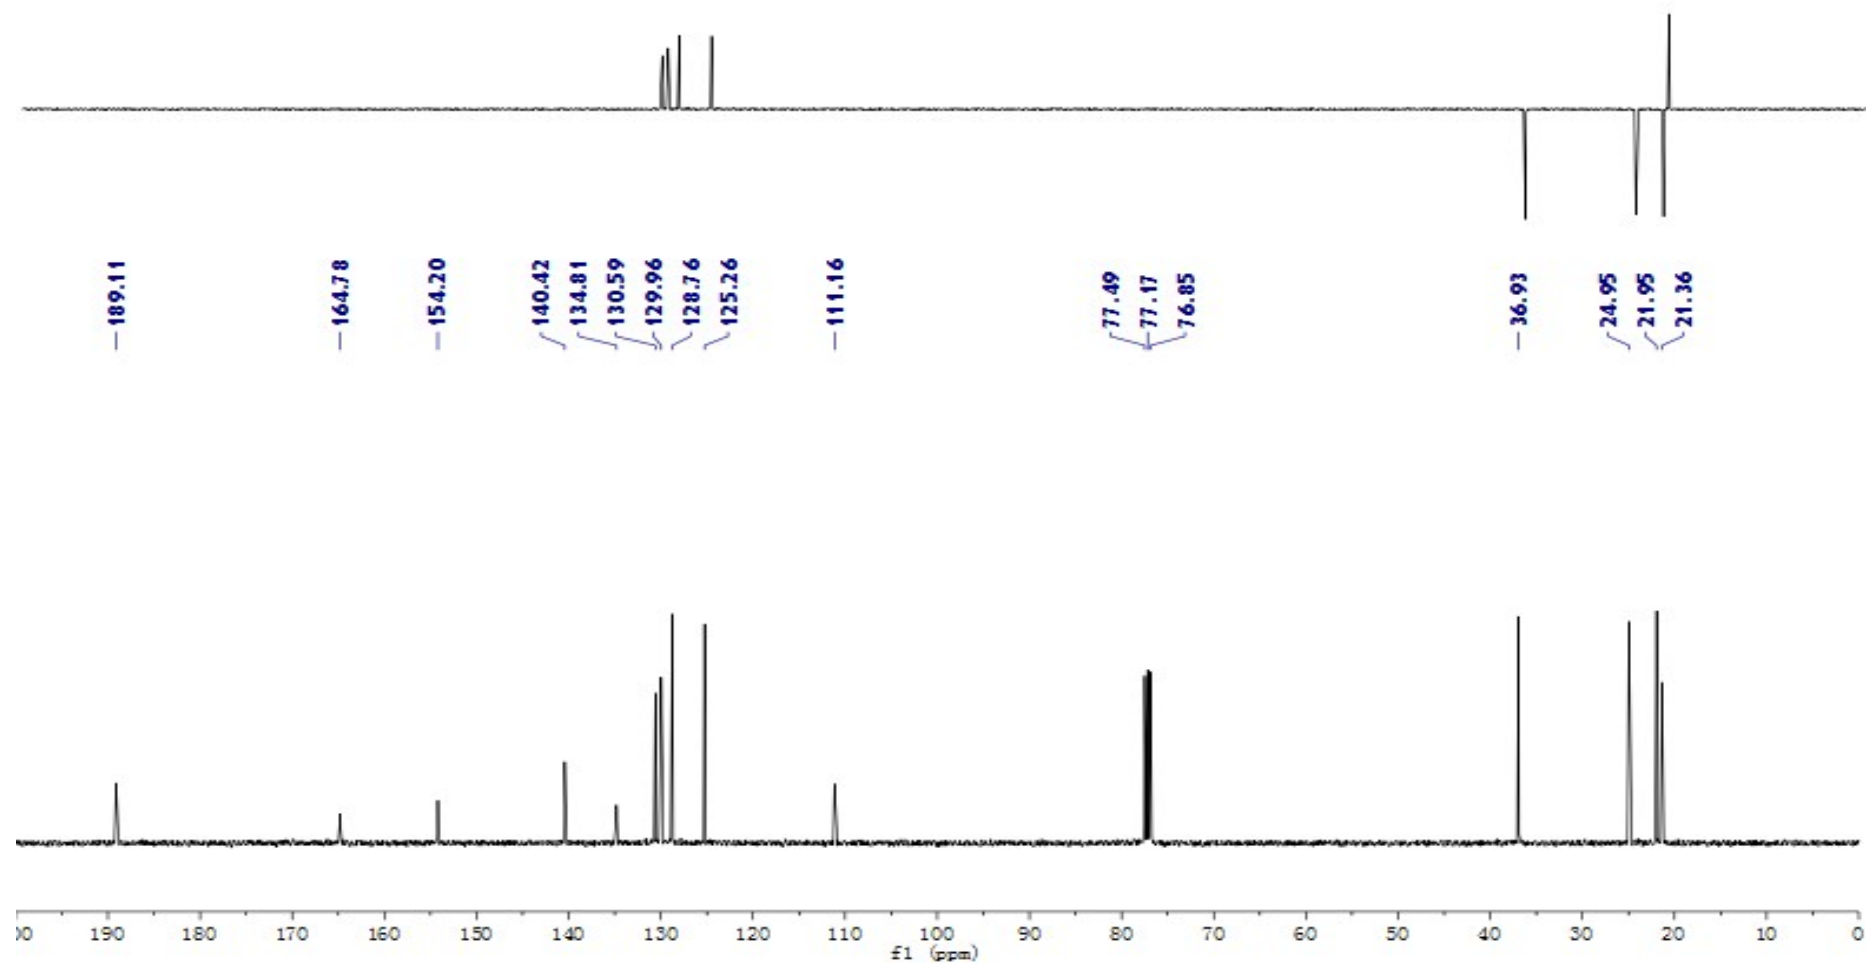

Figure 20. <sup>13</sup>C NMR (100 MHz, CDCl<sub>3</sub>) spectra of compound 4j

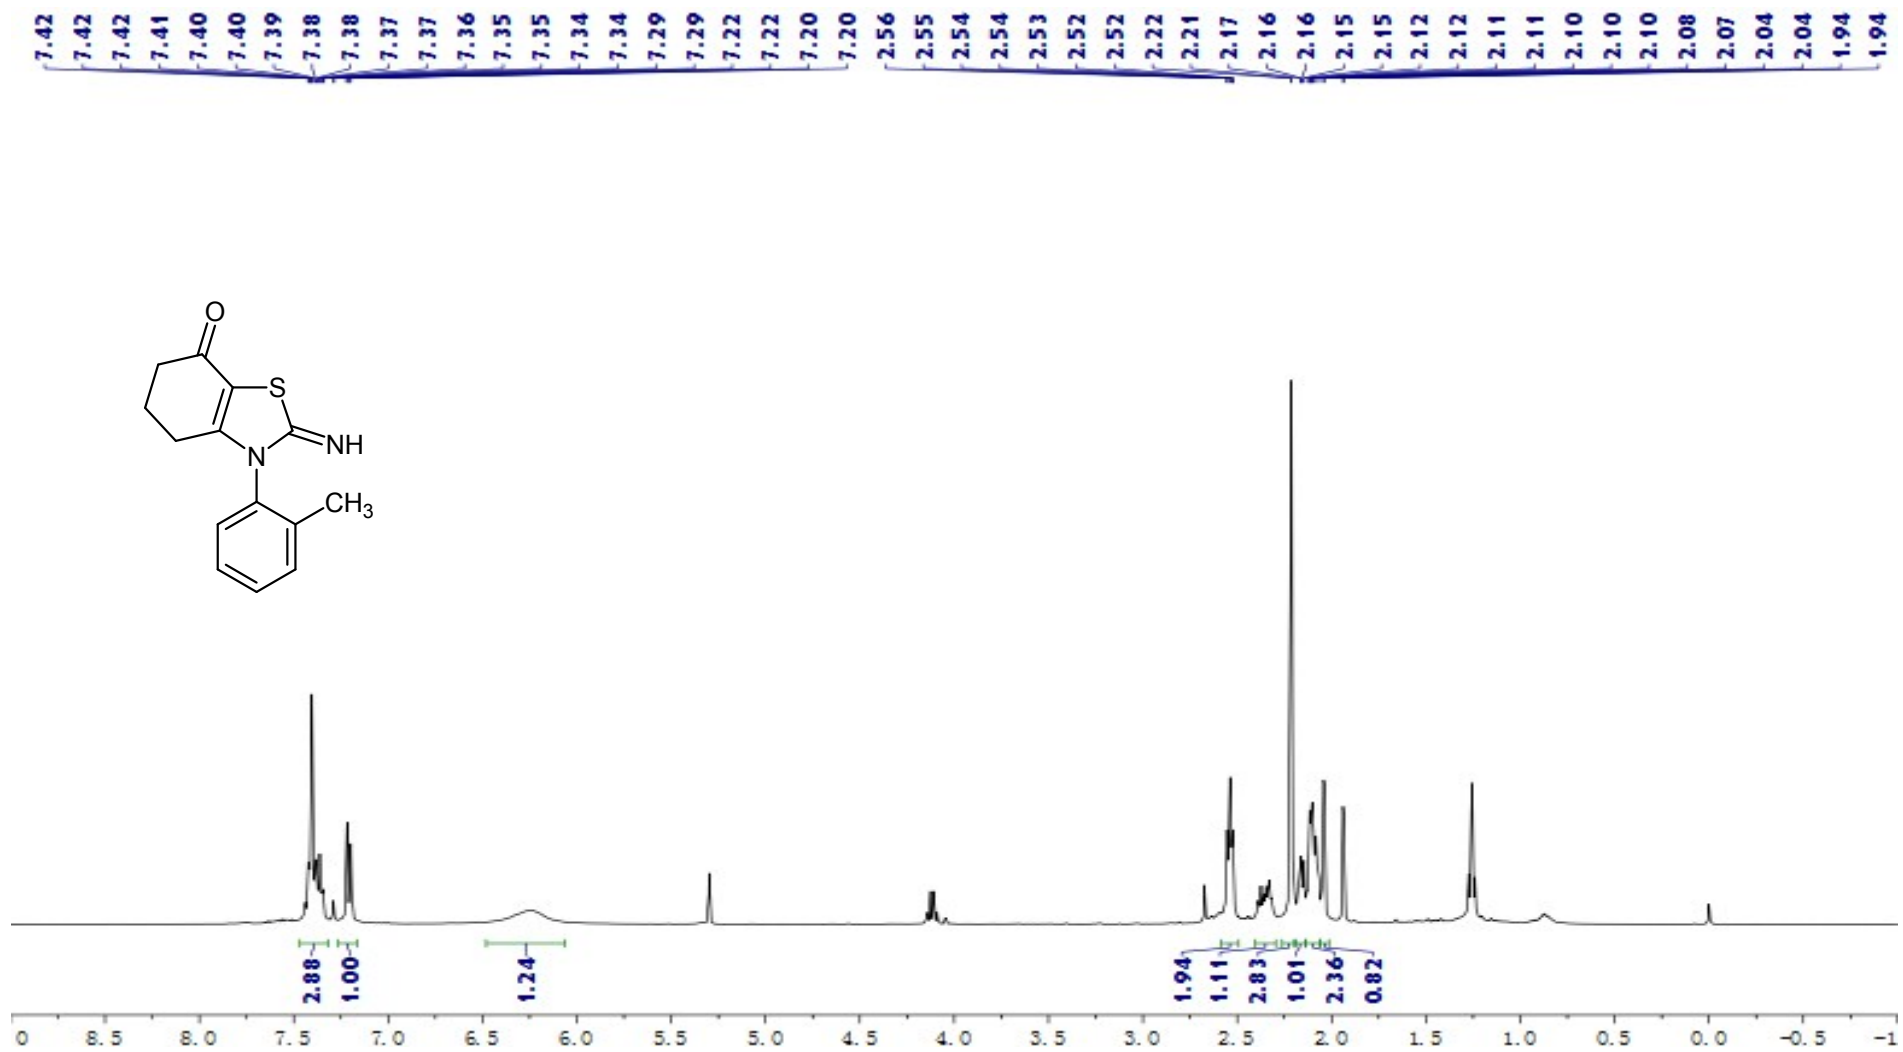

Figure 21. <sup>1</sup>H NMR (400 MHz, CDCl<sub>3</sub>) spectra of compound 4k

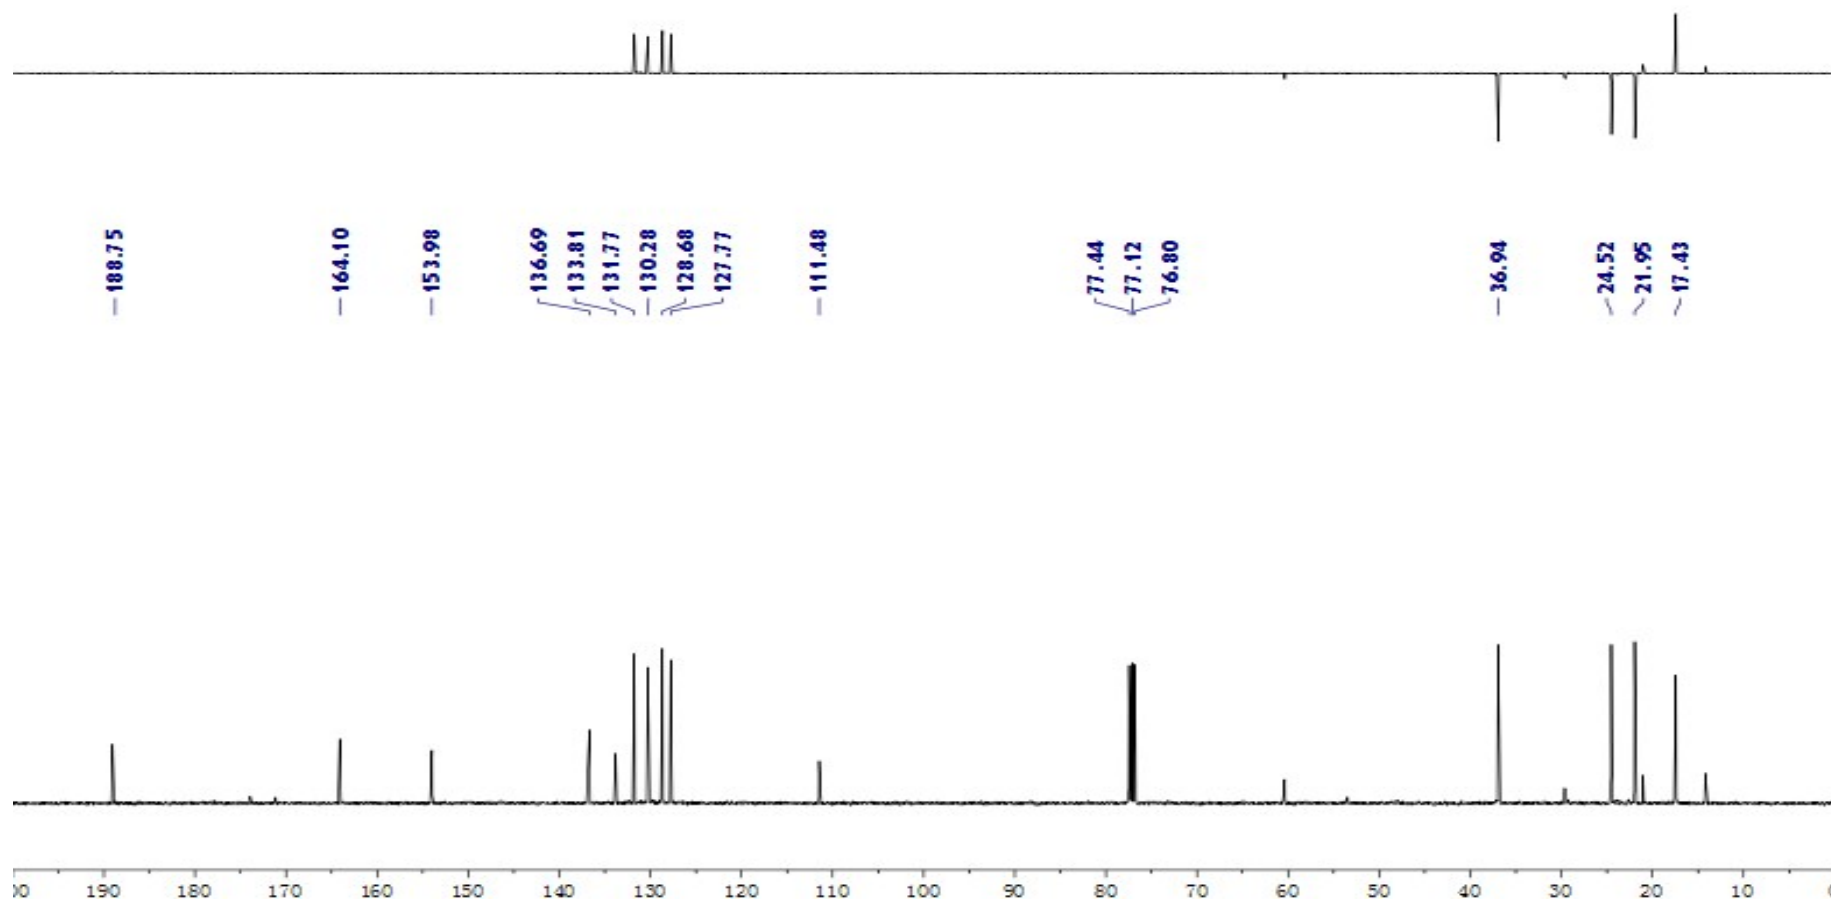

**Figure 22.** <sup>13</sup>C NMR (100 MHz, CDCl<sub>3</sub>) spectra of compound **4k**

20160620 N1-1 DMSO

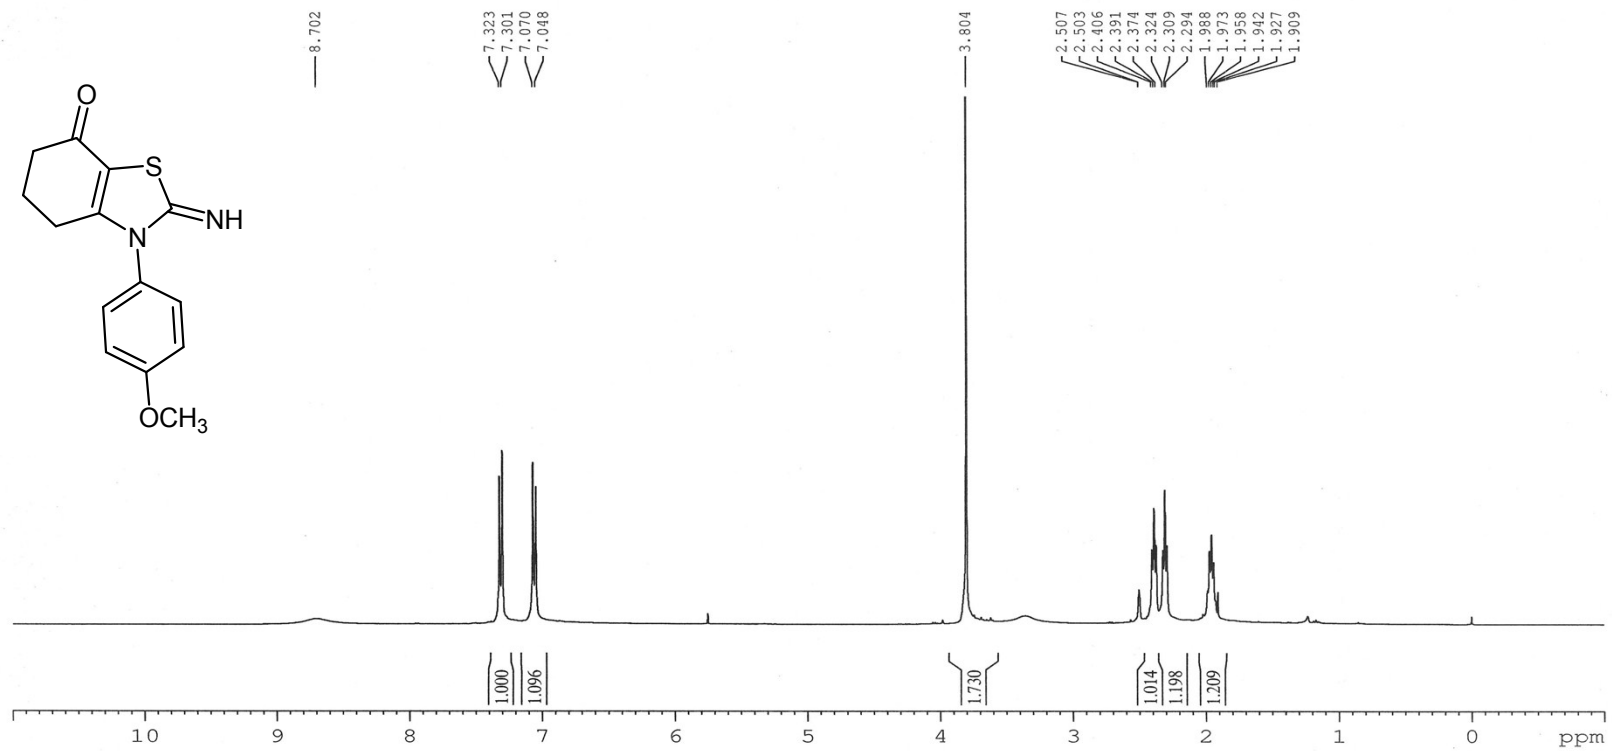

**Figure 23.** <sup>1</sup>H NMR (400 MHz, DMSO-*d*<sub>6</sub>) spectra of compound **4I**

20160620 N1-1 DMSO

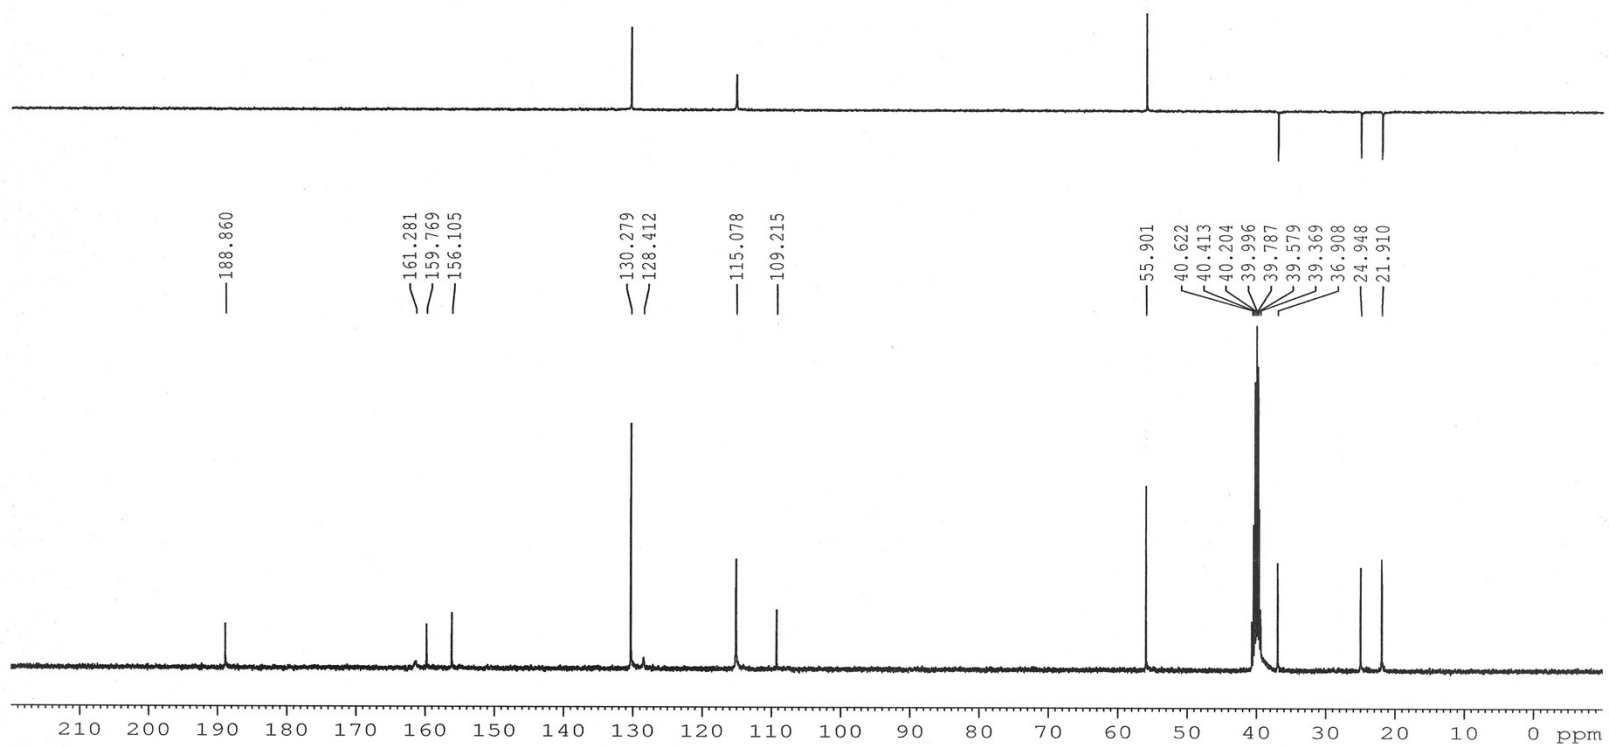

**Figure 24.**  $^{13}\text{C}$  NMR (100 MHz,  $\text{DMSO-}d_6$ ) spectra of compound 41





N-24.12.fid

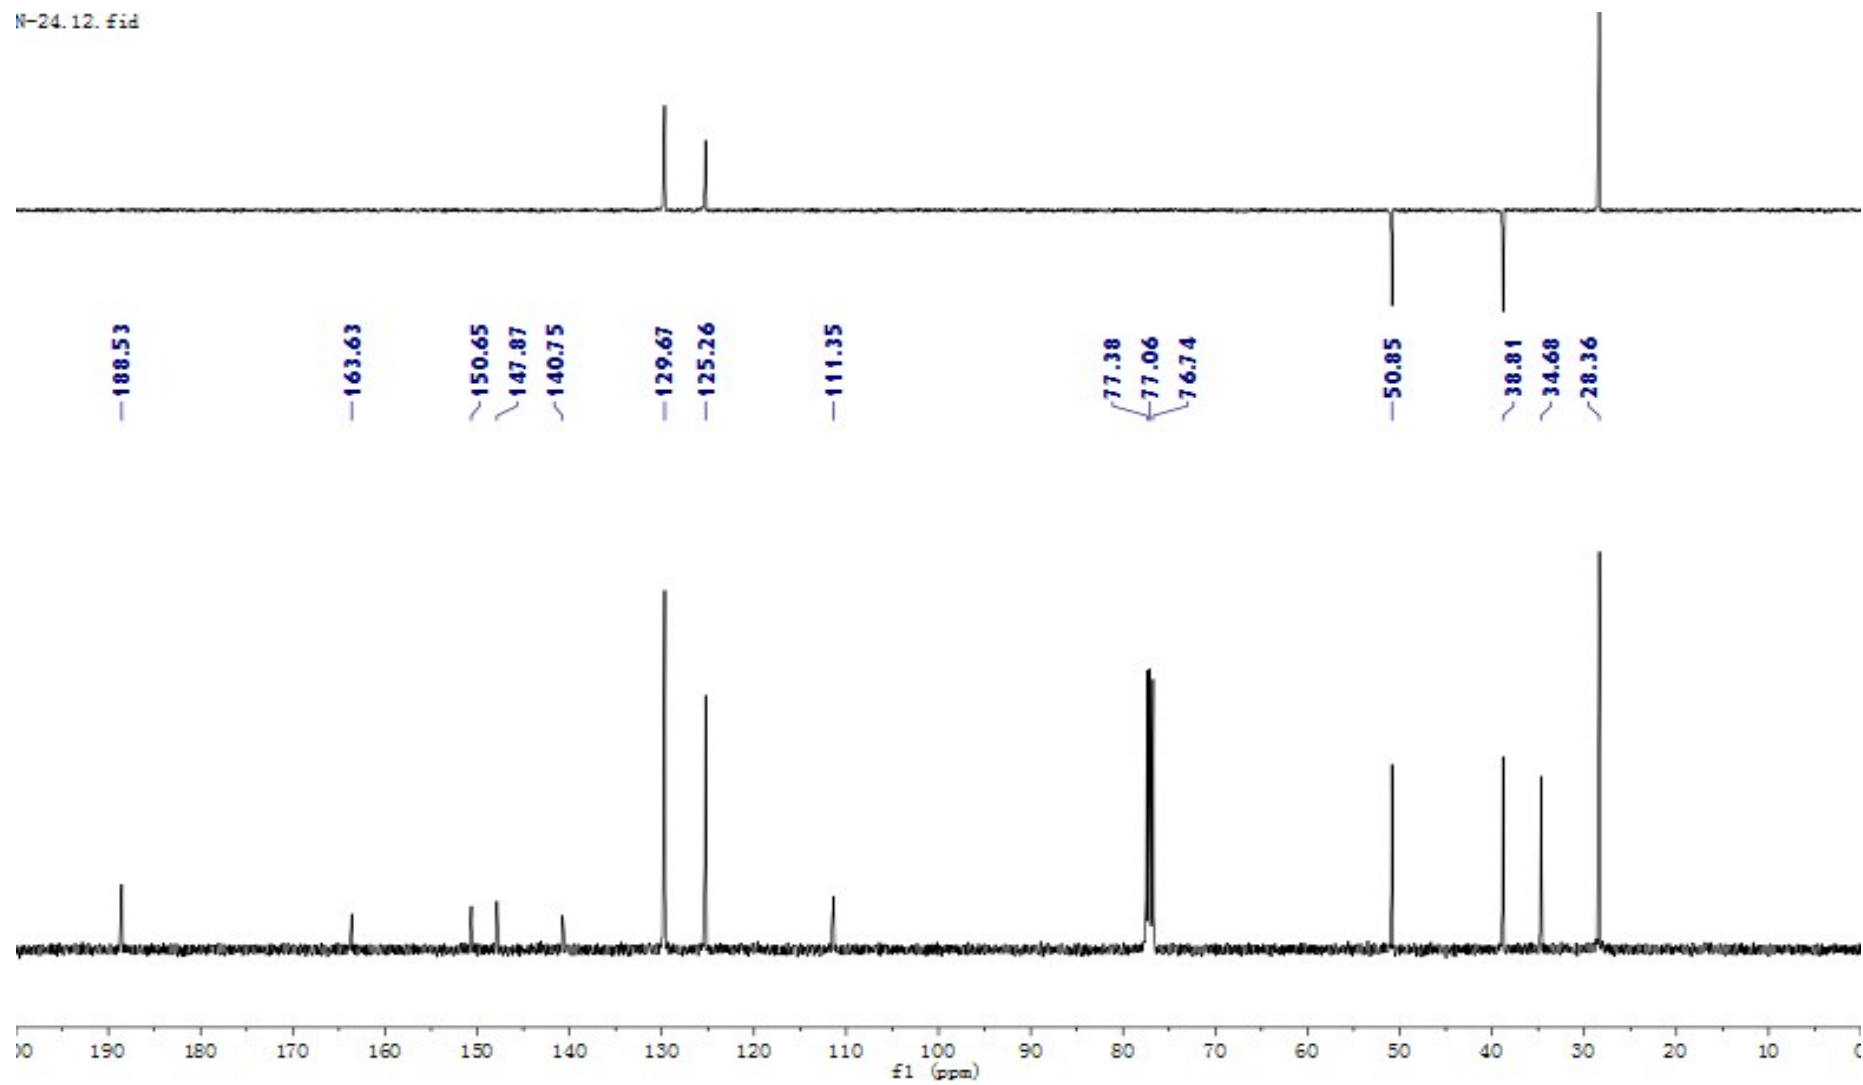

Figure 26.  $^{13}\text{C}$  NMR (100 MHz,  $\text{CDCl}_3$ ) spectra of compound 4m

22014000178\_4  
N-4 CDCl3

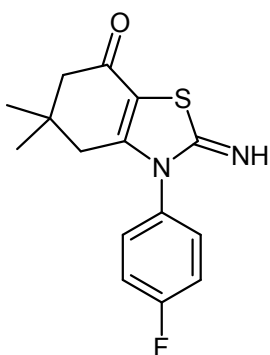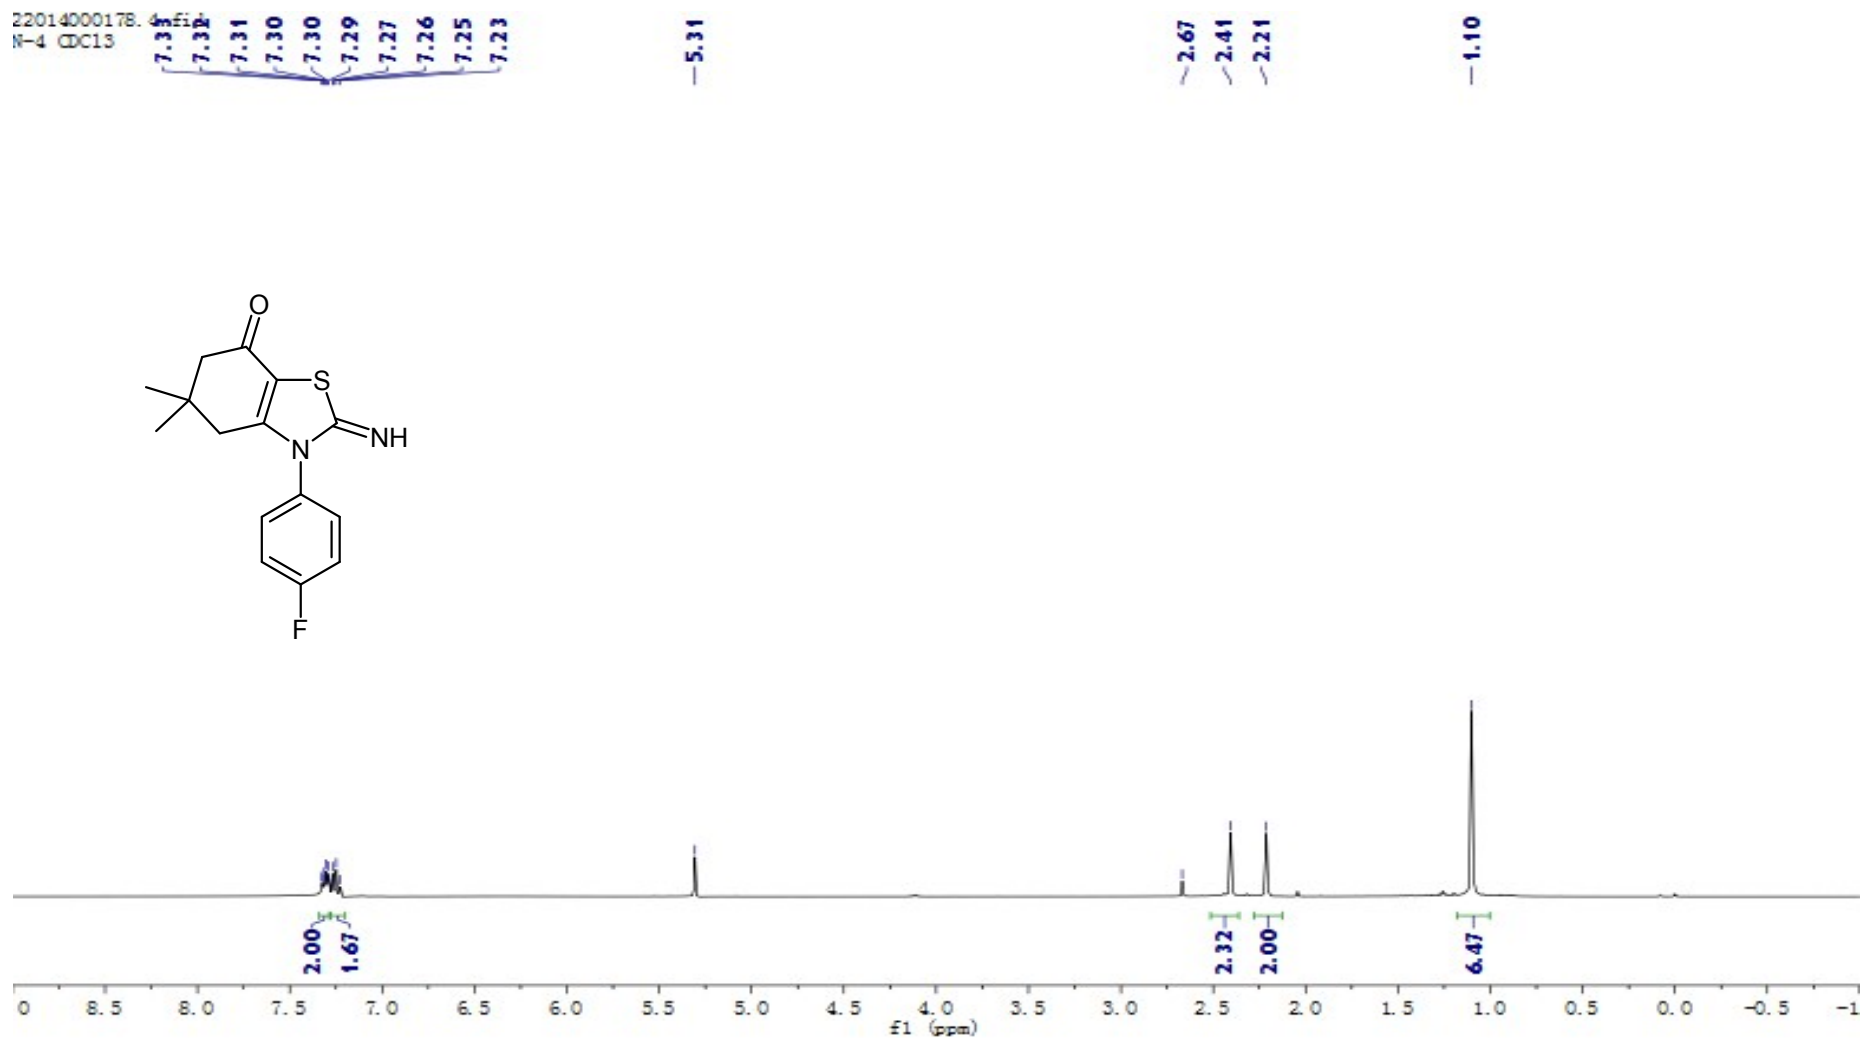

Figure 27.  $^1\text{H}$  NMR (400 MHz,  $\text{CDCl}_3$ ) spectra of compound **4n**

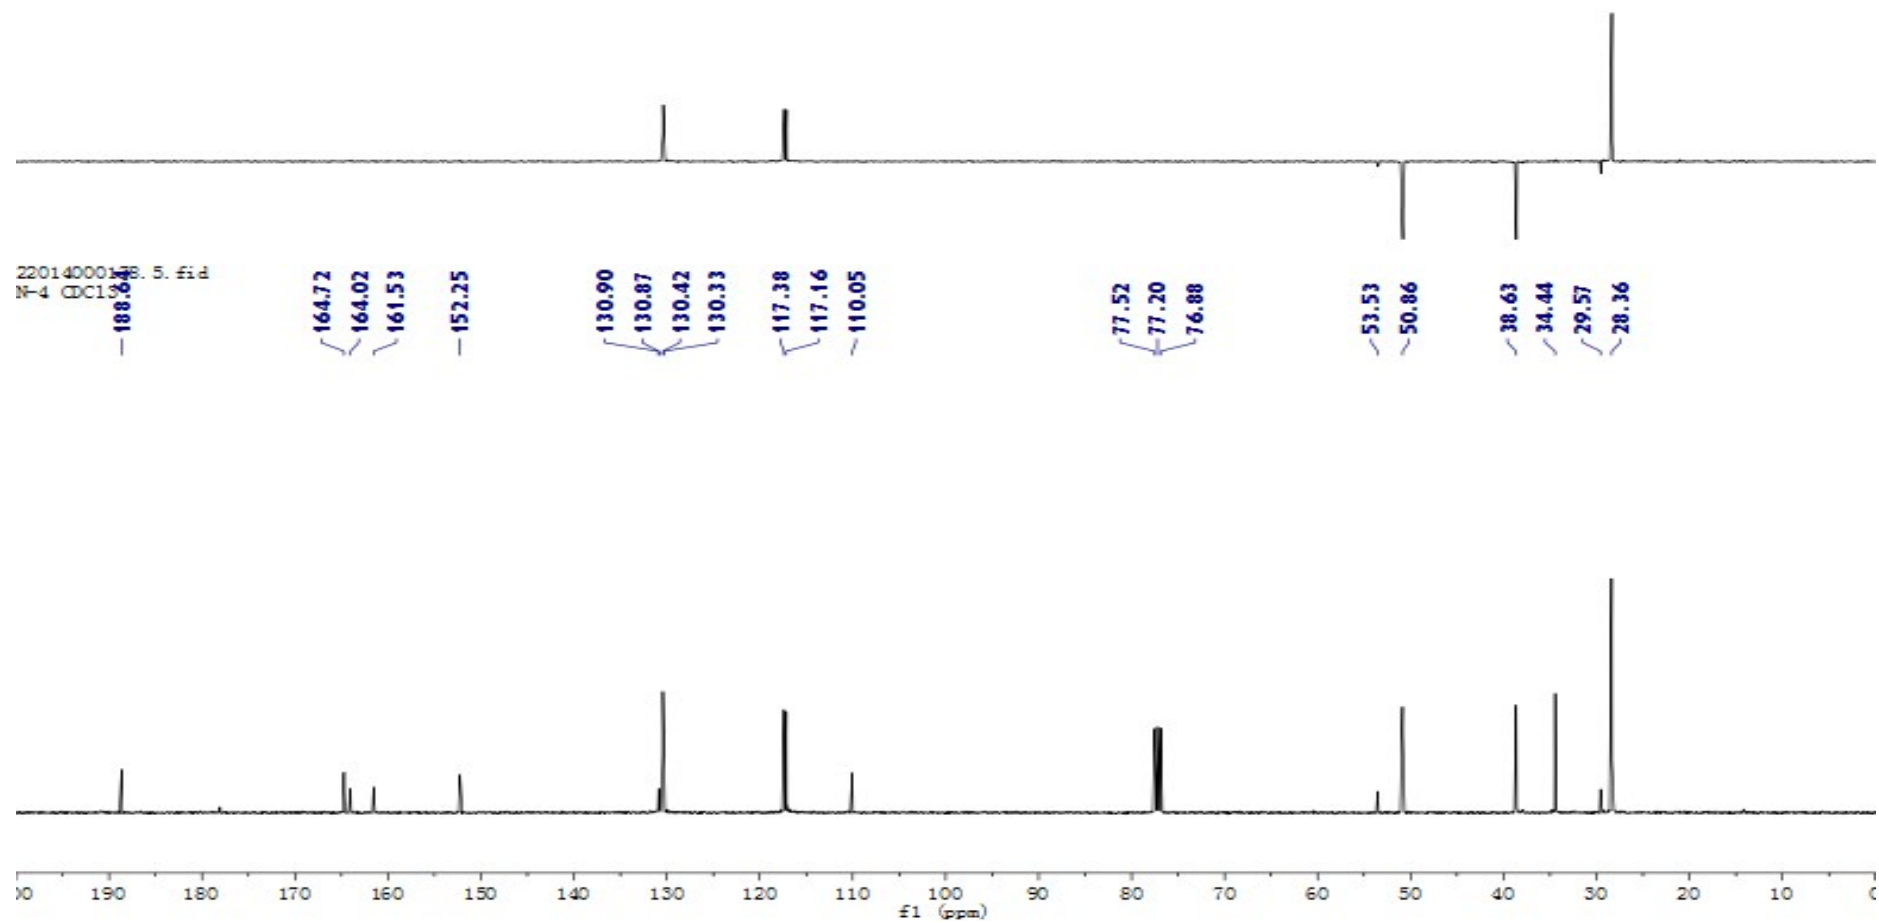

**Figure 28.** <sup>13</sup>C NMR (100 MHz, CDCl<sub>3</sub>) spectra of compound **4n**

N-10-1.10.fid

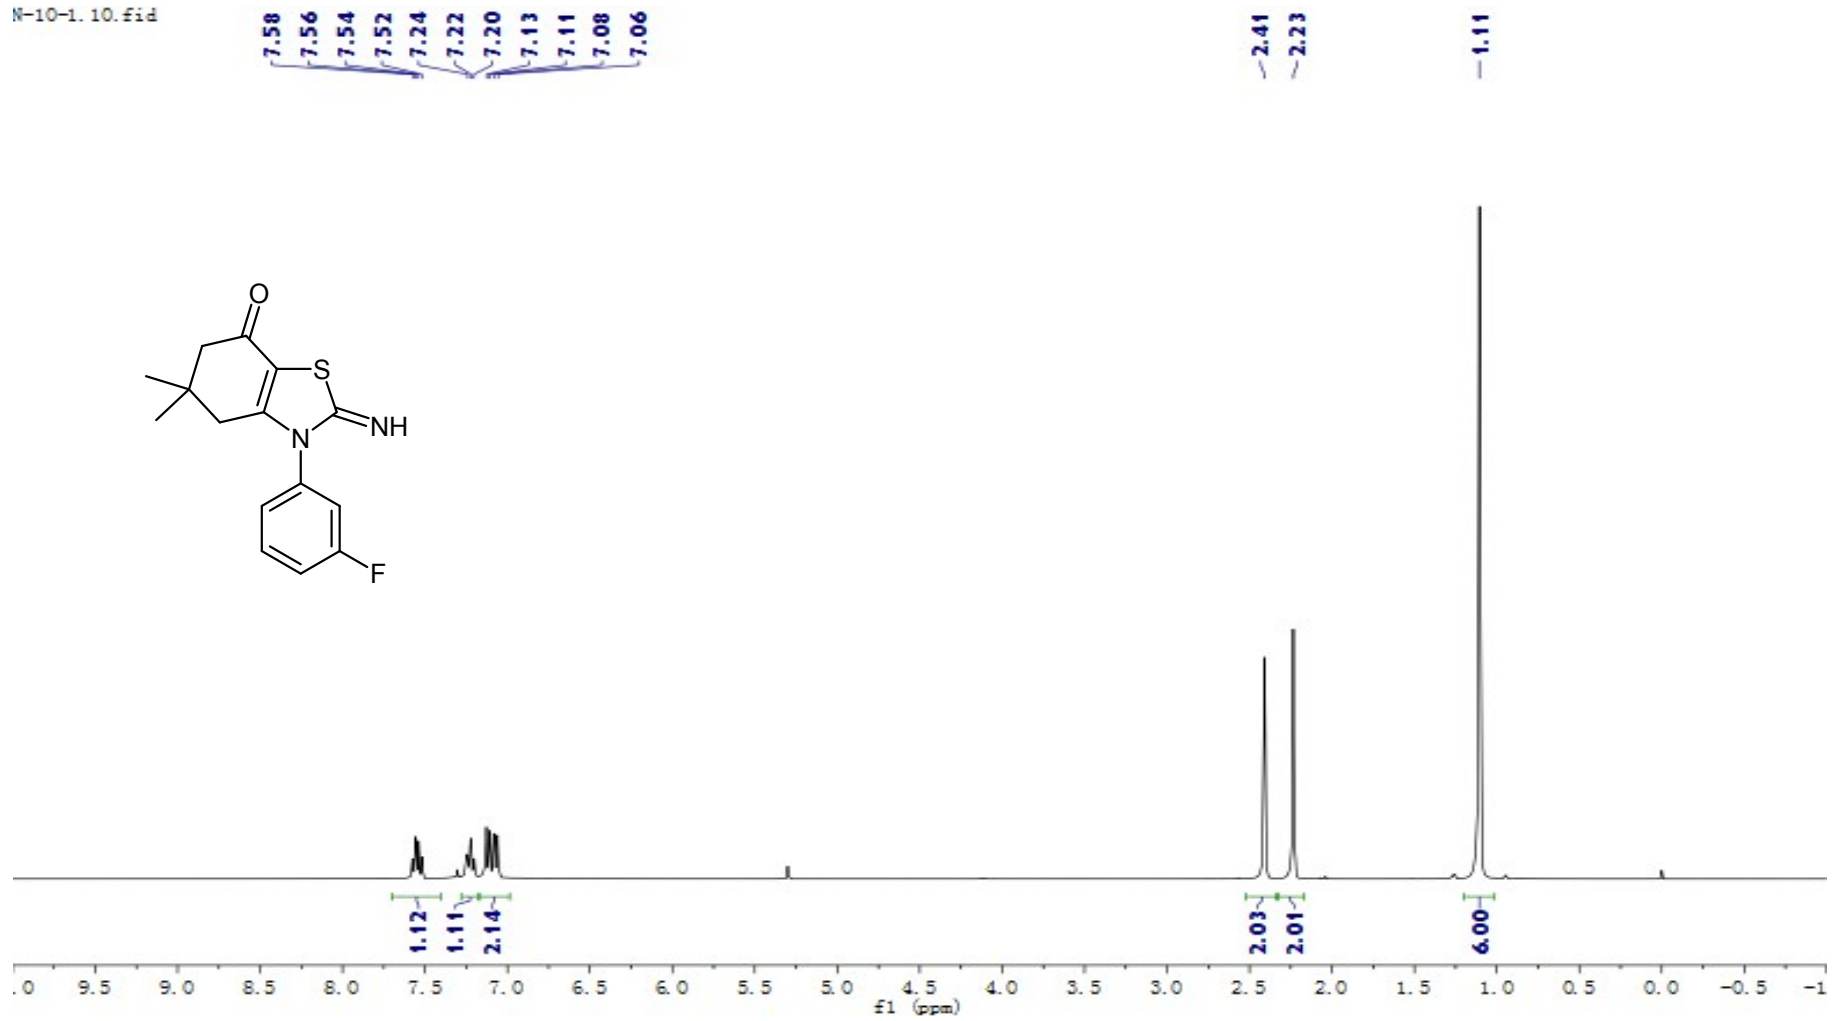

Figure 29.  $^1\text{H}$  NMR (400 MHz,  $\text{CDCl}_3$ ) spectra of compound 4o

N-10-1.12.fid

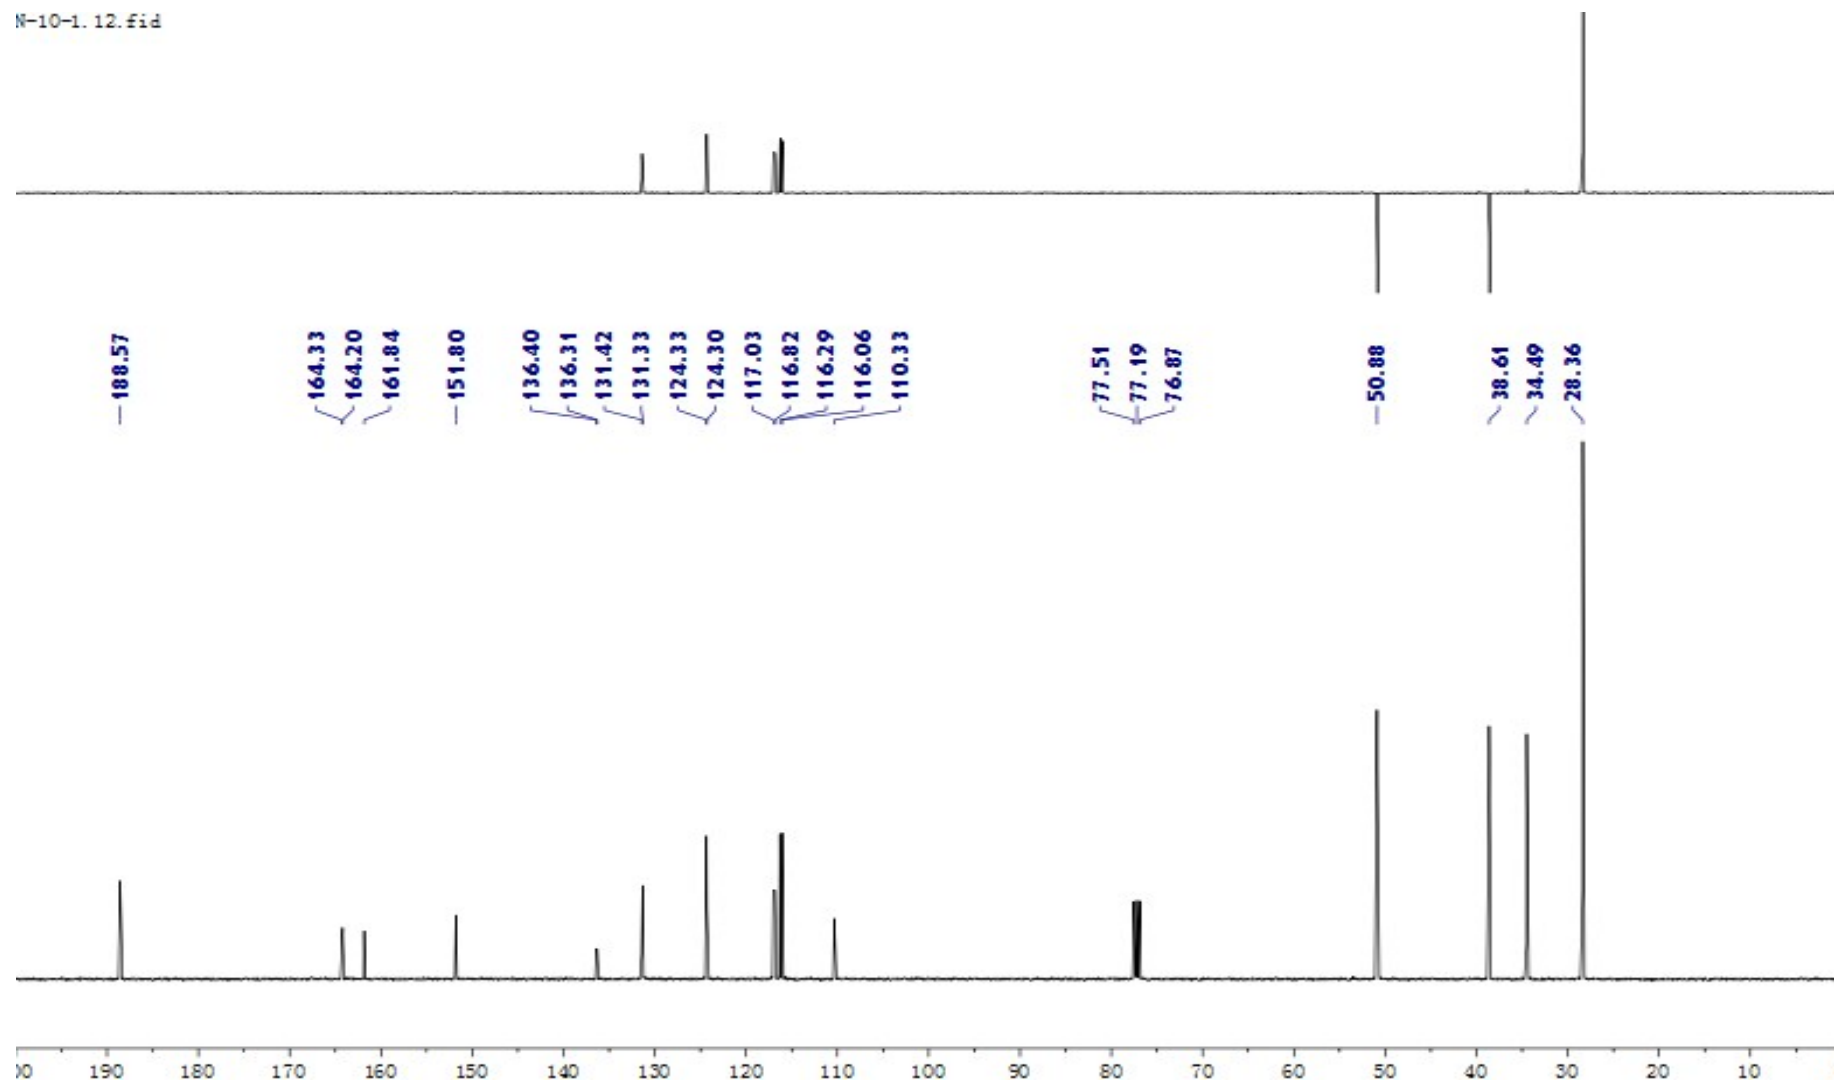

**Figure 30.**  $^{13}\text{C}$  NMR (100 MHz,  $\text{CDCl}_3$ ) spectra of compound **40**

22014000178. 7. fid  
N-5 CDCl3

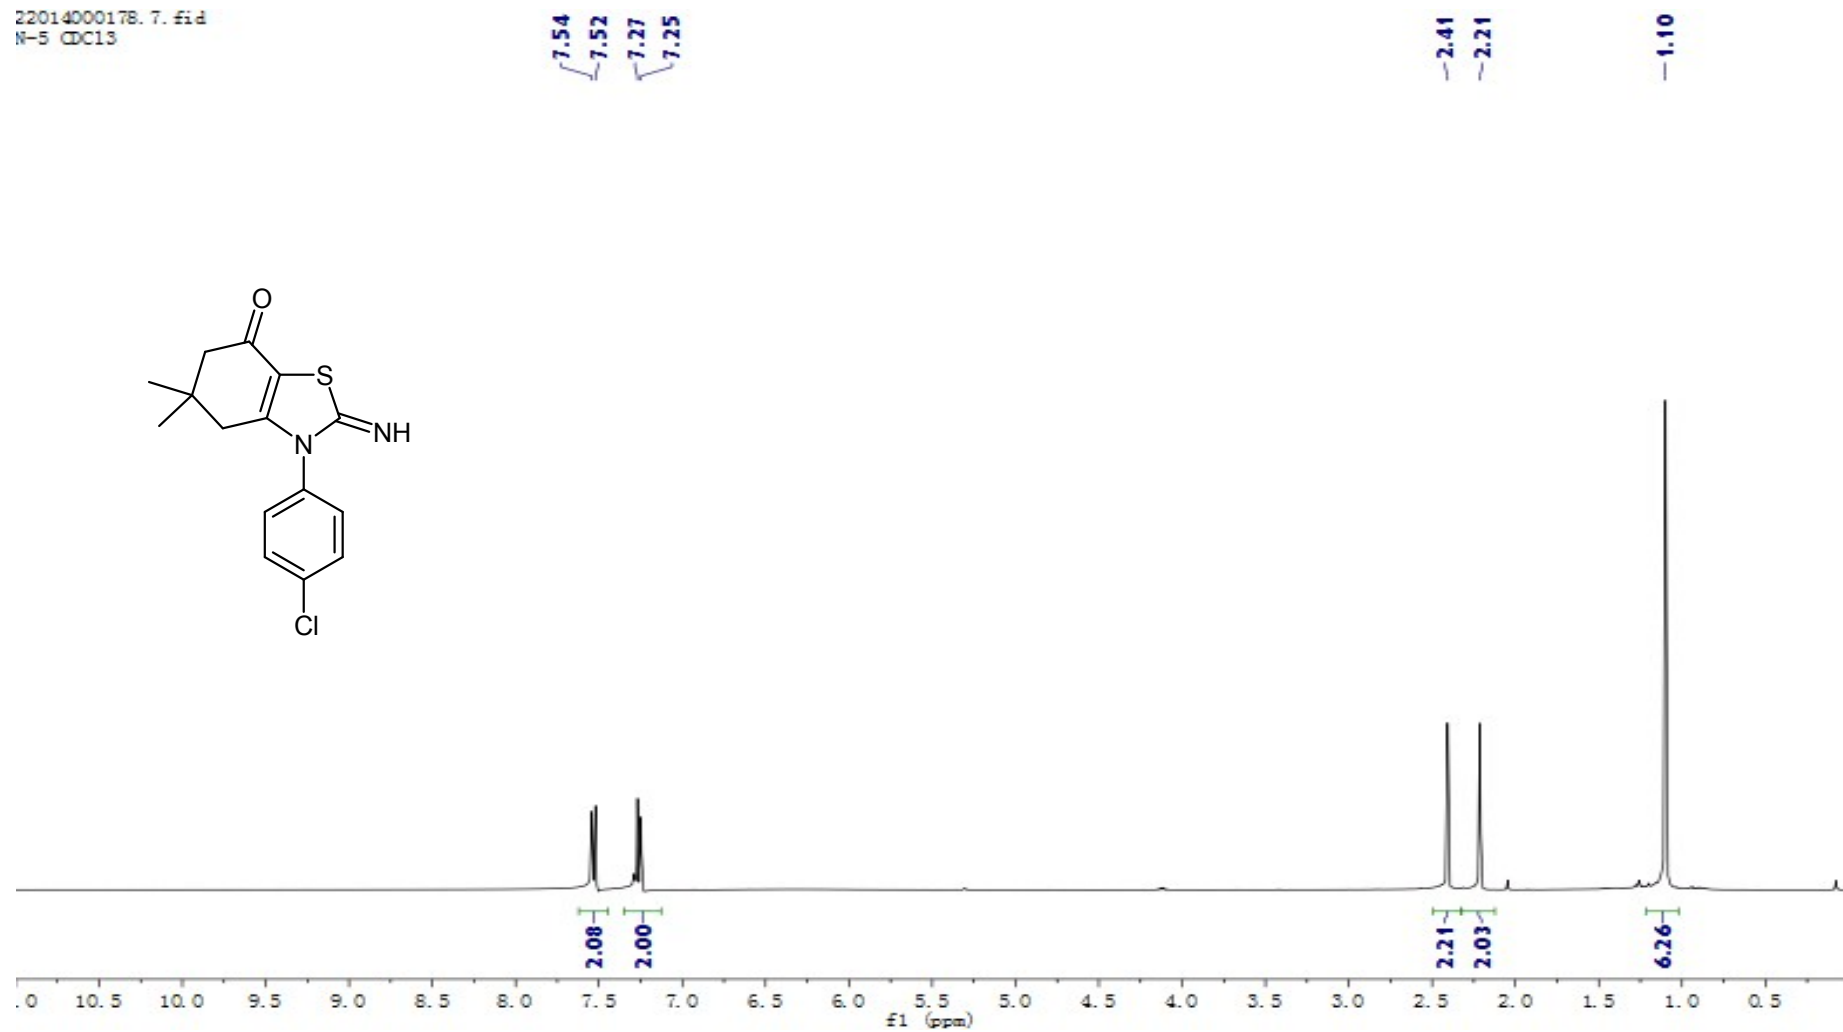

Figure 31. <sup>1</sup>H NMR (400 MHz, CDCl<sub>3</sub>) spectra of compound 4p

22014000178. 9. fid  
N-5 CDCl3

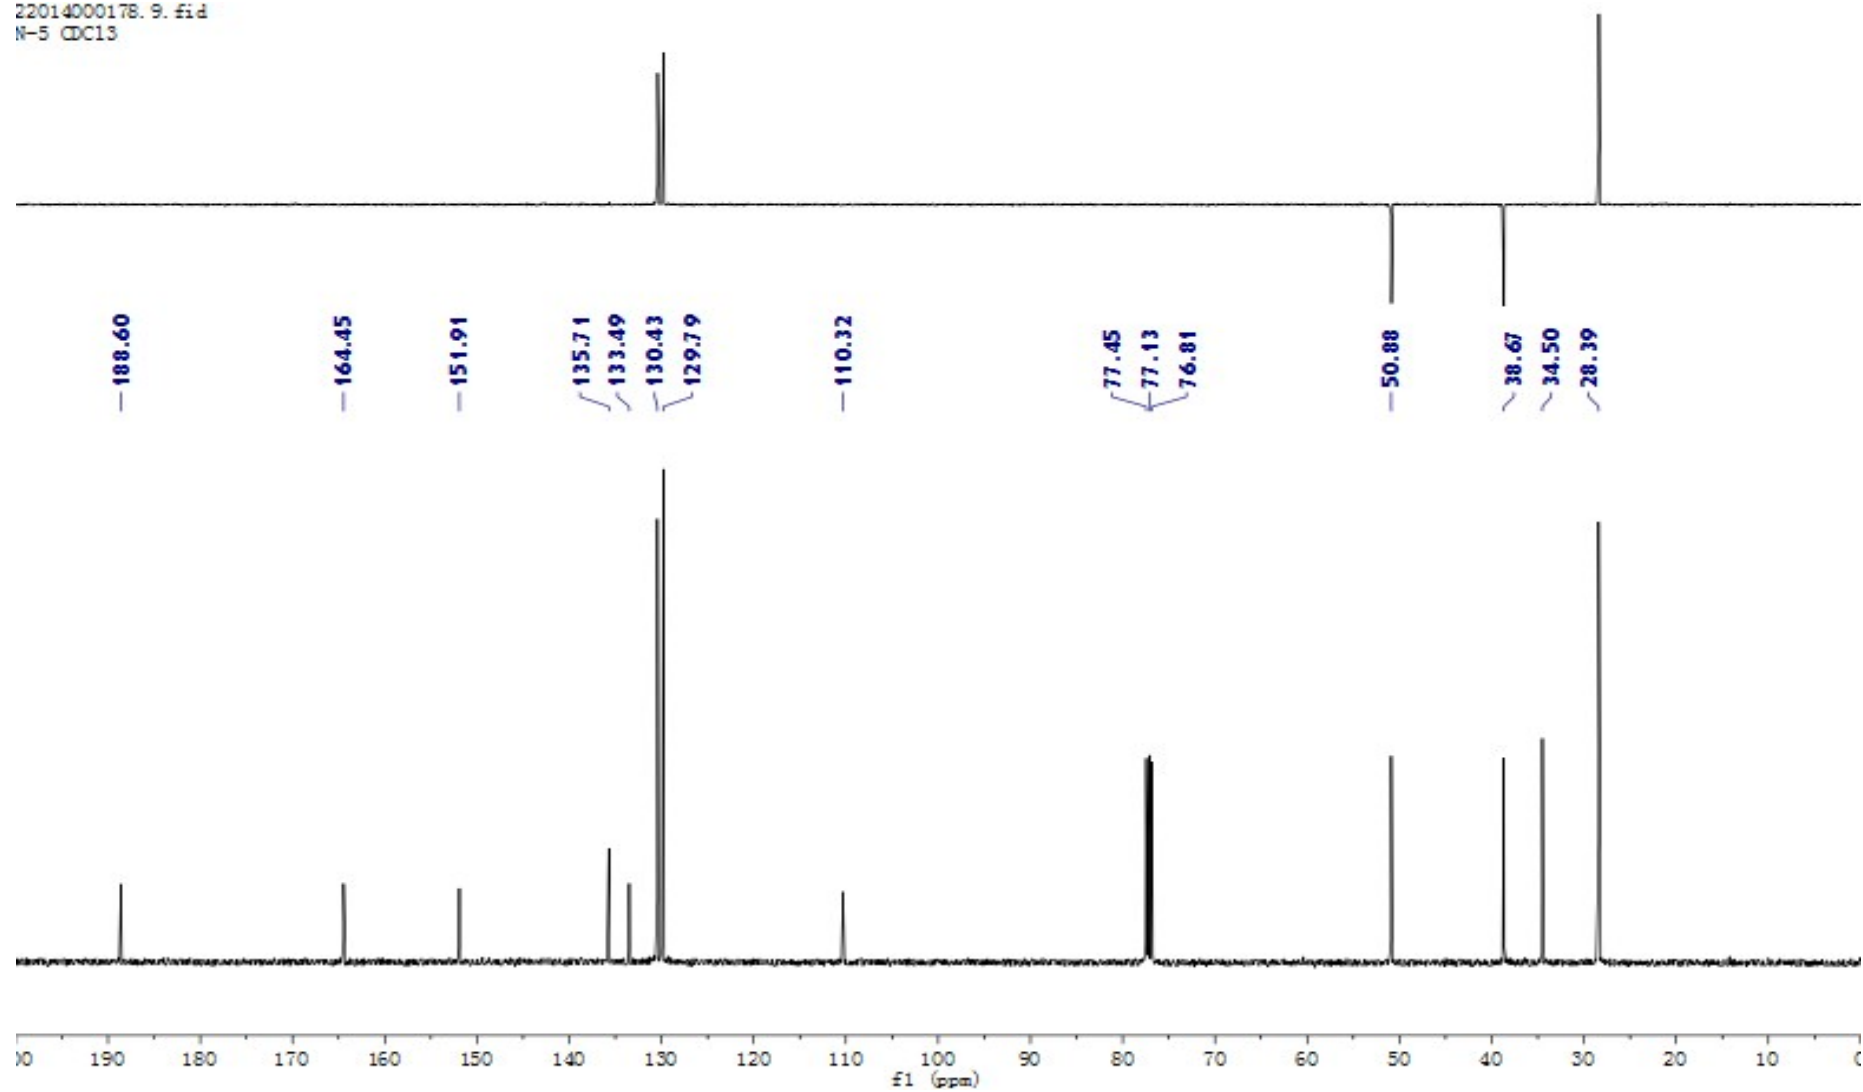

Figure 32.  $^{13}\text{C}$  NMR (100 MHz,  $\text{CDCl}_3$ ) spectra of compound **4p**

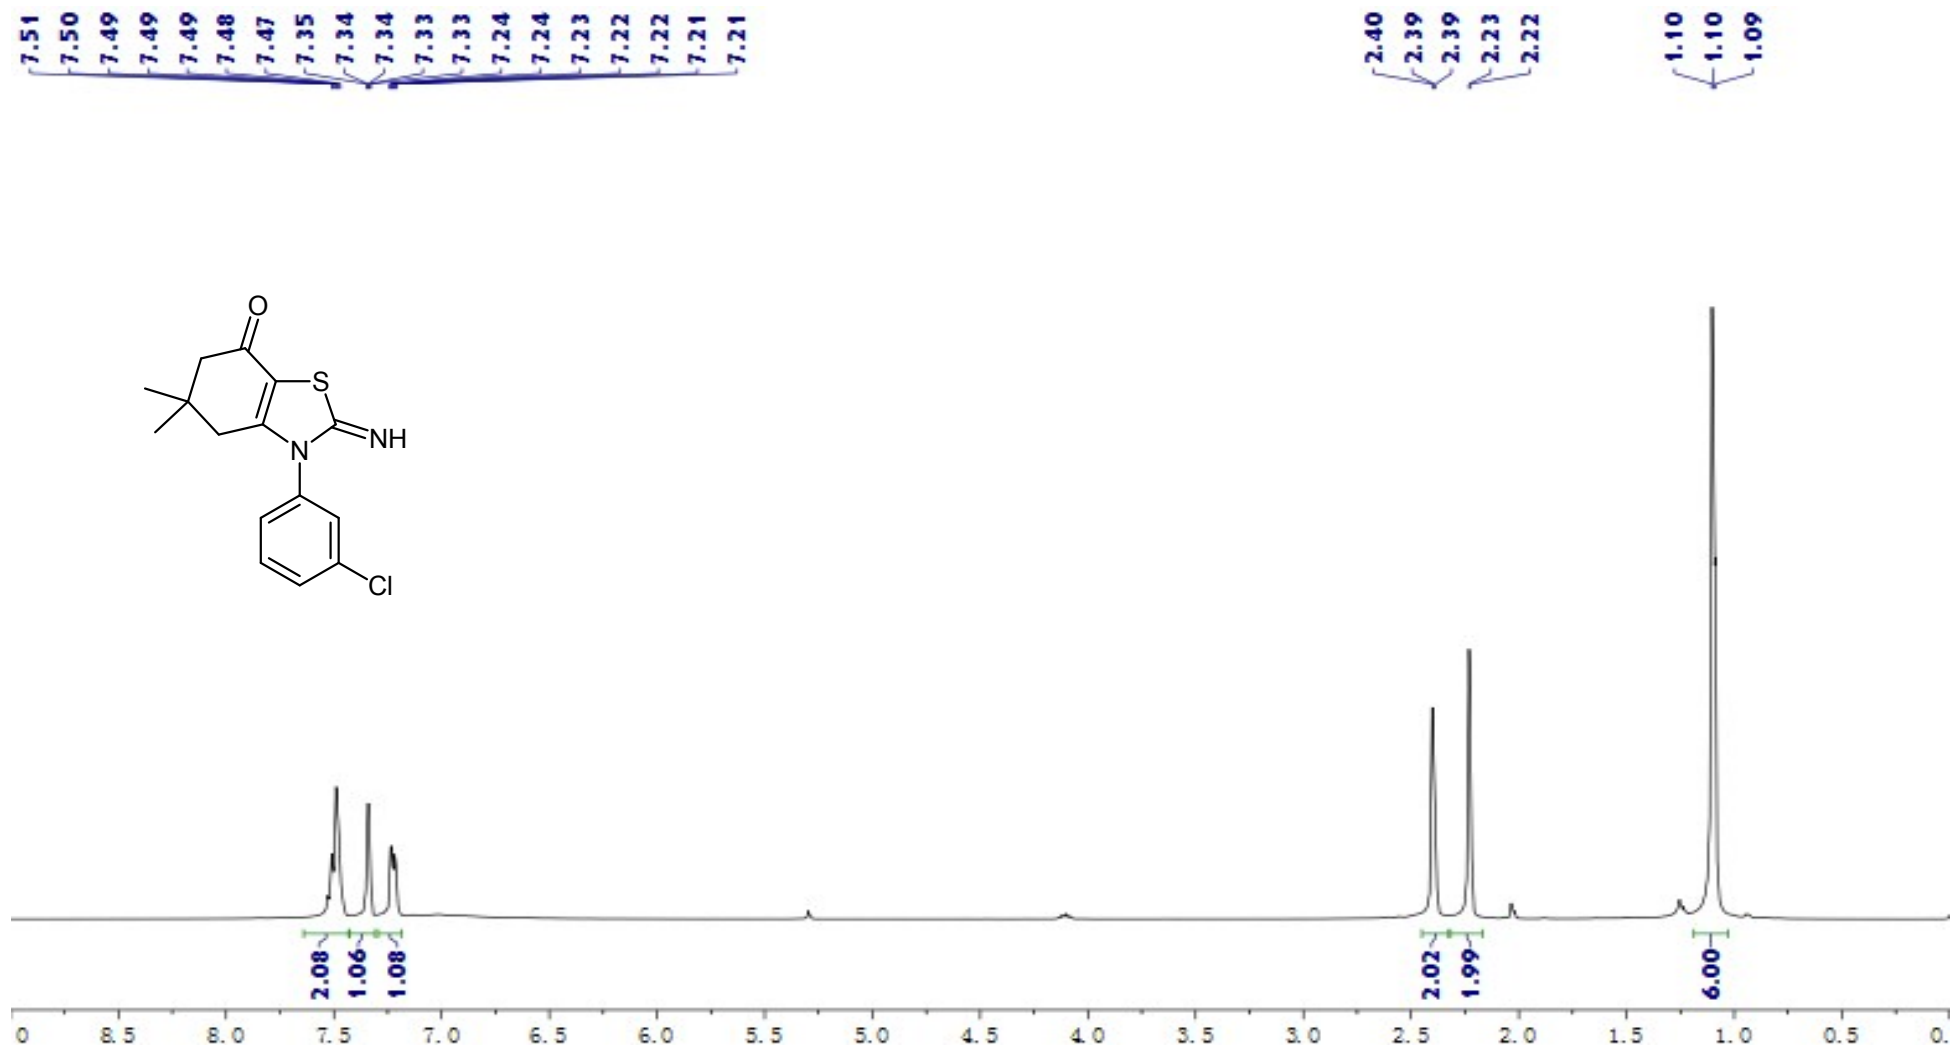

Figure 33. <sup>1</sup>H NMR (400 MHz, CDCl<sub>3</sub>) spectra of compound 4q



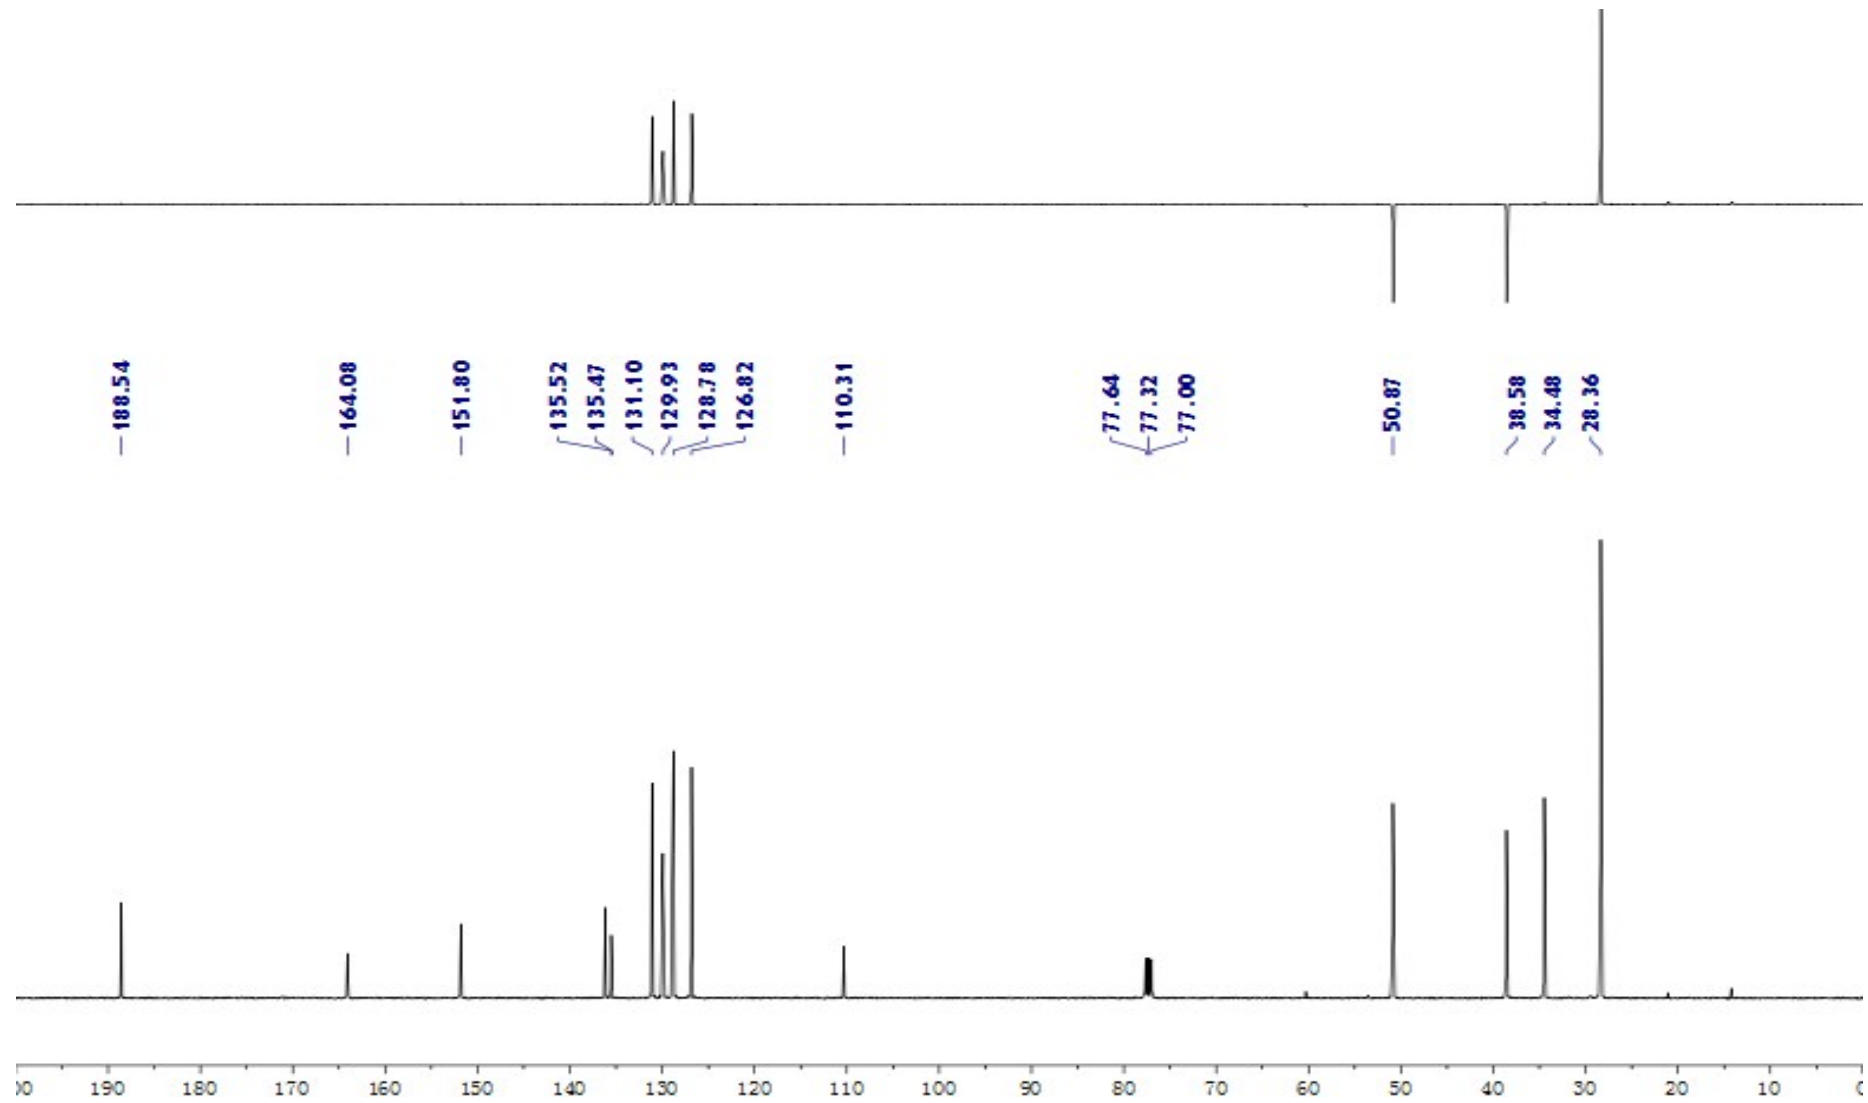

**Figure 34.**  $^{13}\text{C}$  NMR (100 MHz,  $\text{CDCl}_3$ ) spectra of compound **4q**

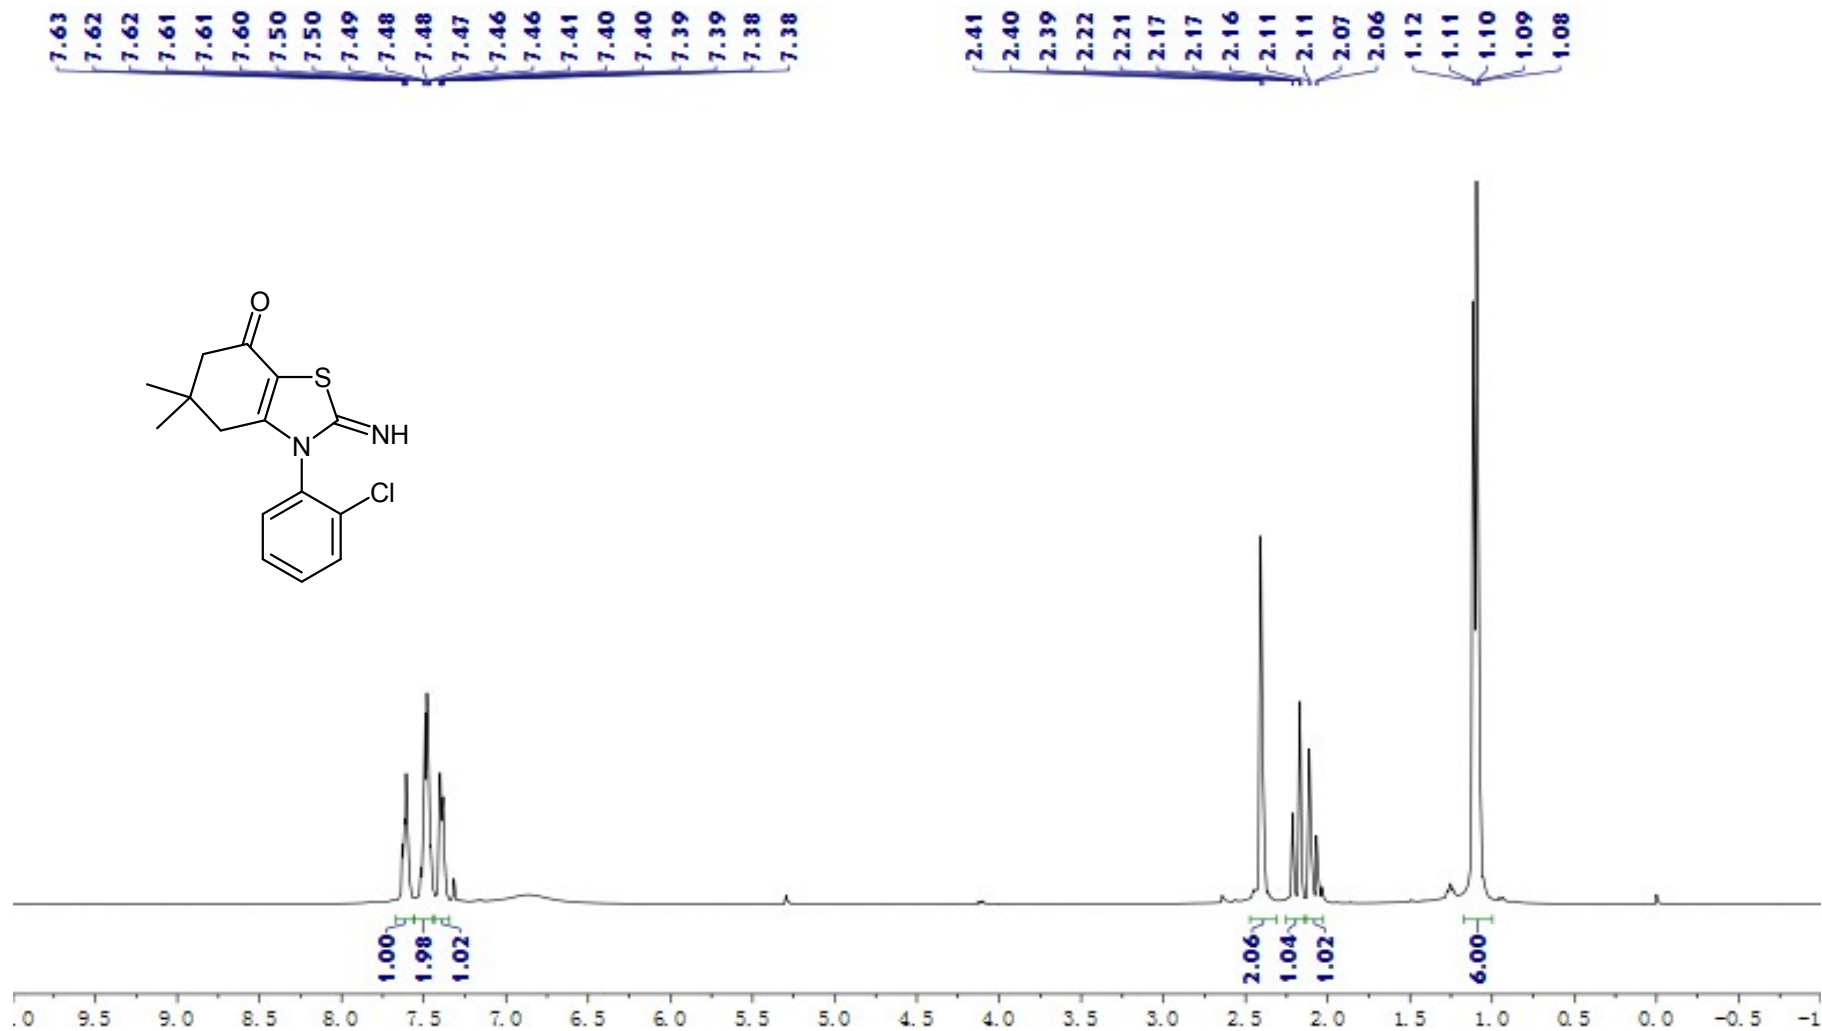

Figure 35. <sup>1</sup>H NMR (400 MHz, CDCl<sub>3</sub>) spectra of compound 4r

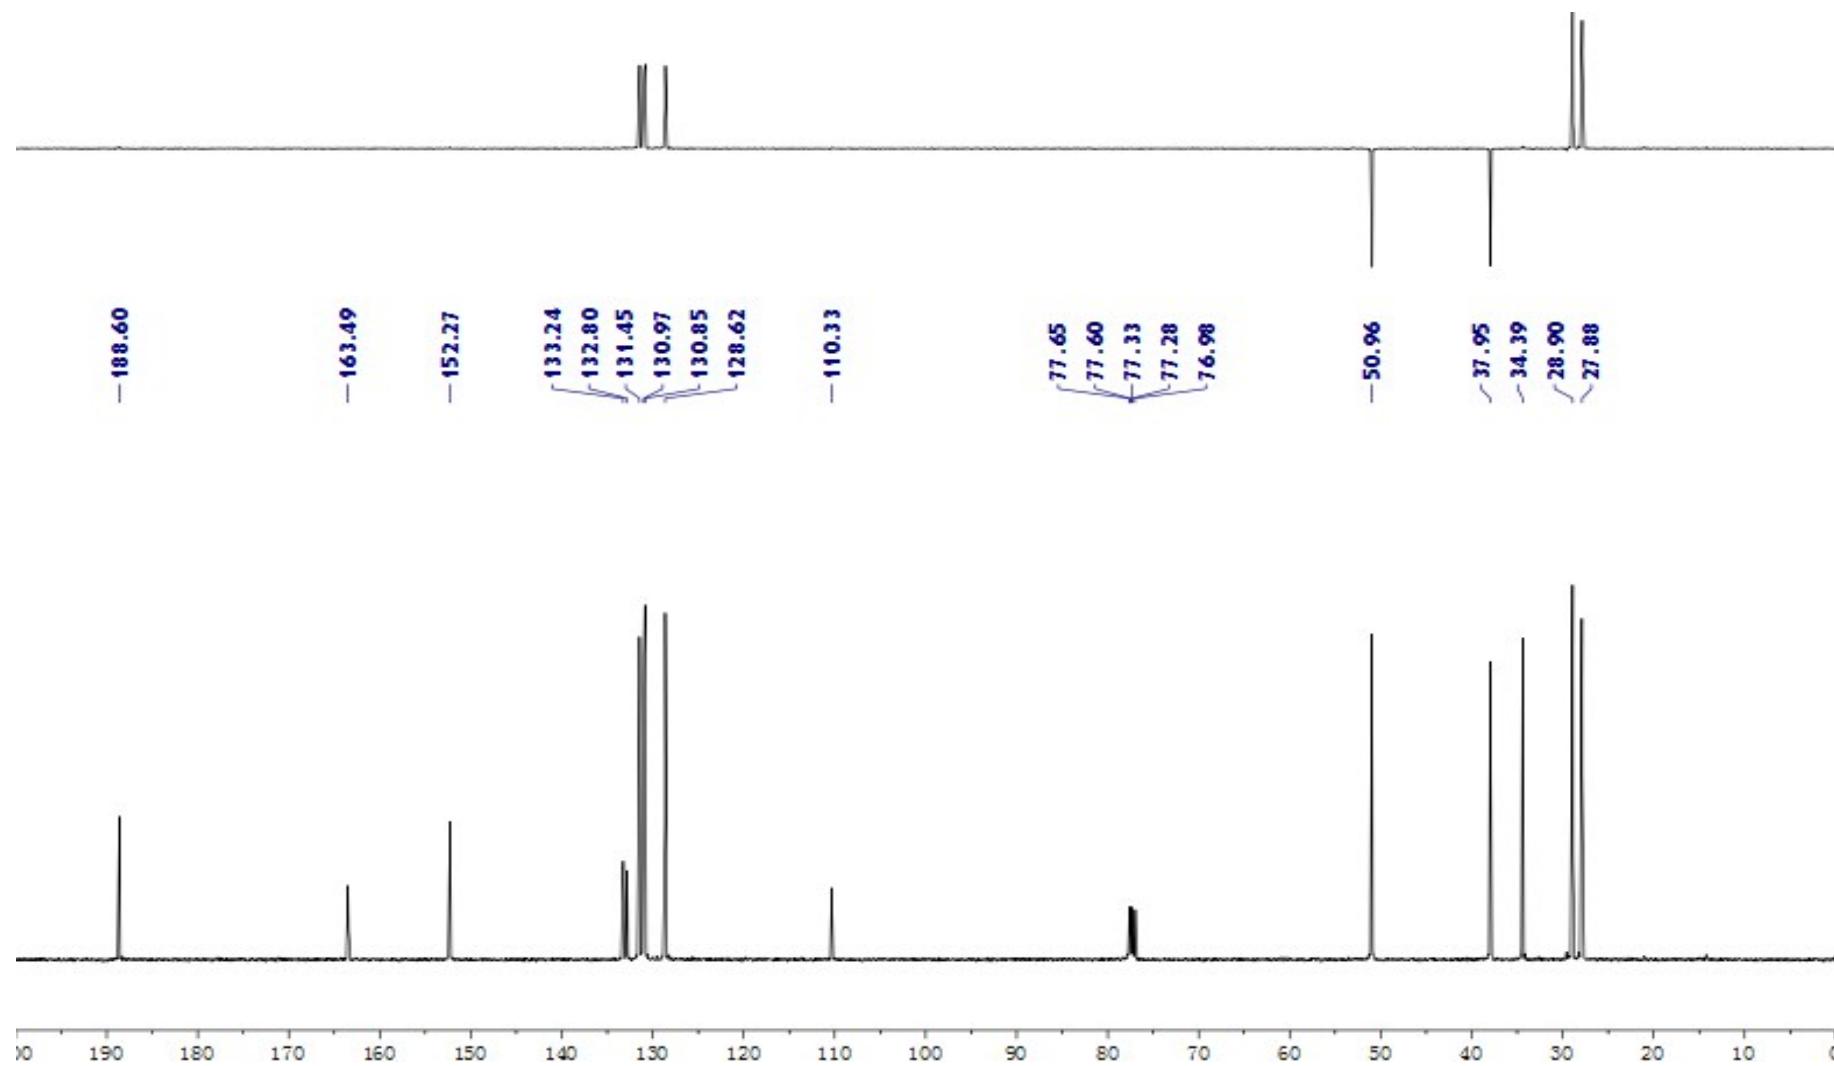

**Figure 36.**  $^{13}\text{C}$  NMR (100 MHz,  $\text{CDCl}_3$ ) spectra of compound **4r**

20160812 N-2 DMSO

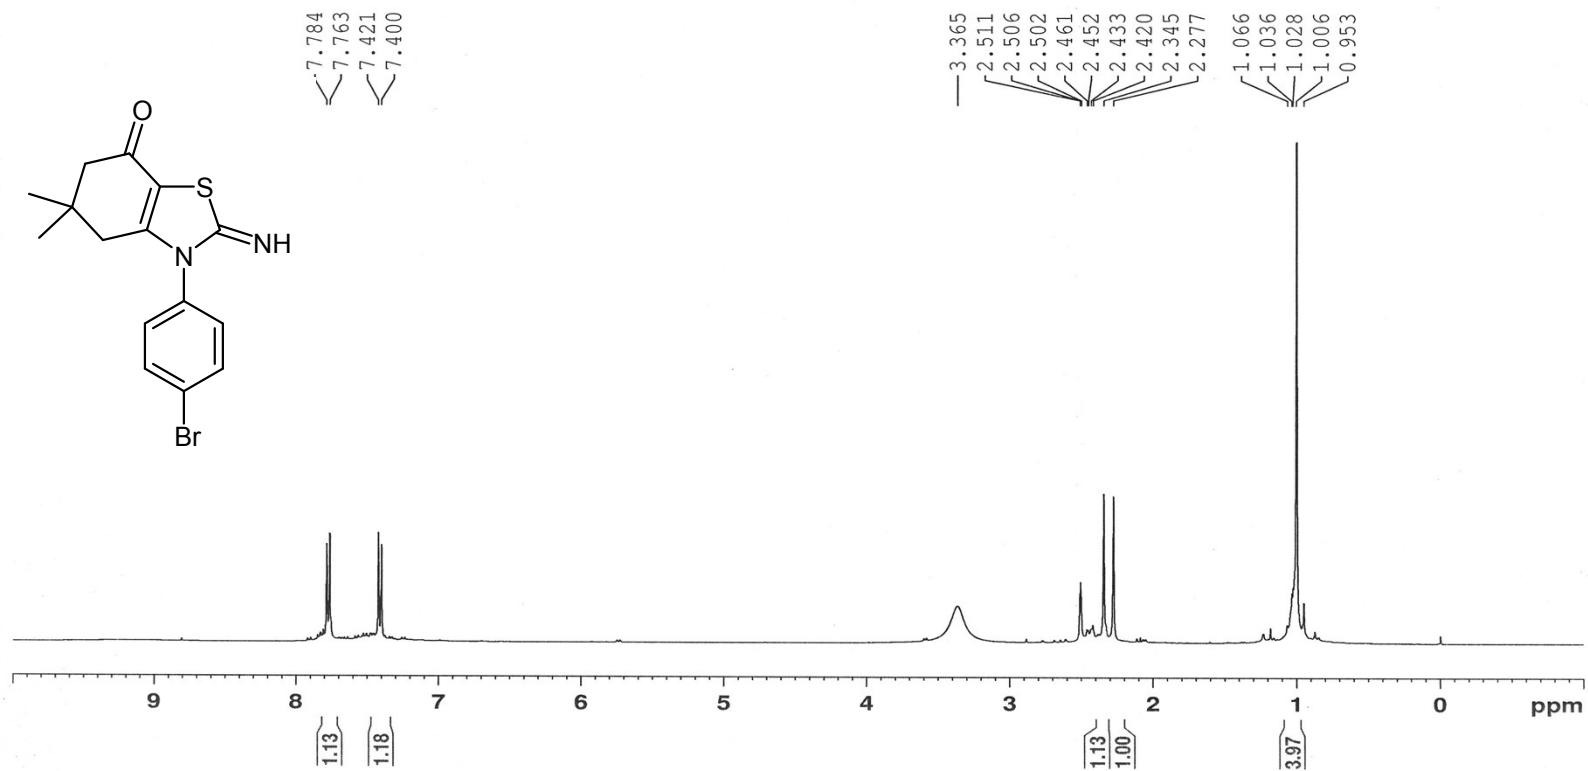

Figure 37. <sup>1</sup>H NMR (400 MHz, DMSO-*d*<sub>6</sub>) spectra of compound 4s

20160812 N-2 DMSO

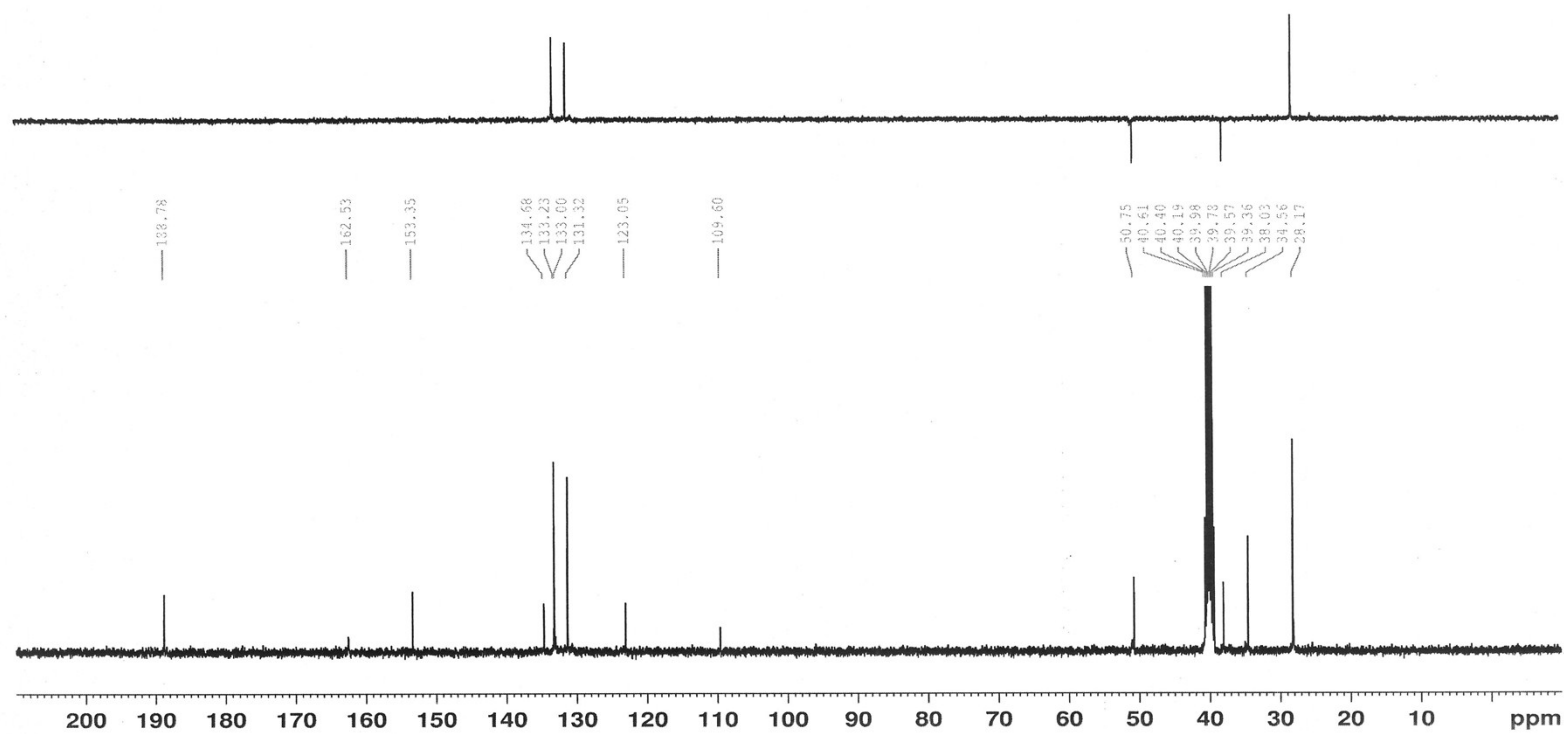

Figure 38.  $^{13}\text{C}$  NMR (100 MHz,  $\text{DMSO}-d_6$ ) spectra of compound 4s

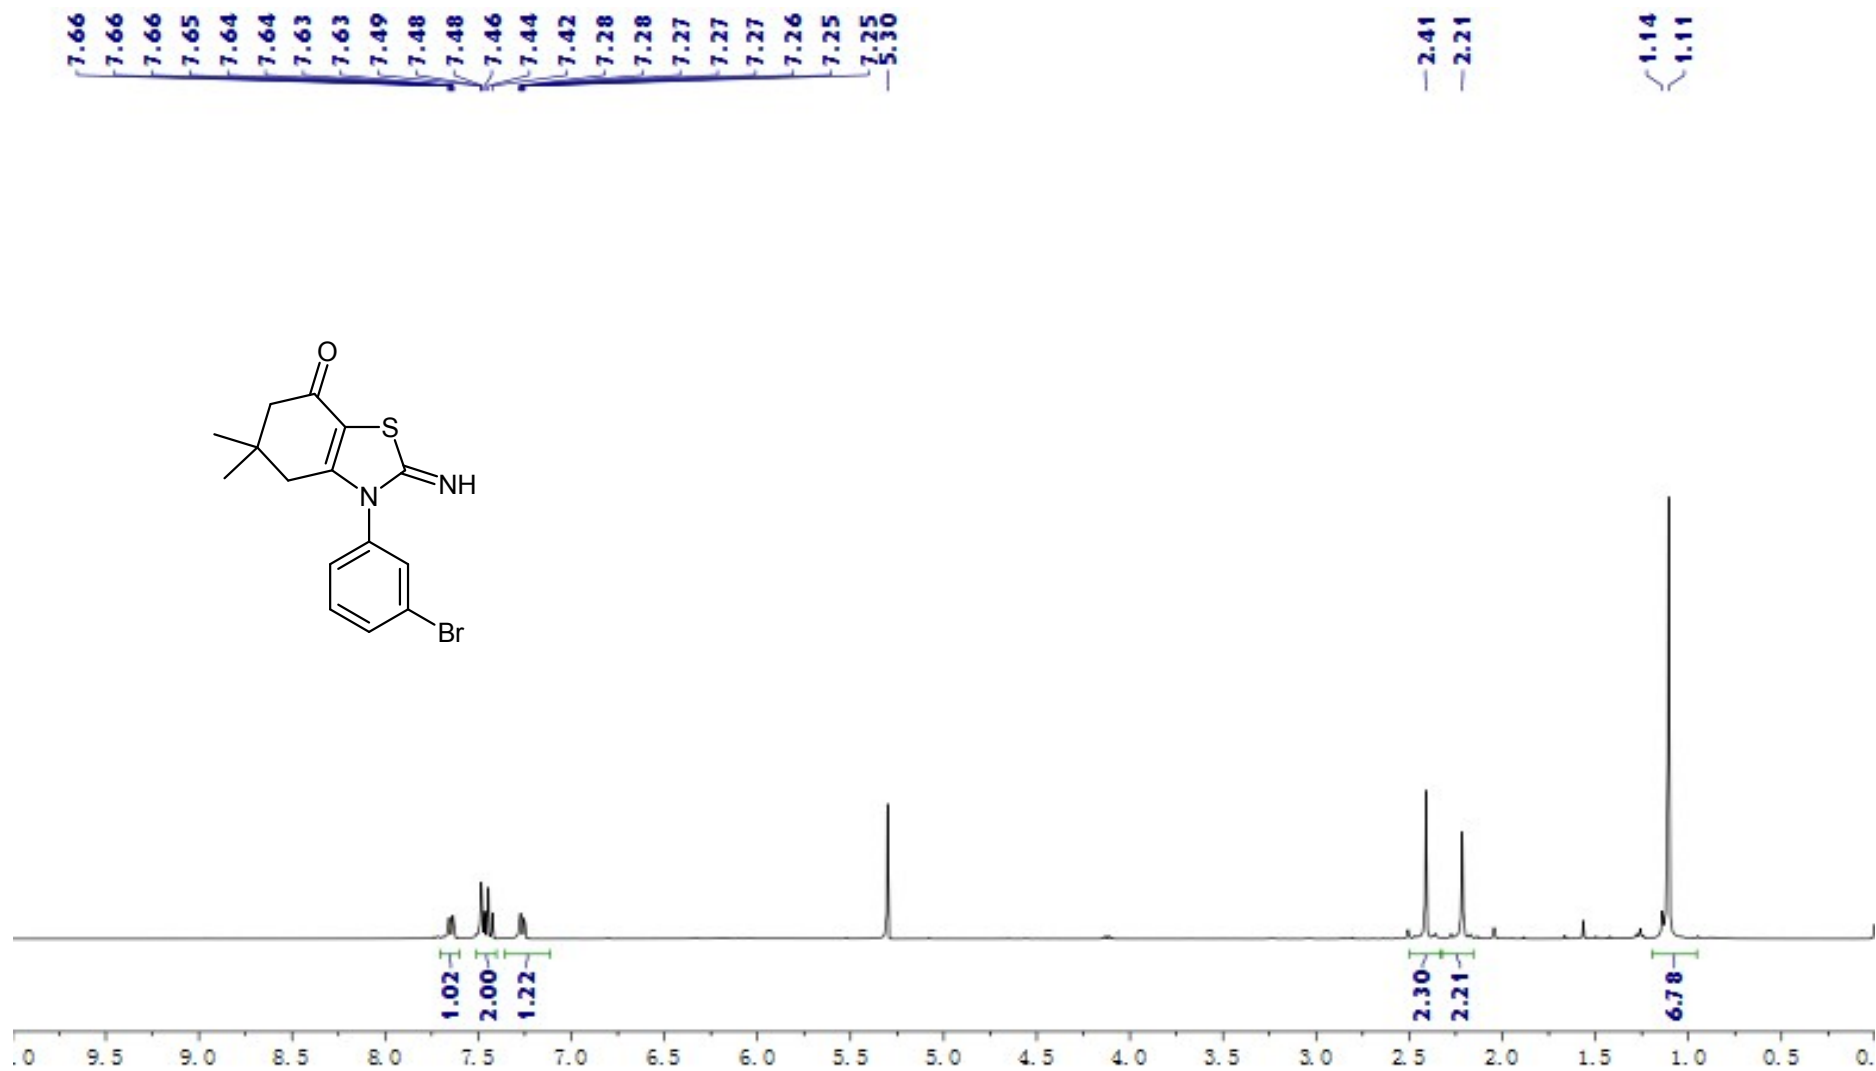

Figure 39.  $^1\text{H}$  NMR (400 MHz,  $\text{CDCl}_3$ ) spectra of compound 4t

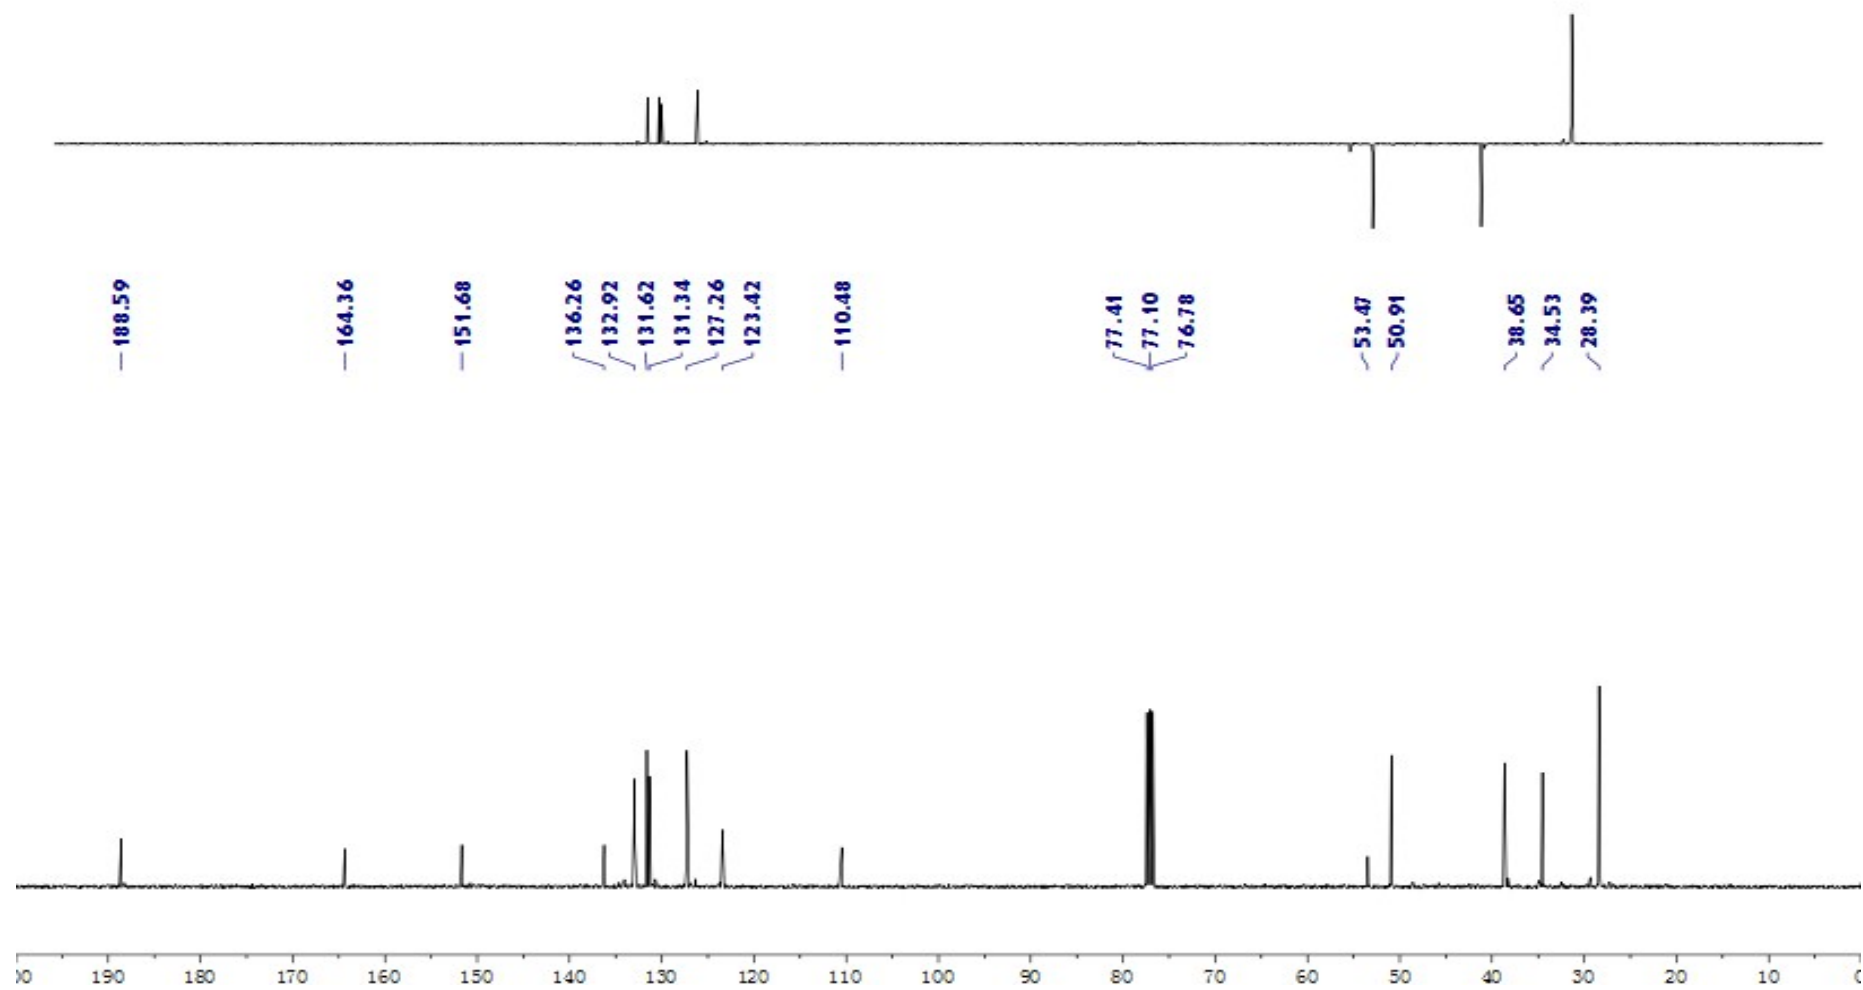

**Figure 40.**  $^{13}\text{C}$  NMR (100 MHz, CDCl<sub>3</sub>) spectra of compound **4t**

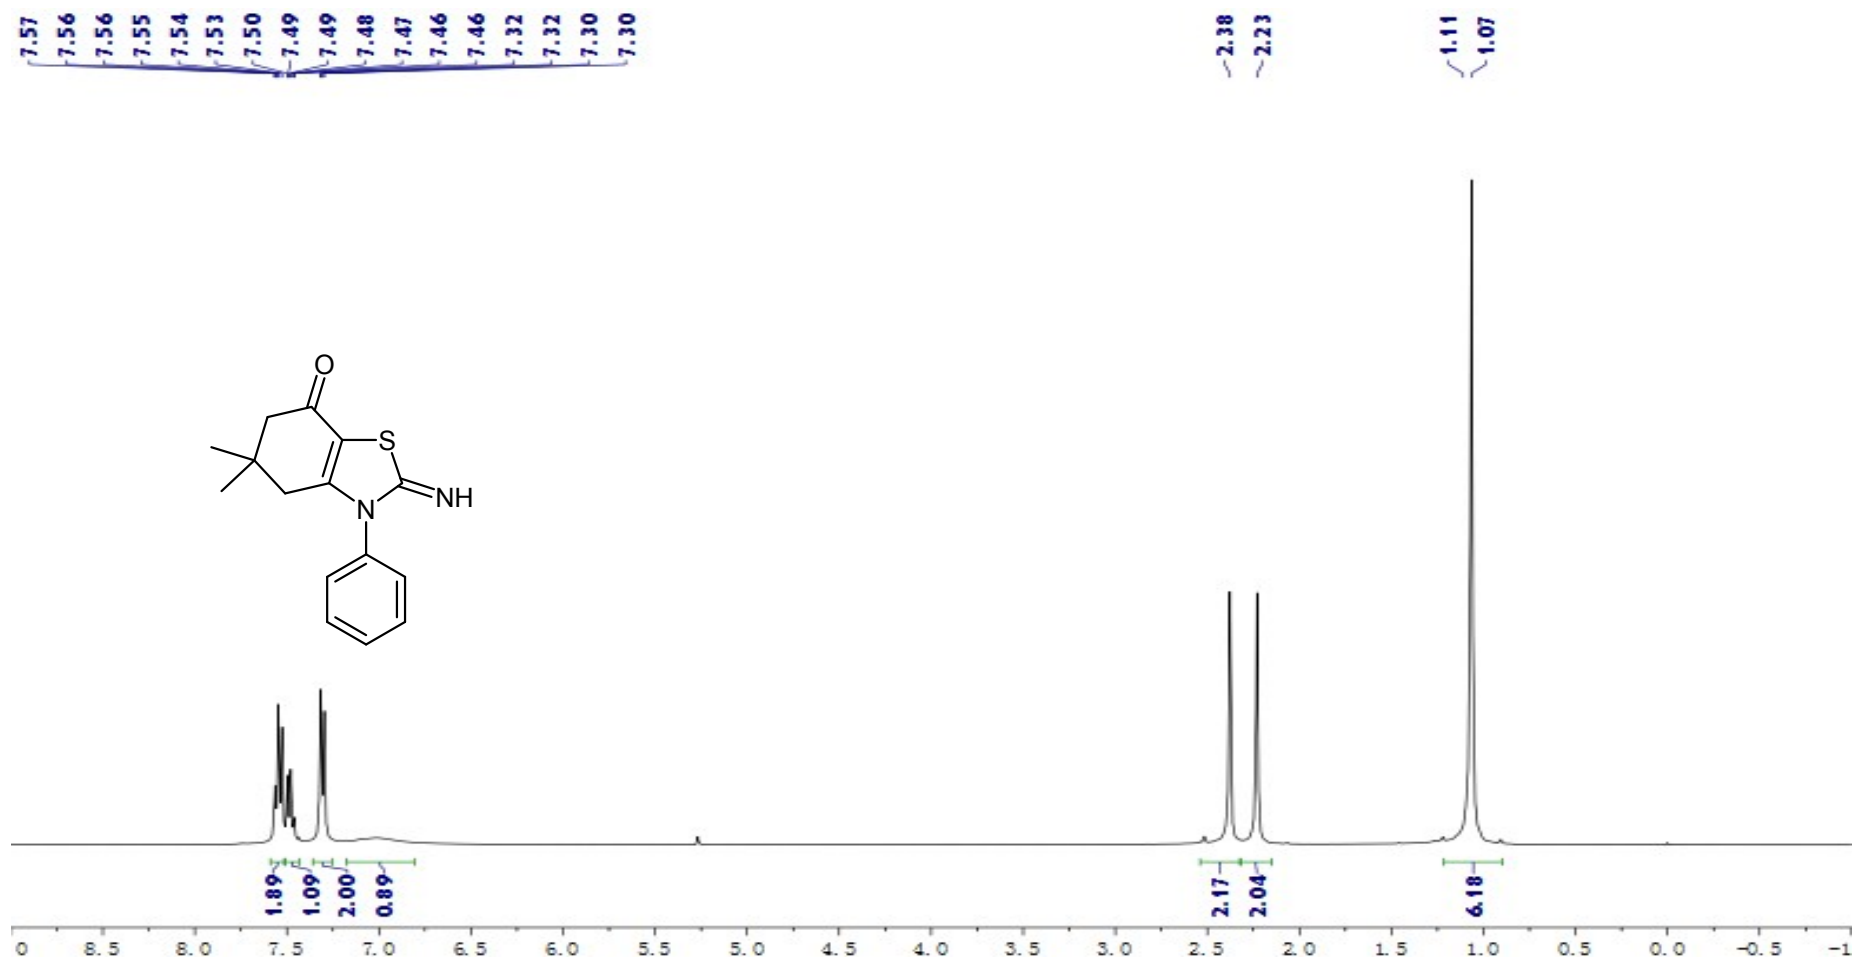

Figure 41. <sup>1</sup>H NMR (400 MHz, CDCl<sub>3</sub>) spectra of compound 4u



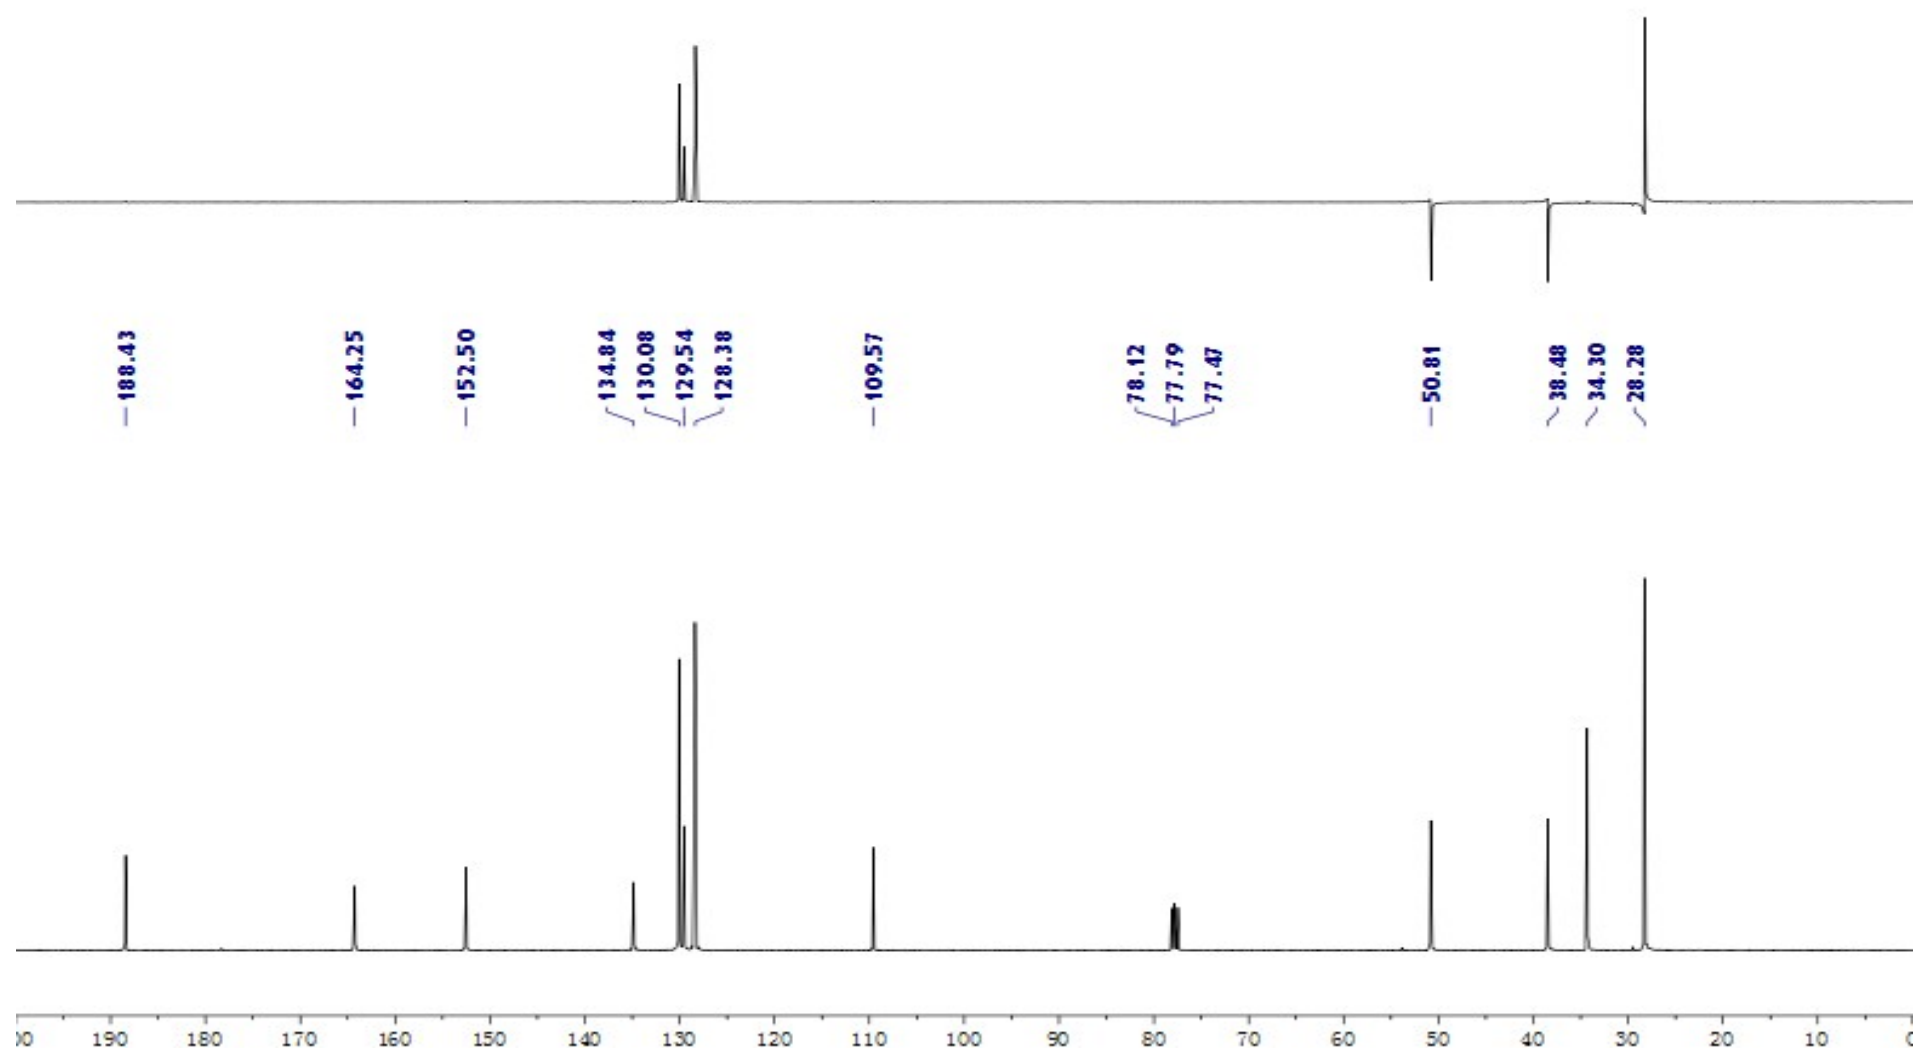

**Figure 42.**  $^{13}\text{C}$  NMR (100 MHz,  $\text{CDCl}_3$ ) spectra of compound **4u**

22014000178. 1. fid  
N-8 CDCl3

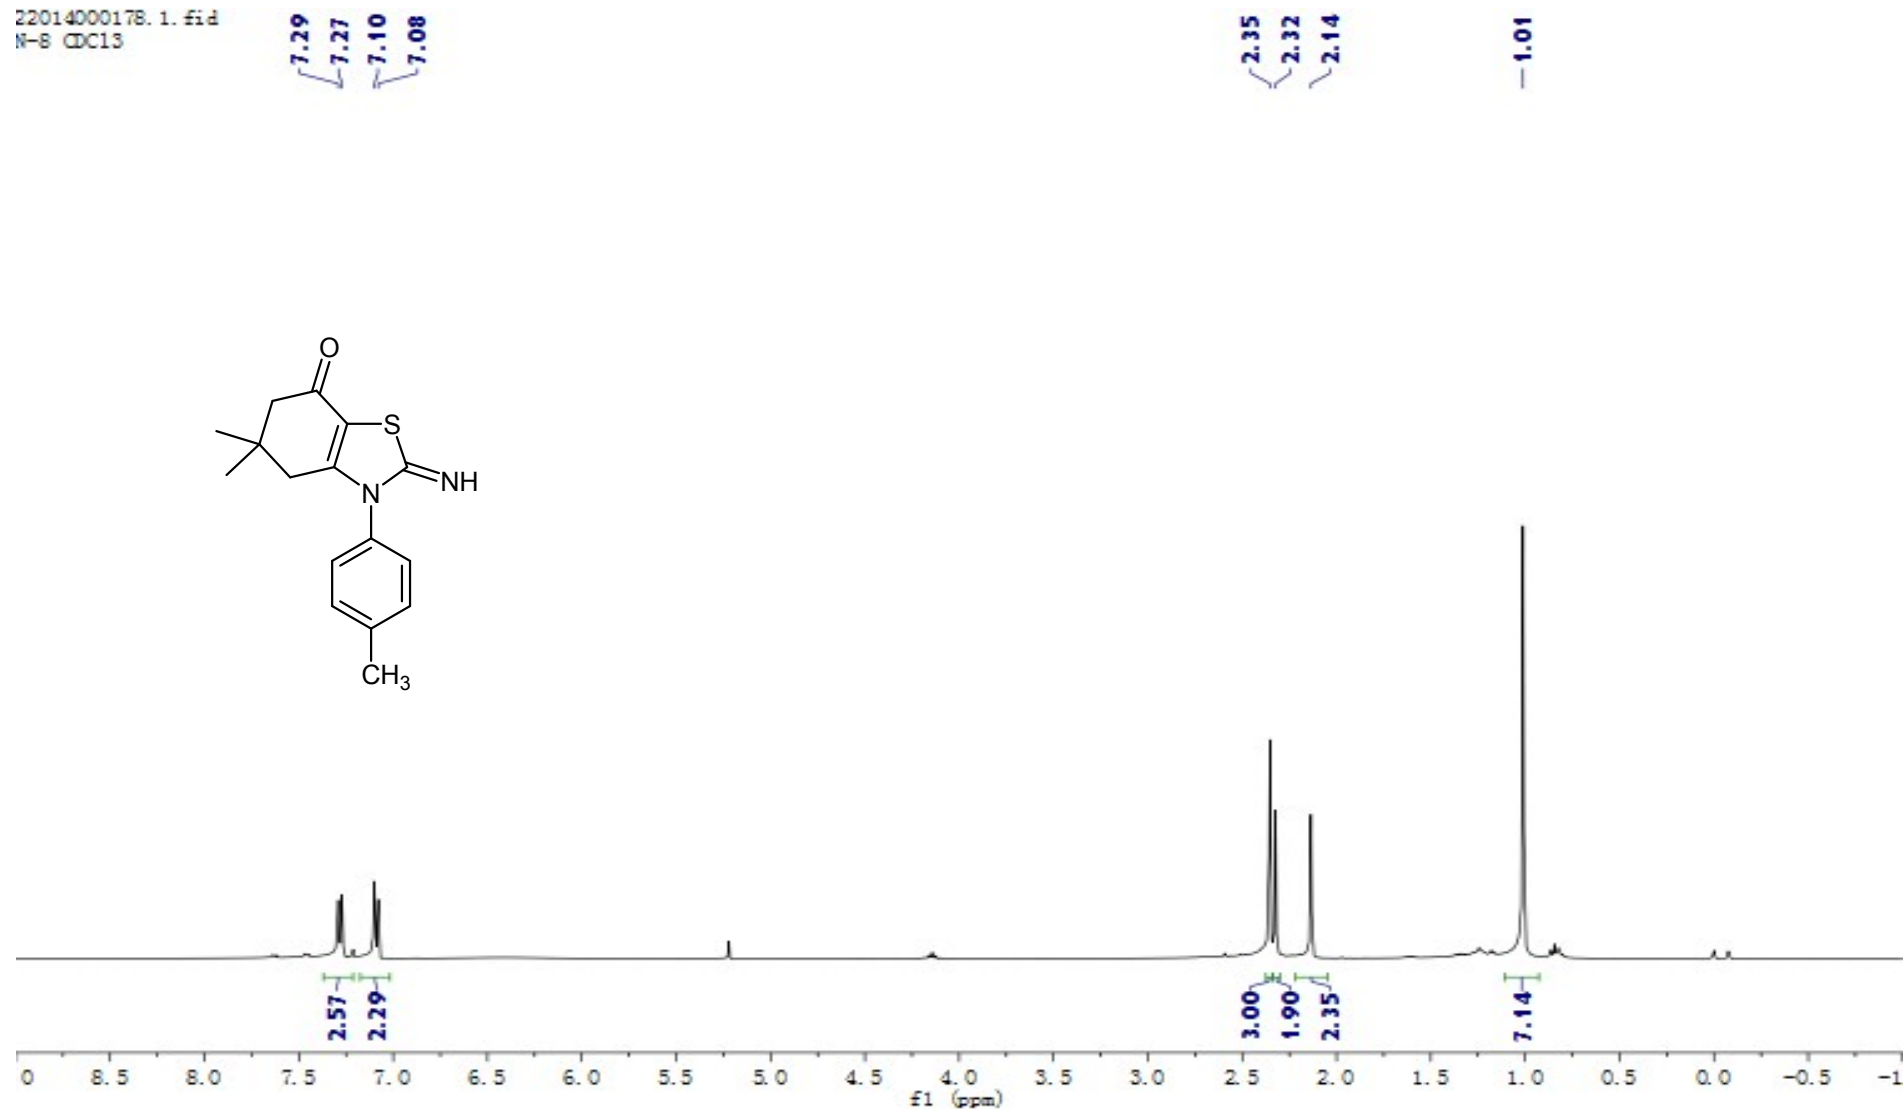

Figure 43.  $^1\text{H}$  NMR (400 MHz,  $\text{CDCl}_3$ ) spectra of compound 4v

22014000178. 3. fid  
N-8 CDCl3

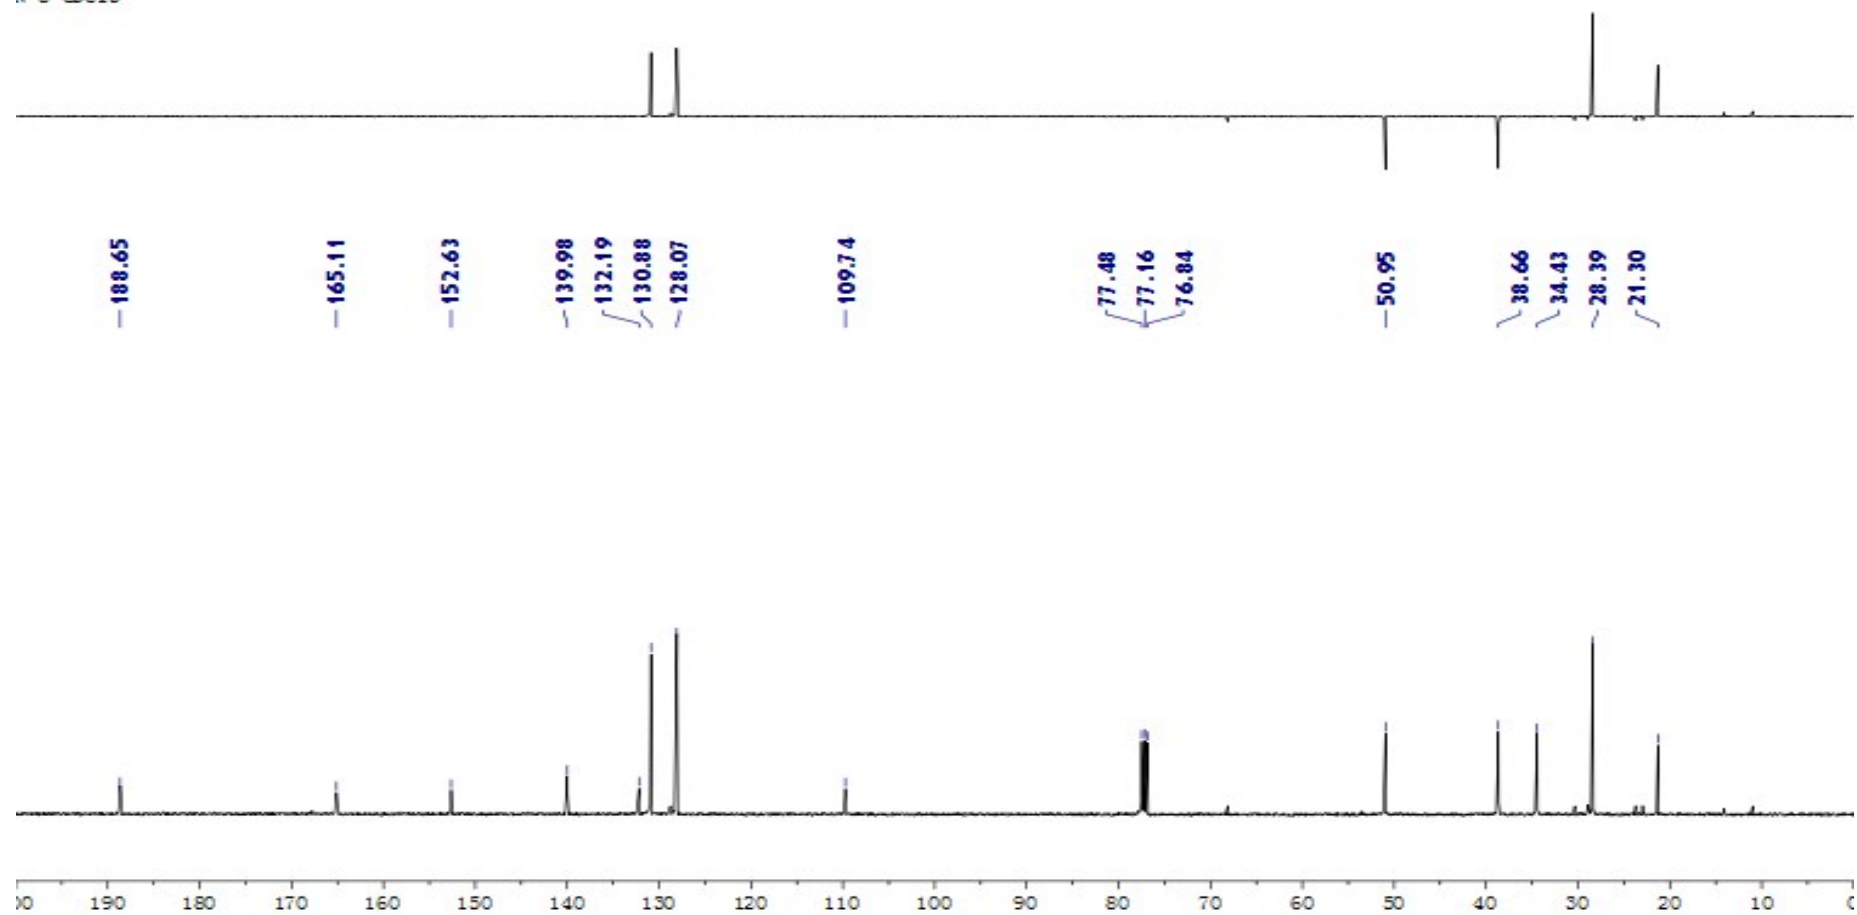

**Figure 44.**  $^{13}\text{C}$  NMR (100 MHz,  $\text{CDCl}_3$ ) spectra of compound **4v**

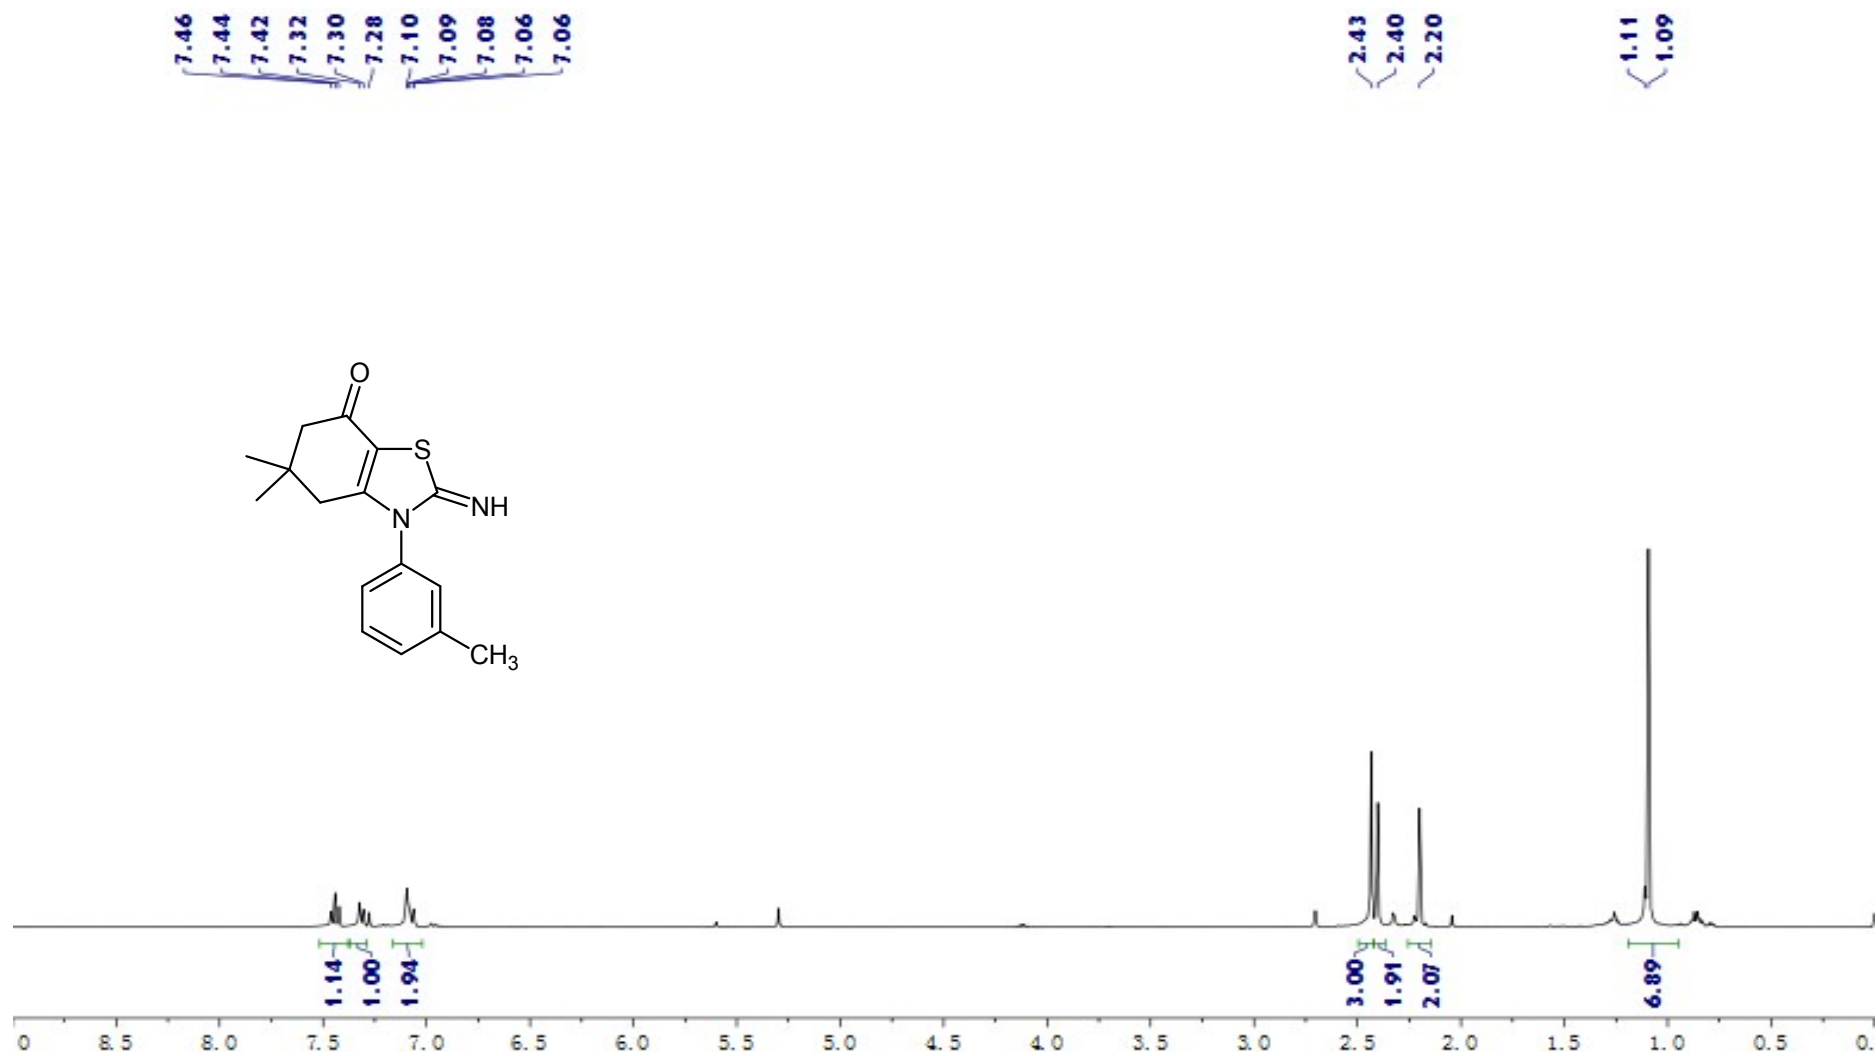

Figure 45. <sup>1</sup>H NMR (400 MHz, CDCl<sub>3</sub>) spectra of compound 4w

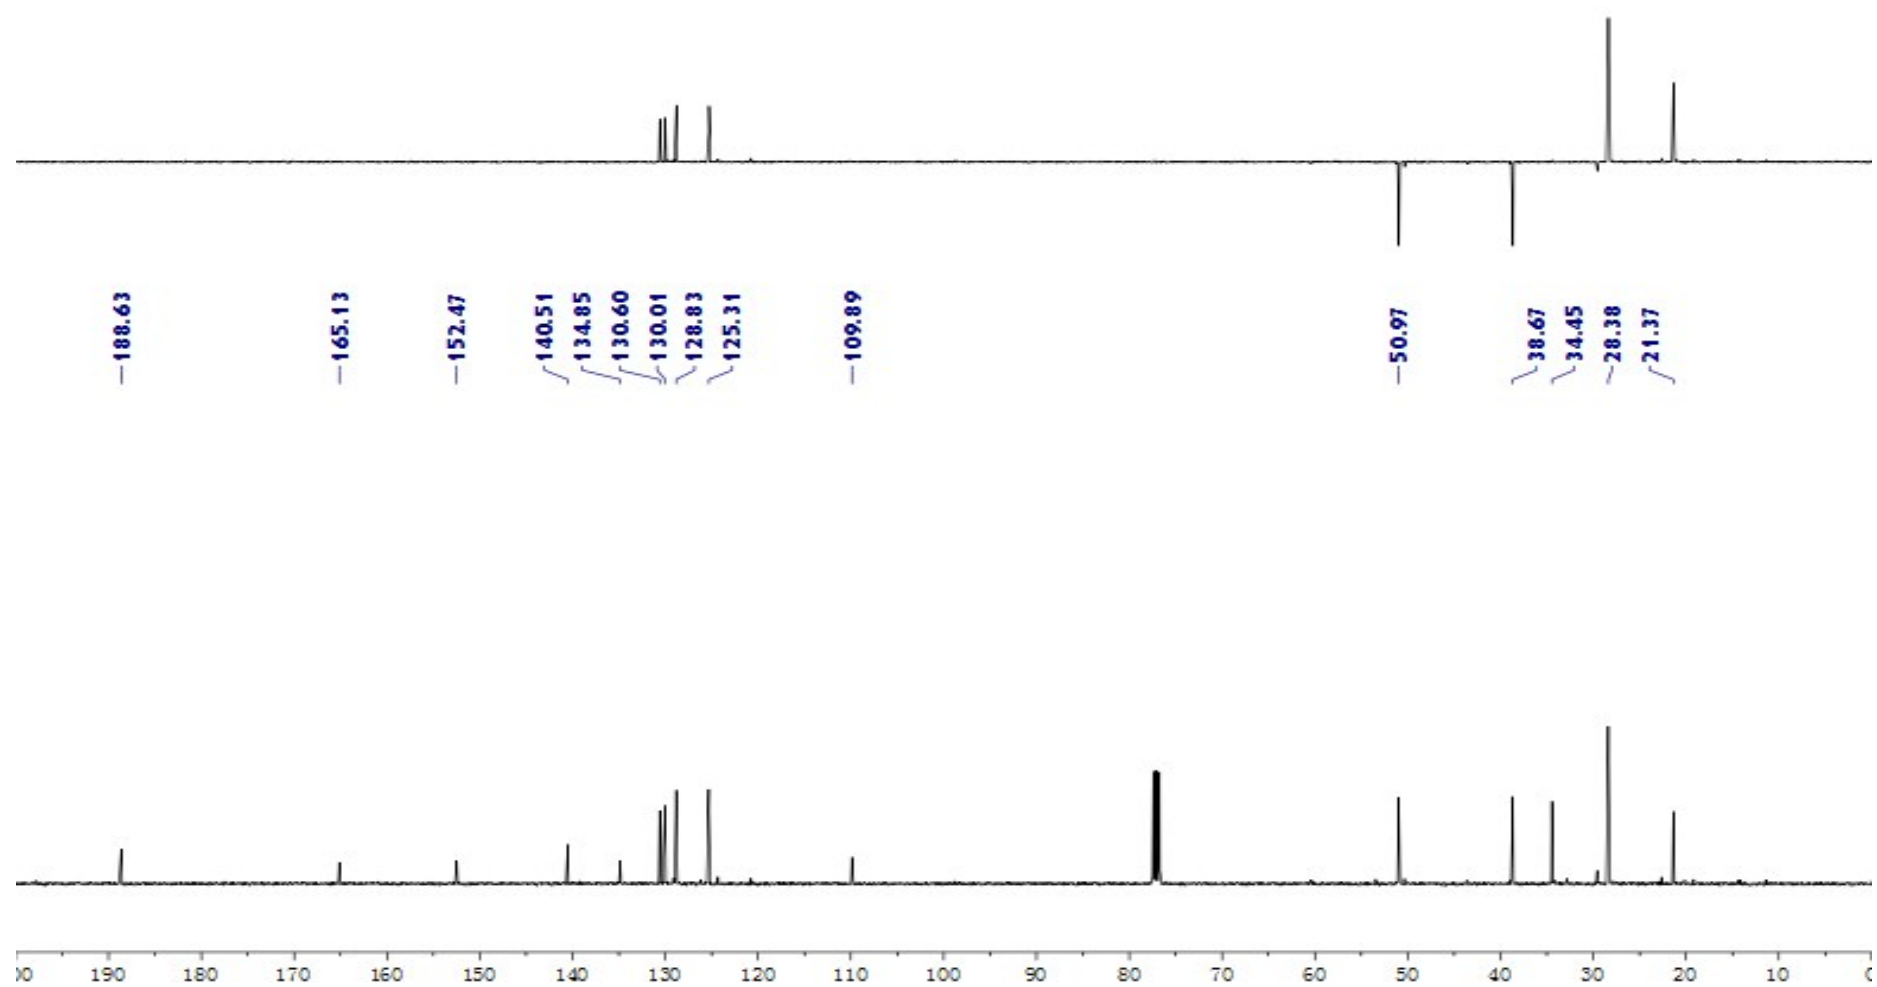

**Figure 46.** <sup>13</sup>C NMR (100 MHz, CDCl<sub>3</sub>) spectra of compound 4w

7-3

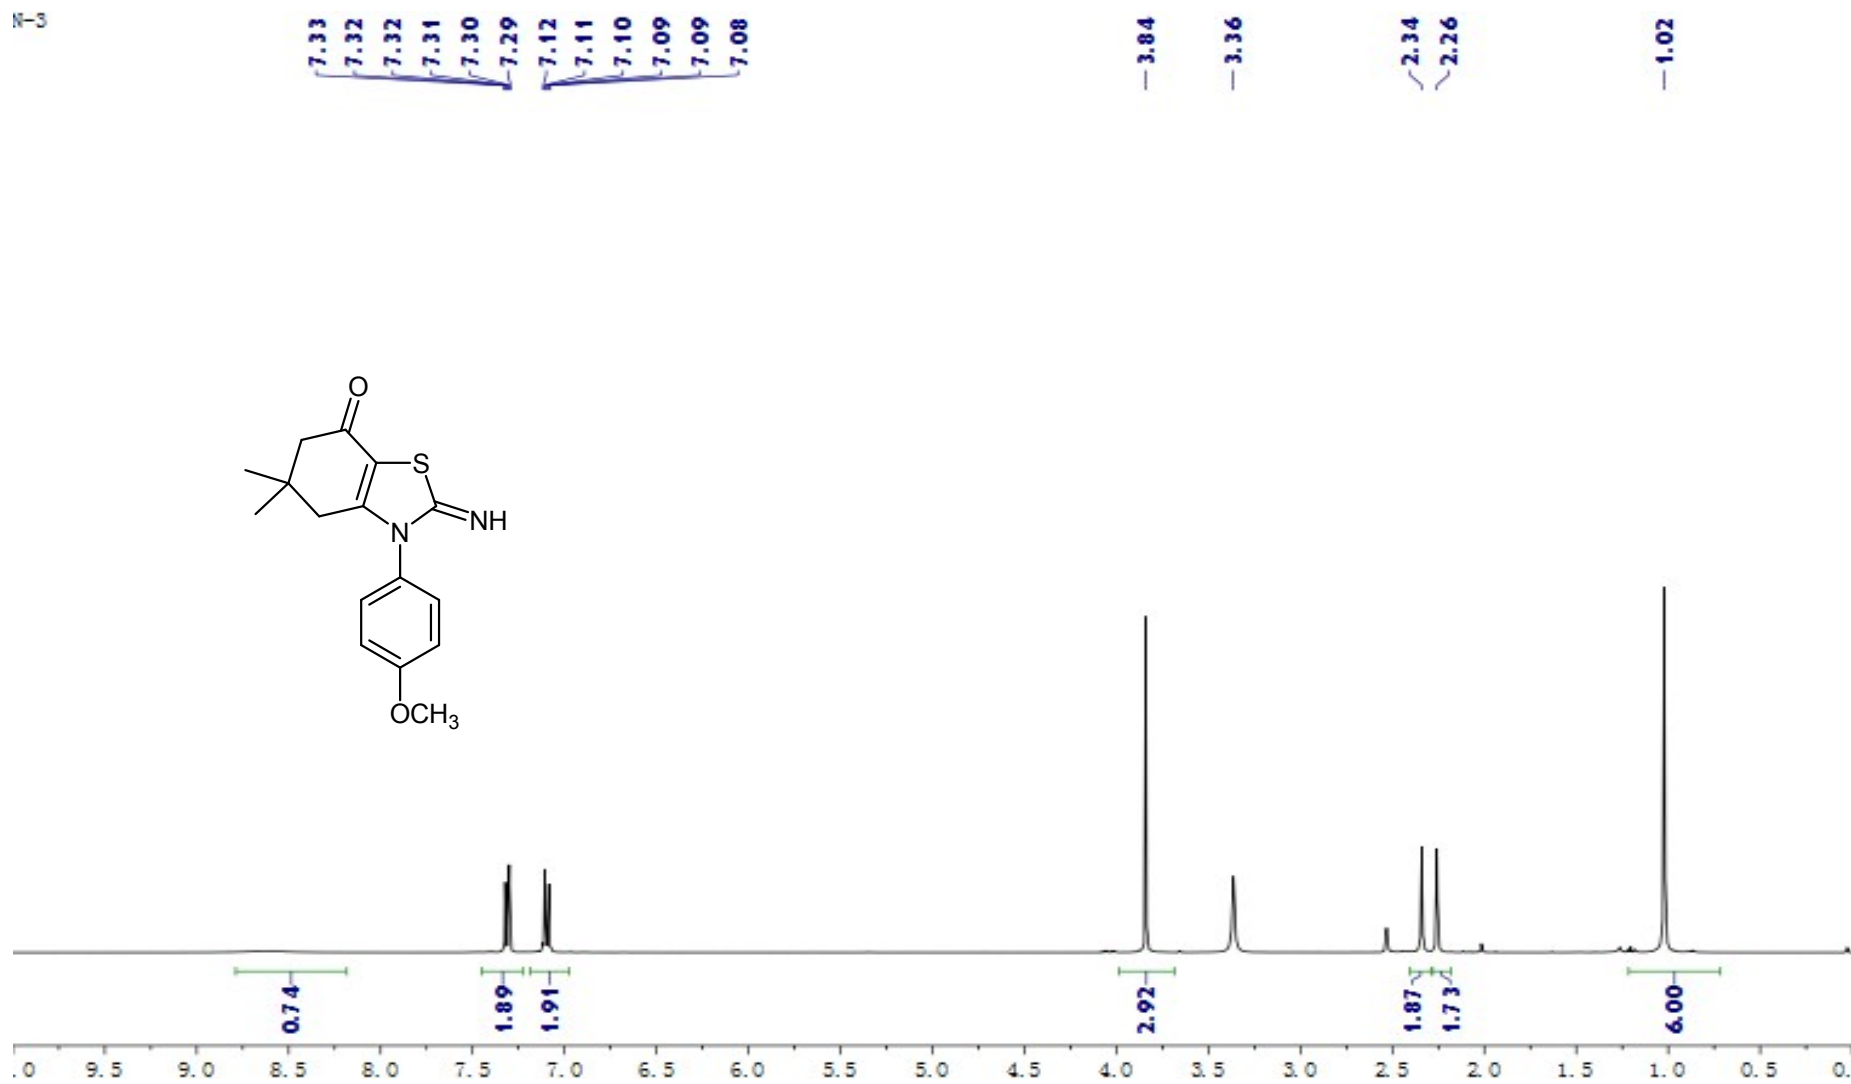

Figure 47. <sup>1</sup>H NMR (400 MHz, DMSO-*d*<sub>6</sub>) spectra of compound 4x

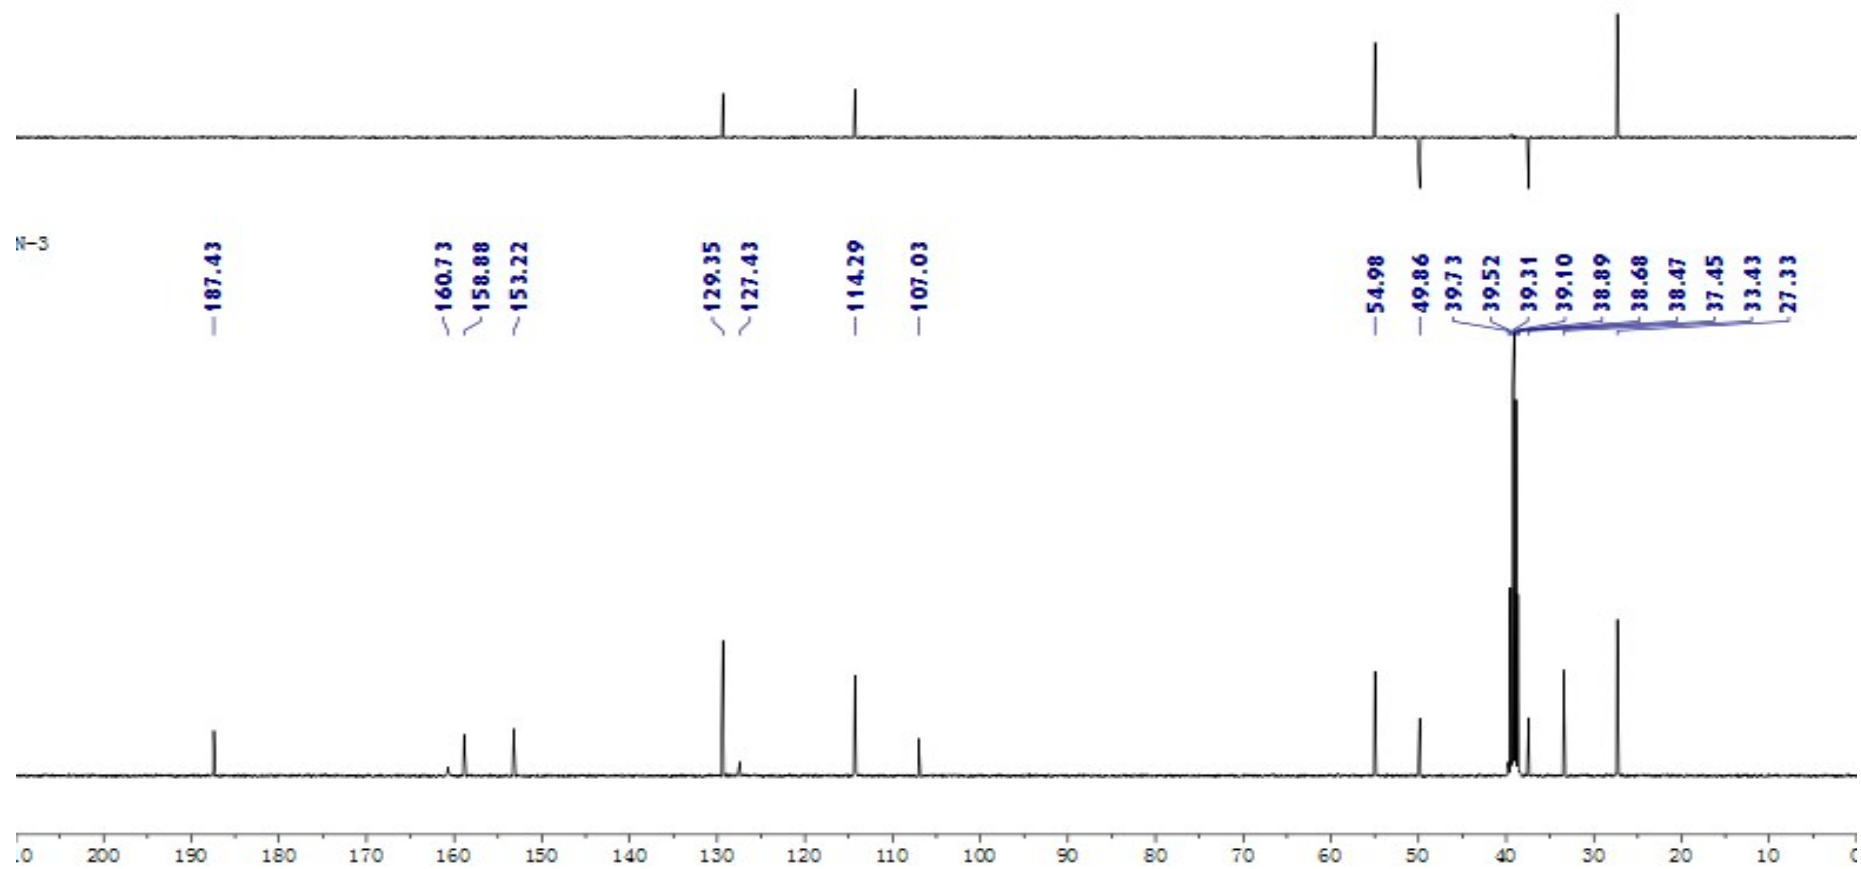

**Figure 48.**  $^{13}\text{C}$  NMR (100 MHz,  $\text{DMSO-}d_6$ ) spectra of compound **4x**

-7.29

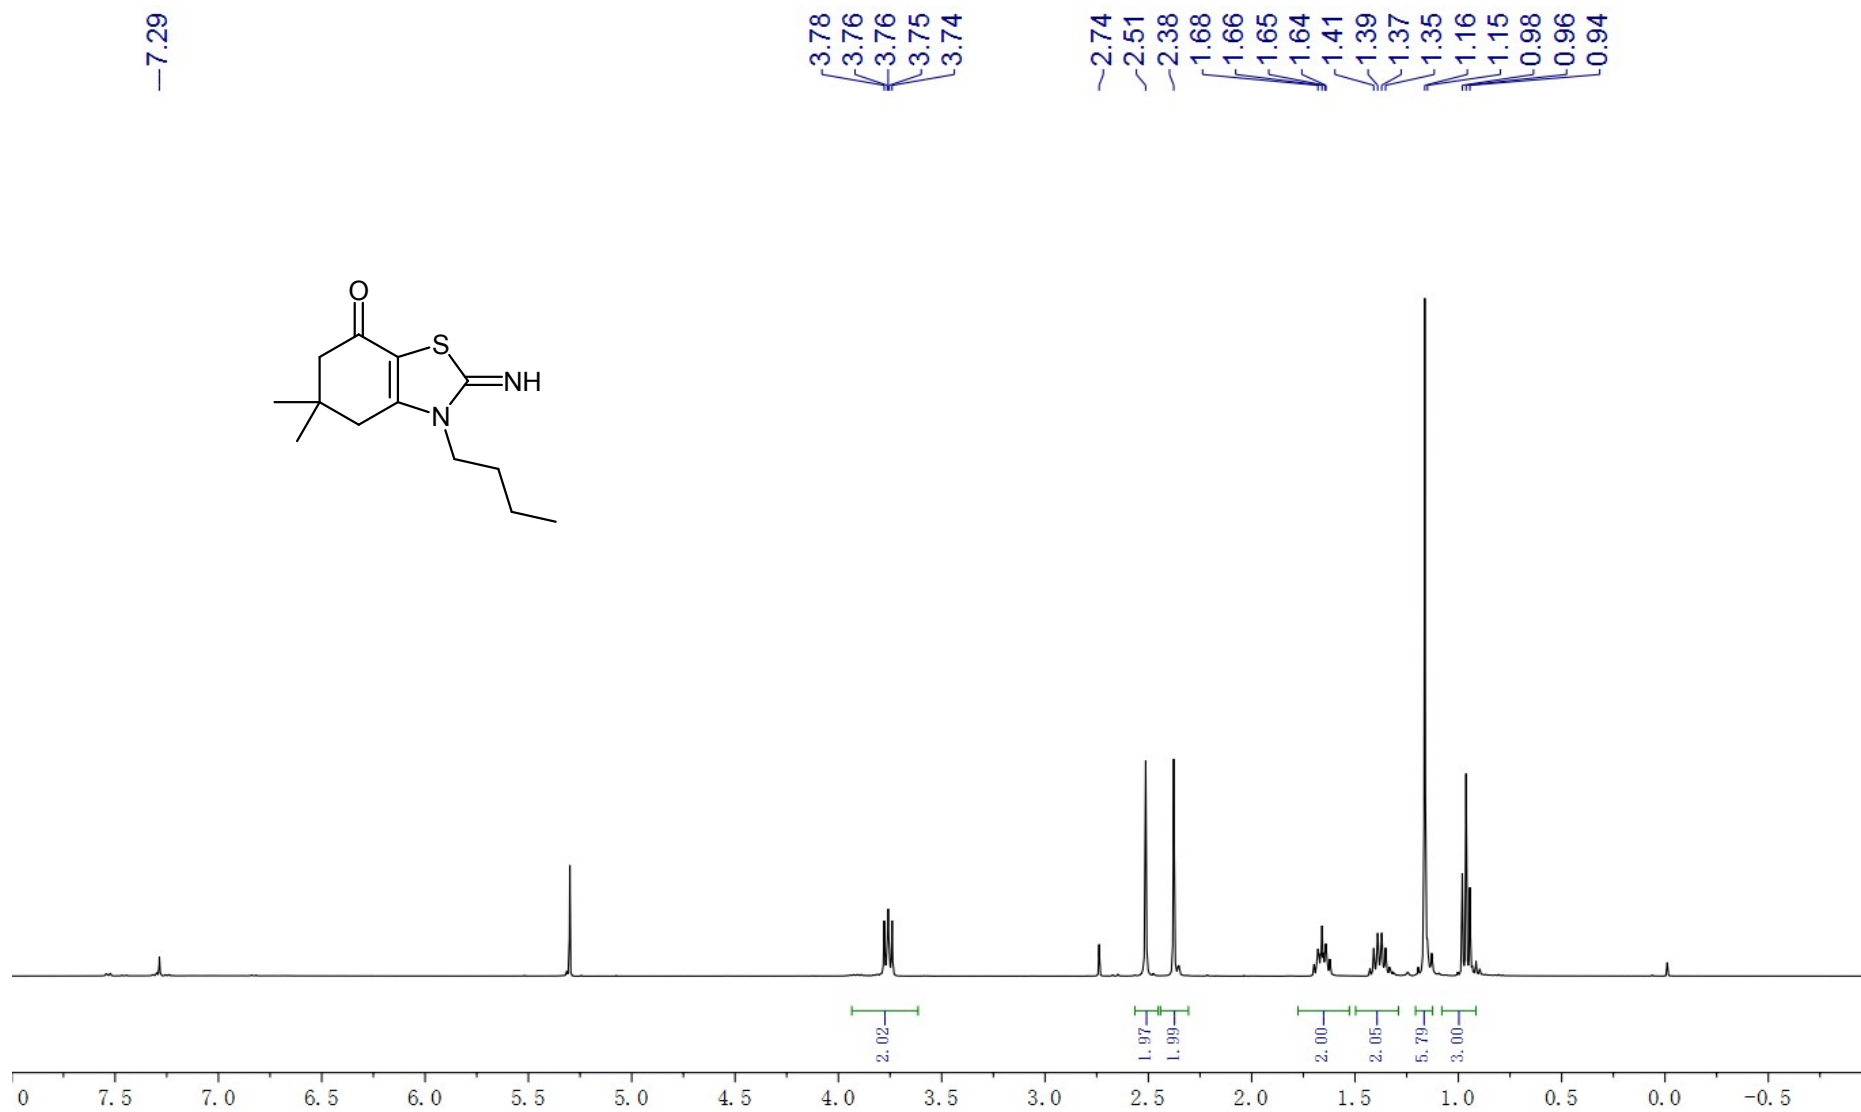

Figure 49. <sup>1</sup>H NMR (400 MHz, CDCl<sub>3</sub>) spectra of compound 4y



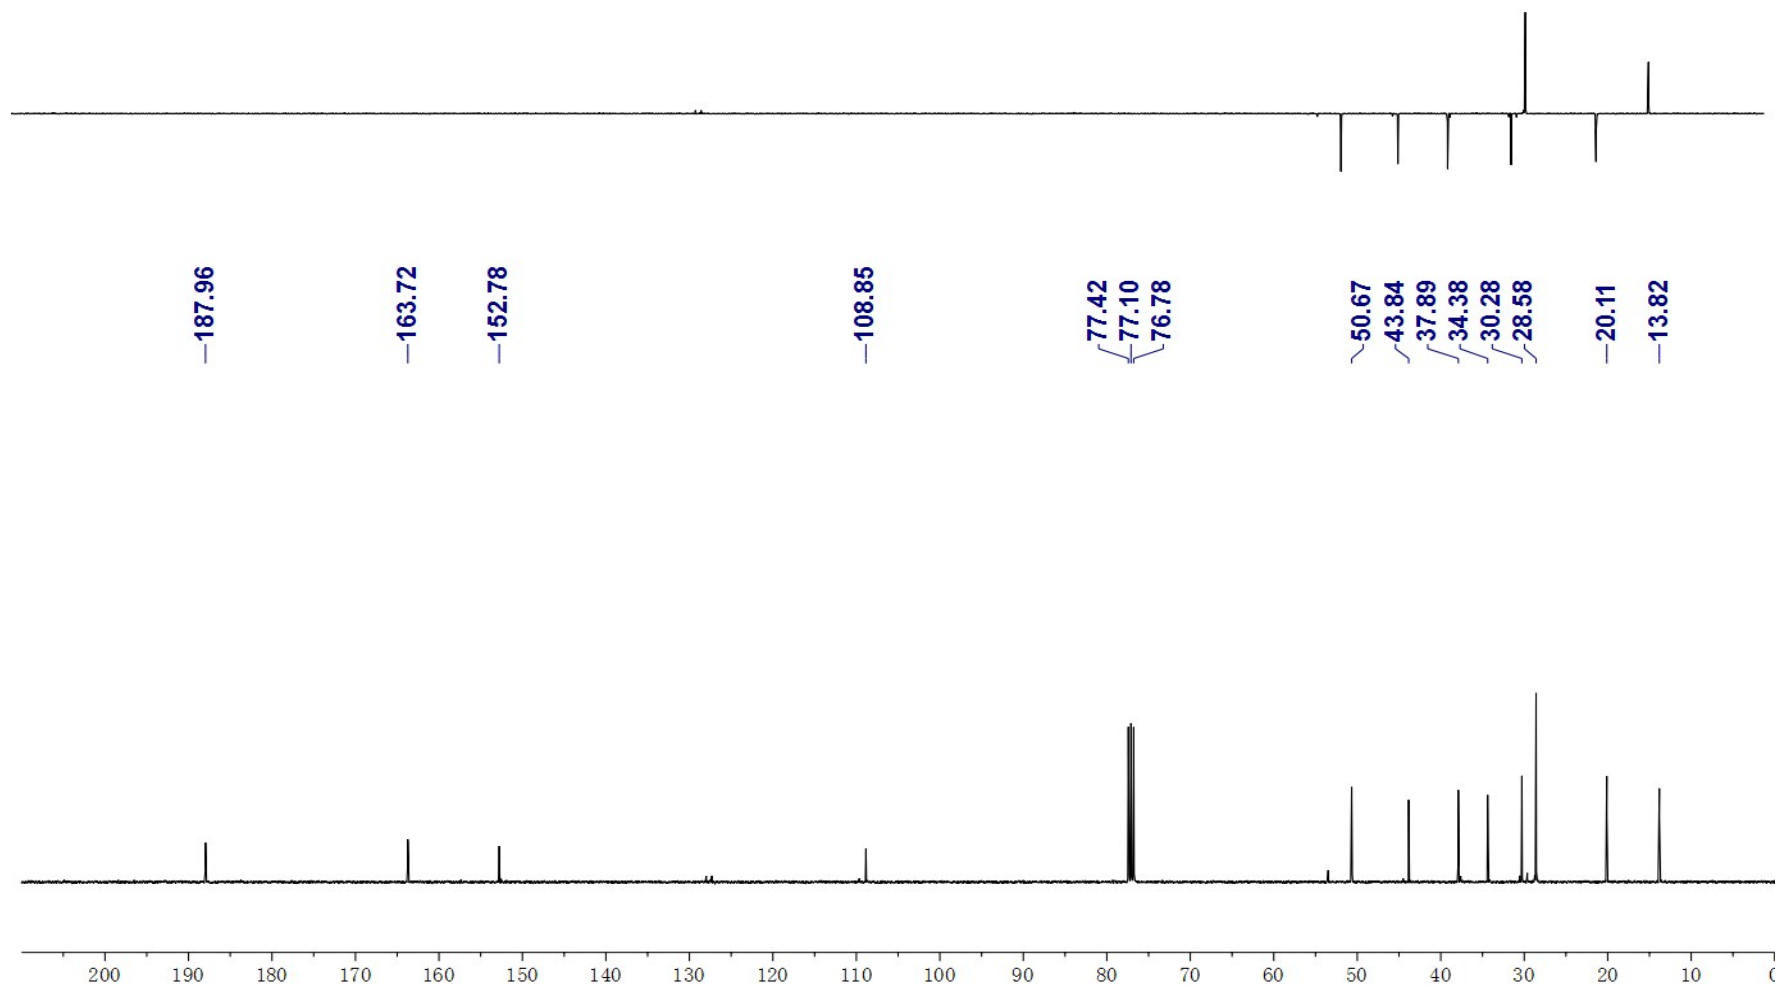

**Figure 50.** <sup>13</sup>C NMR (100 MHz, CDCl<sub>3</sub>) spectra of compound 4y

**$^1\text{H}$  NMR and  $^{13}\text{C}$  NMR Spectra for  $\alpha$ -bromo enaminone 5**

N-28.10.fid

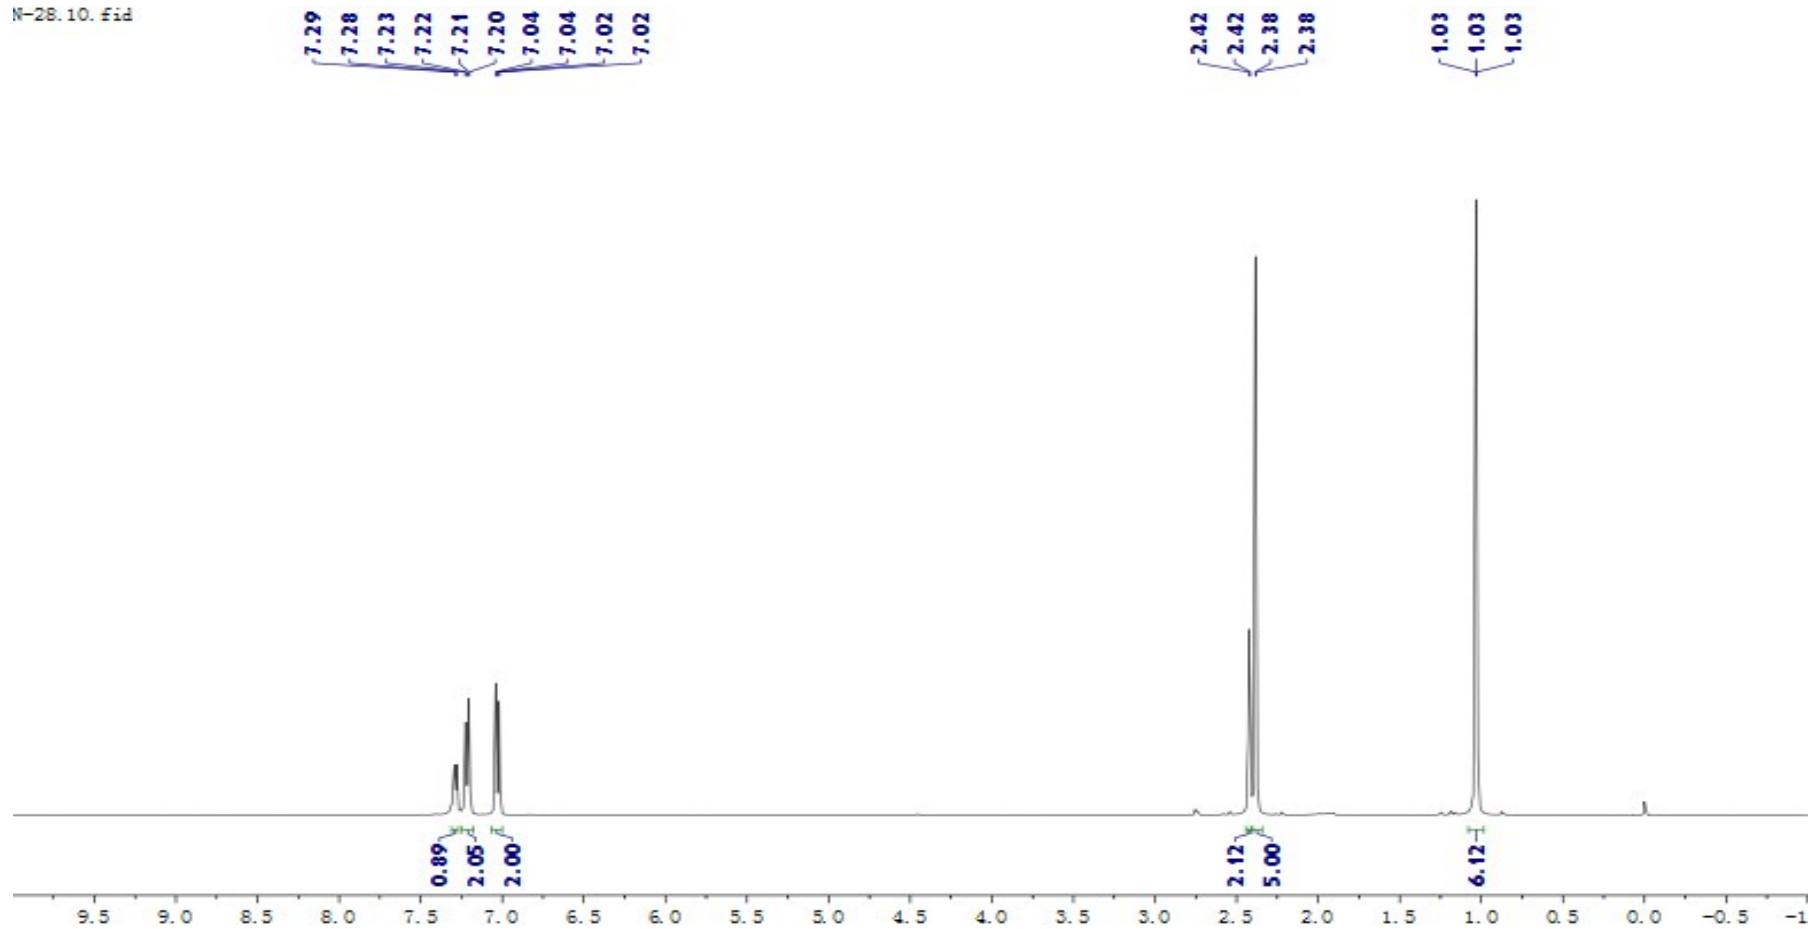

**Figure 51.**  $^1\text{H}$  NMR (400 MHz,  $\text{CDCl}_3$ ) spectra of compound 5v

N-28.12.fid

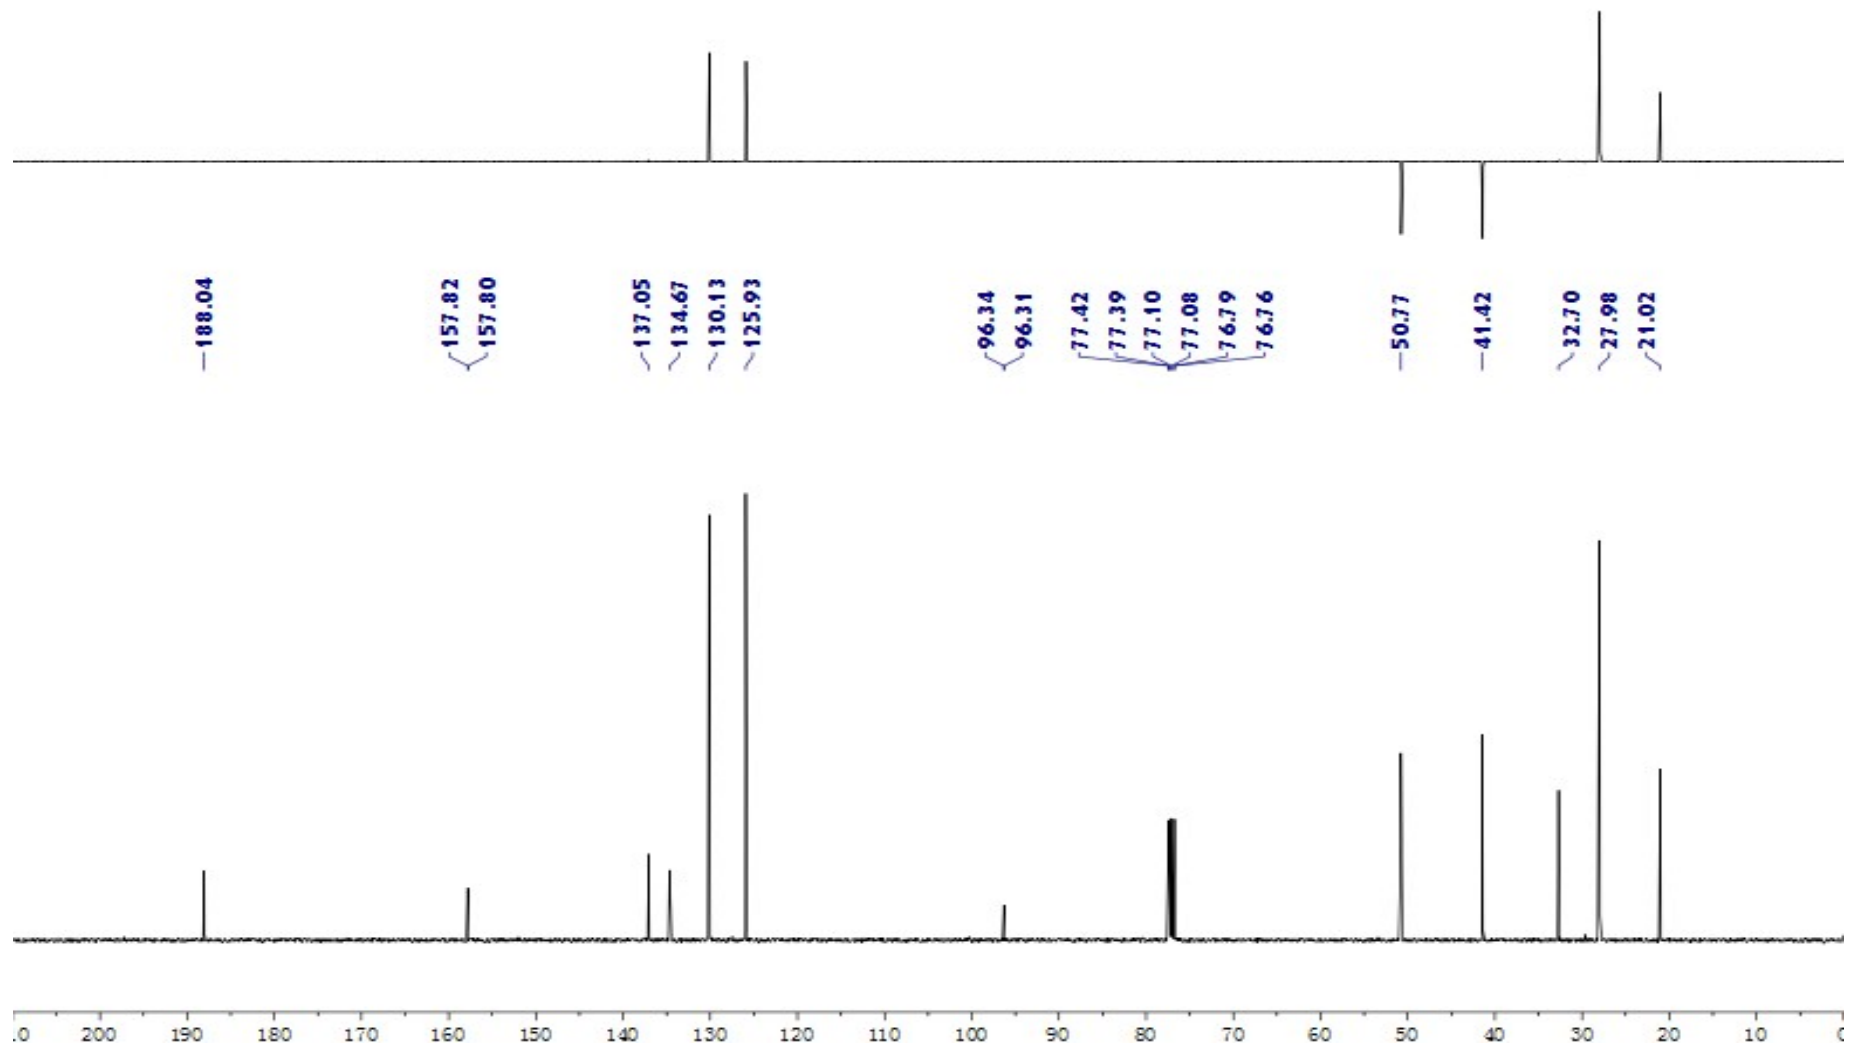

Figure 52.  $^{13}\text{C}$  NMR (100 MHz,  $\text{CDCl}_3$ ) spectra of compound **5v**
